# Supplementary material for: Near-infrared absorbing nonaromatic core-modified meta-benzicalixhexaphyrin(1.1.1.1.1.1)s
Source: Royal Society of Chemistry journal article supplement (doi:10.1039/d4ob00095a), 2024-01-01
Supplement: d4ob00095a1.pdf [file d4ob00095a1.pdf]

## Supporting Information

### Near Infrared Absorbing Nonaromatic Core modified *meta*-Benzicalixhexaphyrin(1.1.1.1.1)s

Pooja Varak and Mangalampalli Ravikanth\*

Department of Chemistry, Indian Institute of Technology Bombay, Powai, Mumbai 400076,  
India, E-mail: [ravikanth@chem.iitb.ac.in](mailto:ravikanth@chem.iitb.ac.in)

| Sr. no. | Details                                                                                                                                                                                                                           | Page no. |
|---------|-----------------------------------------------------------------------------------------------------------------------------------------------------------------------------------------------------------------------------------|----------|
| 1       | General experimental section                                                                                                                                                                                                      | S2-S3    |
| 2       | <b>Figures S1-S37.</b> Characterization (HR-MS and NMR) data for all new compounds.                                                                                                                                               | S4-S40   |
| 3       | <b>Figures S38-S39.</b> Absorption spectra for compounds <b>2-5</b> with and without TFA and systematic titration of compounds <b>2-5</b> with increasing amounts of TFA.                                                         | S41-S42  |
| 4       | <b>Figure S40.</b> Visual representation and absorption spectra of <b>4</b> , <b>4.2H<sup>+</sup></b> and response of <b>4.2H<sup>+</sup></b> to various anions (excess) as their tetrabutylammonium salts in CHCl <sub>3</sub> . | S43      |
| 5       | <b>Figures S41.</b> Electrochemical data for the compounds <b>2-5</b> .                                                                                                                                                           | S44      |
| 6       | <b>Figure S42.</b> NICS(0) values for compounds <b>2-5</b> .                                                                                                                                                                      | S45      |
| 7       | <b>Figure S43.</b> Probable mechanism for the formation of compounds <b>2-5</b> .                                                                                                                                                 | S46      |
| 8       | <b>Figures S44-S47 and Table S1, S2, S3, S4.</b> TD-DFT plots for compounds <b>2-5</b> and selected TD-DFT and calculated oscillator strengths for electronic transitions of <b>2-5</b> .                                         | S47-S55  |
| 9       | <b>Tables S5-S9.</b> Cartesian coordinates of the optimized (S <sub>0</sub> ) geometries of the compounds <b>2-5</b> and <b>4.2H<sup>+</sup></b> .                                                                                | S56-S66  |
| 10      | <b>Figures S48.</b> Energy level diagram (selected FMOs) of <b>4</b> and <b>4.2H<sup>+</sup></b>                                                                                                                                  | S64      |
| 11      | <b>Table S10.</b> Comparison of the relative energies of macrocycles <b>2-5</b> and expected compounds <b>6a-6d</b> .                                                                                                             | S66      |
| 12      | References                                                                                                                                                                                                                        | S67      |

**General Experimental Section:****Materials, methods and instruments**

BF<sub>3</sub>·OEt<sub>2</sub>, trifluoroacetic acid (TFA), 2, 3-dichloro-5, 6-dicyano-1, 4-benzoquinone (DDQ) and other chemicals used were obtained from Aldrich. All the other chemicals used for the synthesis were reagent grade unless mentioned otherwise. Silica gel and basic alumina column chromatographic method were performed for purification. The compounds **10a-10b**<sup>1</sup> and **8a-8d**<sup>2</sup> were synthesized by the reported method. The <sup>1</sup>H and <sup>13</sup>C NMR spectra were recorded in CDCl<sub>3</sub> on Bruker 400 and 500 MHz FT-NMR spectrometers using tetramethylsilane [Si(CH<sub>3</sub>)<sub>4</sub>] as the internal reference. The frequencies for <sup>13</sup>C nucleus being 100.06 and 125.77 MHz for 400 MHz and 500 MHz instruments respectively. Absorption spectra were obtained with Shimadzu UV-Vis-NIR Spectrophotometer. The stock solutions of the macrocycles (2×10<sup>-5</sup> M) were prepared using HPLC-grade chloroform. Cyclic voltammetry (CV) studies were carried out with BASi C3 Cell Stand electrochemical system utilizing the three-electrode configuration consisting of a glassy carbon (working electrode), platinum wire (auxiliary electrode) and saturated calomel as reference electrode (the electrode is composed of Hg/Hg<sub>2</sub>Cl<sub>2</sub>/Saturated KCl solution). The concentrations of the samples were maintained as 0.01 M containing 0.1 M tetrabutylammonium perchlorate (TBAP) as the supporting electrolyte in dichloromethane at 25 °C under an argon atmosphere at a scan rate of 50 mV/s. The half-wave potentials measured using differential pulse voltammetry were calculated manually by taking the average of the cathodic and anodic peak potentials. All the potentials were calibrated using ferrocene as an external standard, taking E<sup>1/2</sup> (Fc/Fc<sup>+</sup>) = 0.42 V *versus* SCE. The HR mass spectra were recorded with a Bruker maXis Impact and Q-TOF micro mass spectrometer using positive mode ESI methods in acetonitrile or methanol.

**Computational Details:**

All computations were performed using the Gaussian 09 program package.<sup>3</sup> The density functional theory (DFT) method, with hybrid functional B3LYP in conjunction with 6-31G\*\*+LANL2DZ basis sets were implemented to optimize the geometries of macrocycles **2-5** in ground ( $S_0$ ) state.<sup>4</sup> In order to improve the accuracy of electronic structure calculations and geometry optimization in  $S_0$  state, dispersive interactions in the electron density of the macrocycles were studied using Grimme's dispersion correction method (GD2) over the B3LYP/6-31G\*\*+LANL2DZ level of theory.<sup>5</sup> Oscillator strengths were obtained using identical basis and functional hybrid set, whereas the vertical excitation energies were obtained by the help of TD-DFT techniques for first fifty  $S_0 \rightarrow S_n$  transitions.<sup>6</sup> All computations were performed in toluene medium using the Polarizable Continuum Model (PCM) and Self-Consistent Reaction Field (SCRF).<sup>7</sup> The electronic absorption spectra, and the oscillator strengths were thoroughly examined using time-dependent DFT with the PCM model based on the optimized structures in the  $S_0$  state.

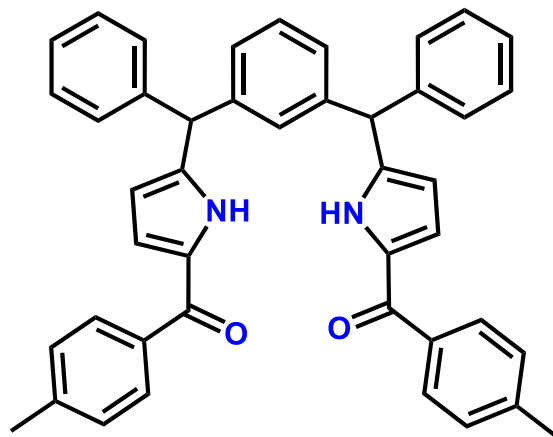

Compound 7a

## DEPARTMENT OF CHEMISTRY, I.I.T.(B)

## Analysis Info

Analysis Name D:\Data\JULY-2023\MR-PV-PH-TOL-DA.d  
 Method Naformat\_pos\_1000a.m  
 Sample Name MR-PV-PH-TOL-DA  
 Comment C44H36N2O2

Acquisition Date 7/13/2023 4:04:48 PM

Operator PG-SRD-IN  
 Instrument maXis impact 282001.00081

## Acquisition Parameter

|             |            |                      |          |                  |           |
|-------------|------------|----------------------|----------|------------------|-----------|
| Source Type | ESI        | Ion Polarity         | Positive | Set Nebulizer    | 0.3 Bar   |
| Focus       | Not active | Set Capillary        | 3700 V   | Set Dry Heater   | 180 °C    |
| Scan Begin  | 50 m/z     | Set End Plate Offset | -500 V   | Set Dry Gas      | 4.0 l/min |
| Scan End    | 1000 m/z   | Set Charging Voltage | 2000 V   | Set Divert Valve | Source    |
|             |            | Set Corona           | 0 nA     | Set APCI Heater  | 0 °C      |

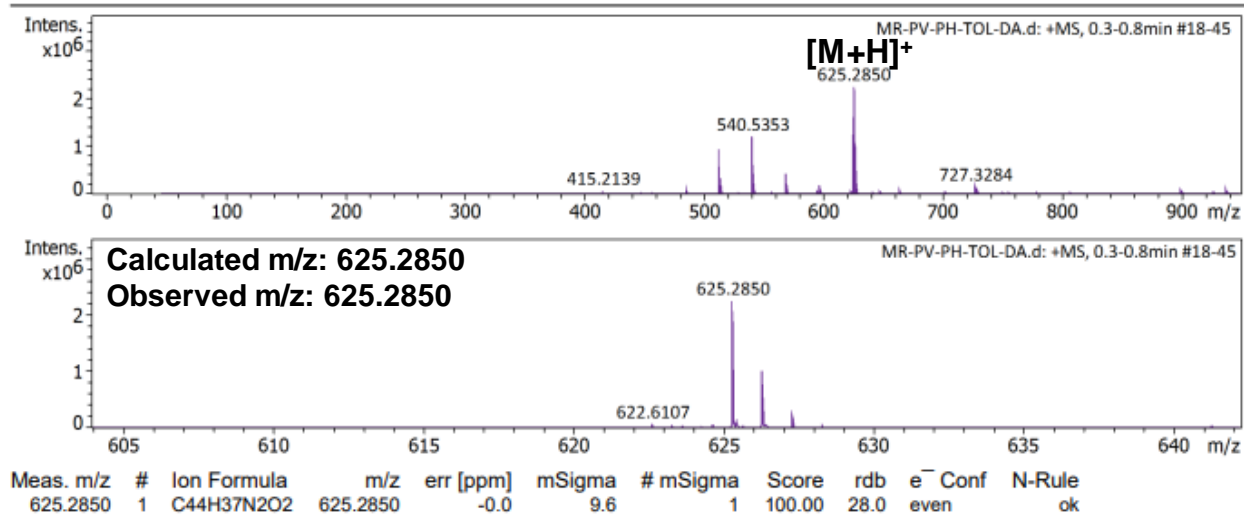

Figure S1. HR mass spectrum of the compound 7a.

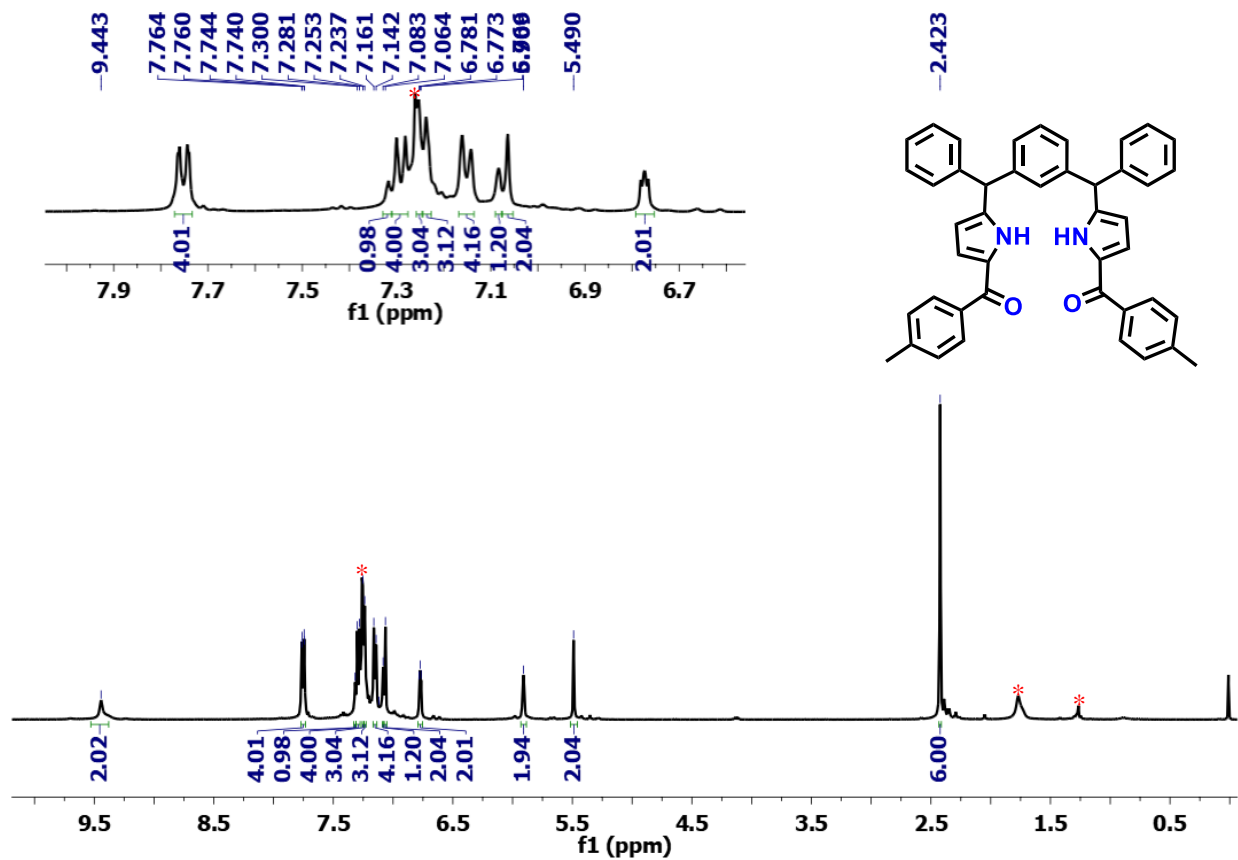

**Figure S2.**  $^1\text{H-NMR}$  spectrum of the compound **7a** recorded in  $\text{CDCl}_3$  on 400 MHz NMR instrument. Note: Peaks marked with asterisk (\*) are due to residual solvents.

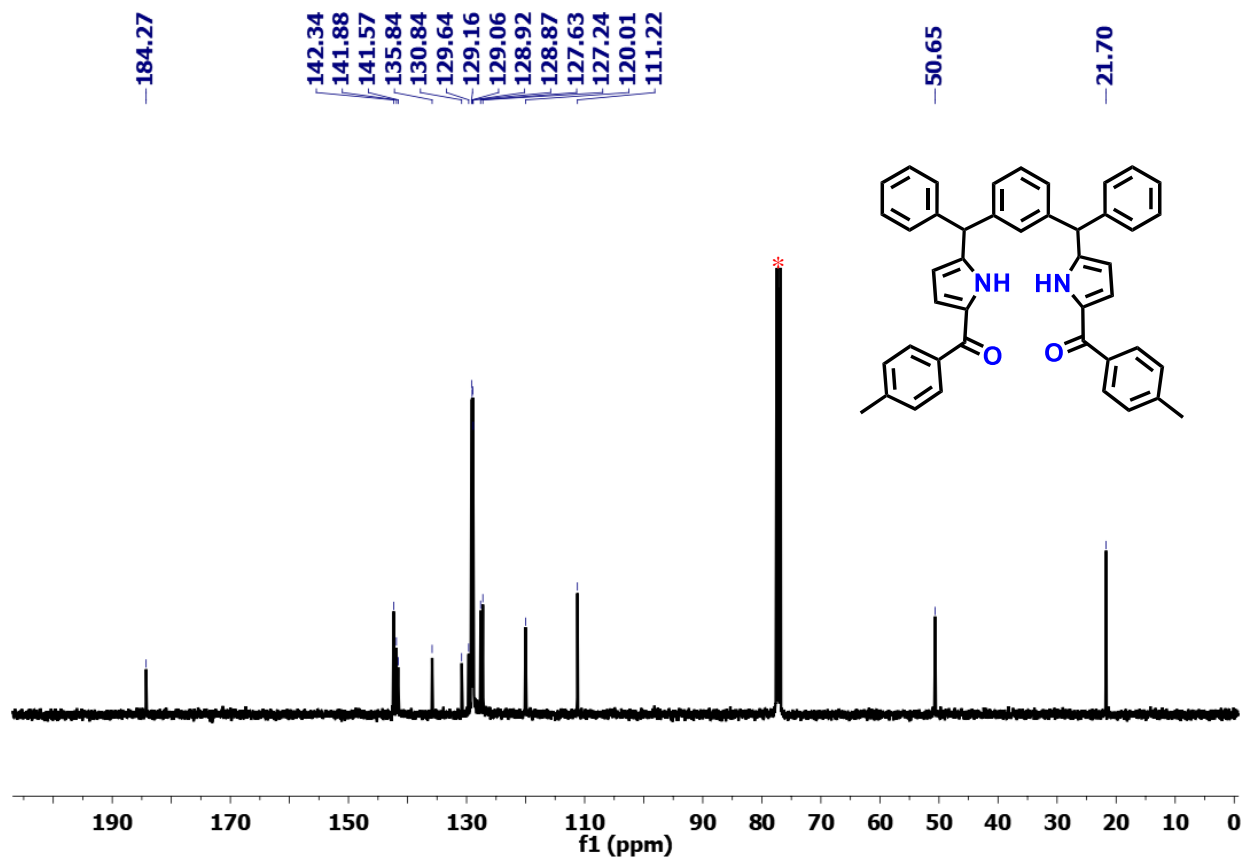

**Figure S3.**  $^{13}\text{C}\{^1\text{H}\}$  NMR spectrum of the compound **7a** recorded in  $\text{CDCl}_3$  on 101 MHz NMR instrument. Note: Peaks marked with asterisk (\*) are due to residual solvents.

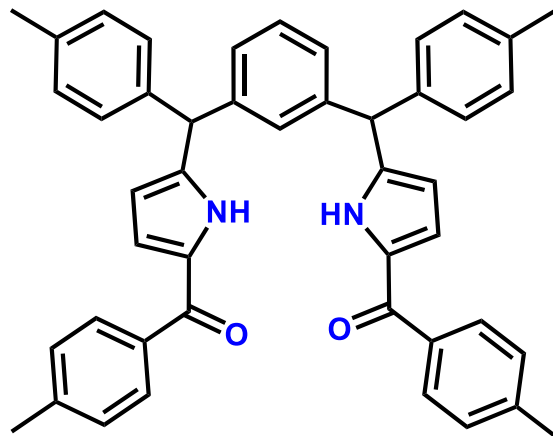

Compound 7a

## DEPARTMENT OF CHEMISTRY, I.I.T.(B)

## Analysis Info

Analysis Name D:\Data\MAY-2023\MR-PV-M-DIACYLA.d  
 Method Naformat\_pos\_1000a.m  
 Sample Name MR-PV-M-DIACYLA  
 Comment C46H40N2O2

Acquisition Date 5/15/2023 12:08:28 PM

Operator PG ROHAN OUT  
 Instrument maXis impact 282001.00081

## Acquisition Parameter

|             |            |                      |          |                  |           |
|-------------|------------|----------------------|----------|------------------|-----------|
| Source Type | ESI        | Ion Polarity         | Positive | Set Nebulizer    | 0.3 Bar   |
| Focus       | Not active | Set Capillary        | 3700 V   | Set Dry Heater   | 180 °C    |
| Scan Begin  | 50 m/z     | Set End Plate Offset | -500 V   | Set Dry Gas      | 4.0 l/min |
| Scan End    | 1000 m/z   | Set Charging Voltage | 2000 V   | Set Divert Valve | Source    |
|             |            | Set Corona           | 0 nA     | Set APCI Heater  | 0 °C      |

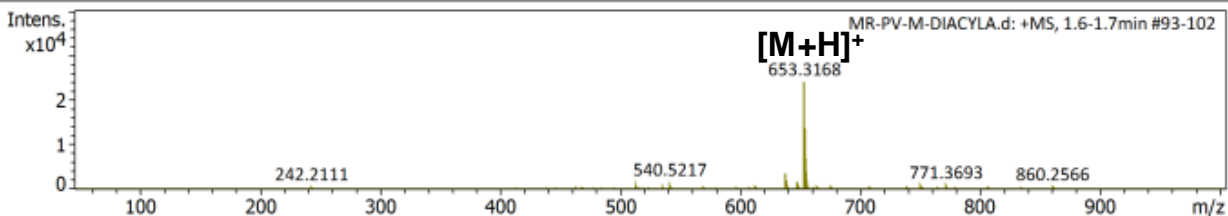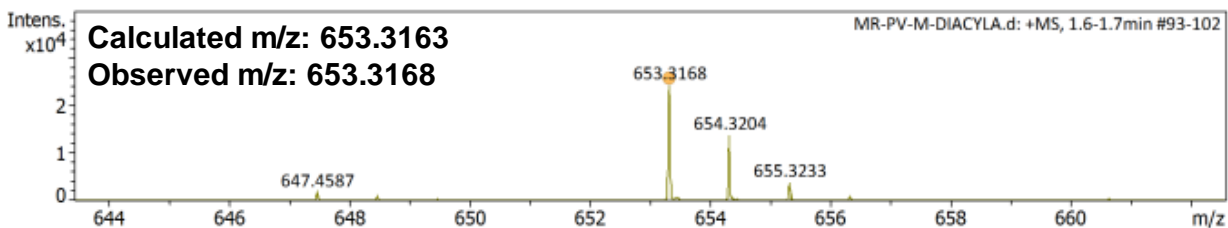

| Meas. m/z | # | Ion Formula | m/z      | err [ppm] | mSigma | # mSigma | Score  | rdb  | e <sup>-</sup> Conf | N-Rule |
|-----------|---|-------------|----------|-----------|--------|----------|--------|------|---------------------|--------|
| 653.3168  | 1 | C46H41N2O2  | 653.3163 | -0.9      | 30.1   | 1        | 100.00 | 28.0 | even                | ok     |

Figure S4. HR mass spectrum of the compound 7b.

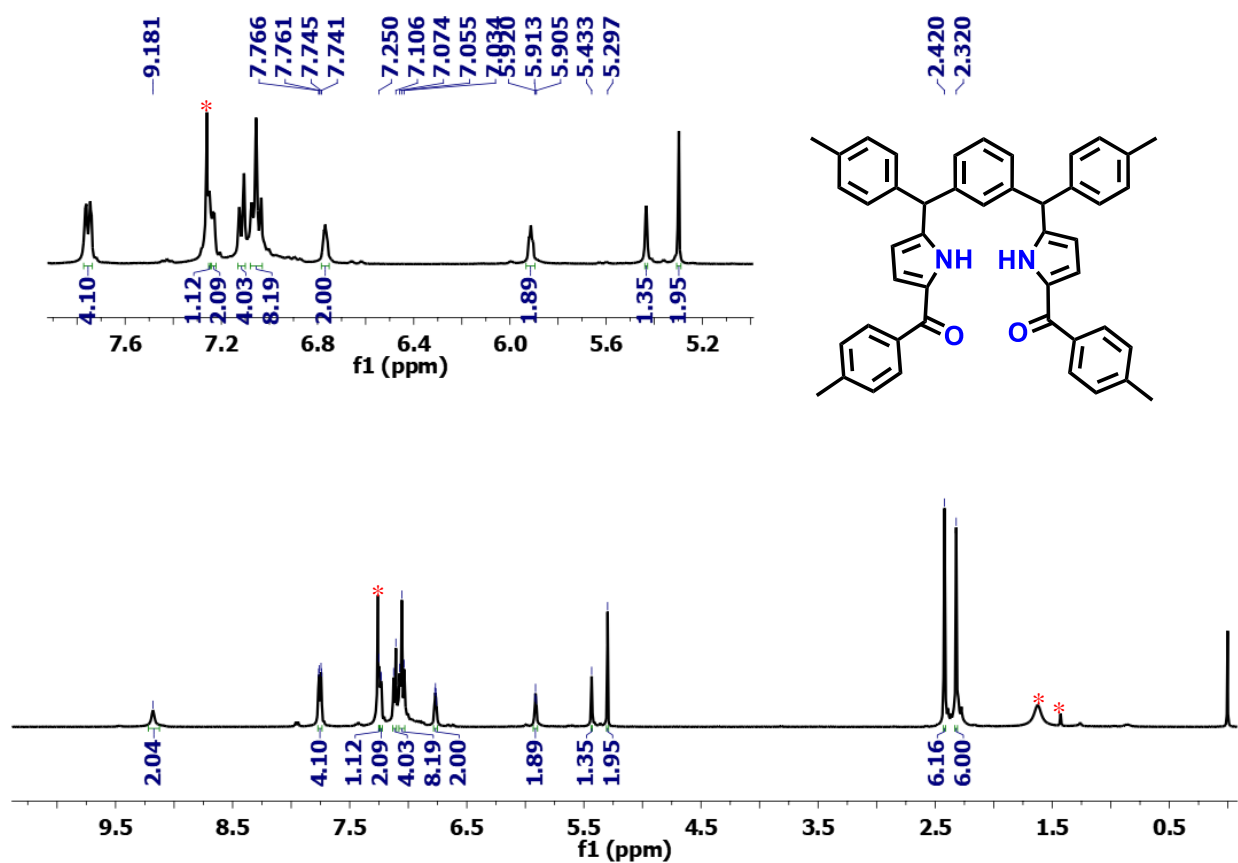

**Figure S5.**  $^1\text{H-NMR}$  spectrum of the compound **7b** recorded in  $\text{CDCl}_3$  on 400 MHz NMR instrument. Note: Peaks marked with asterisk (\*) are due to residual solvents.



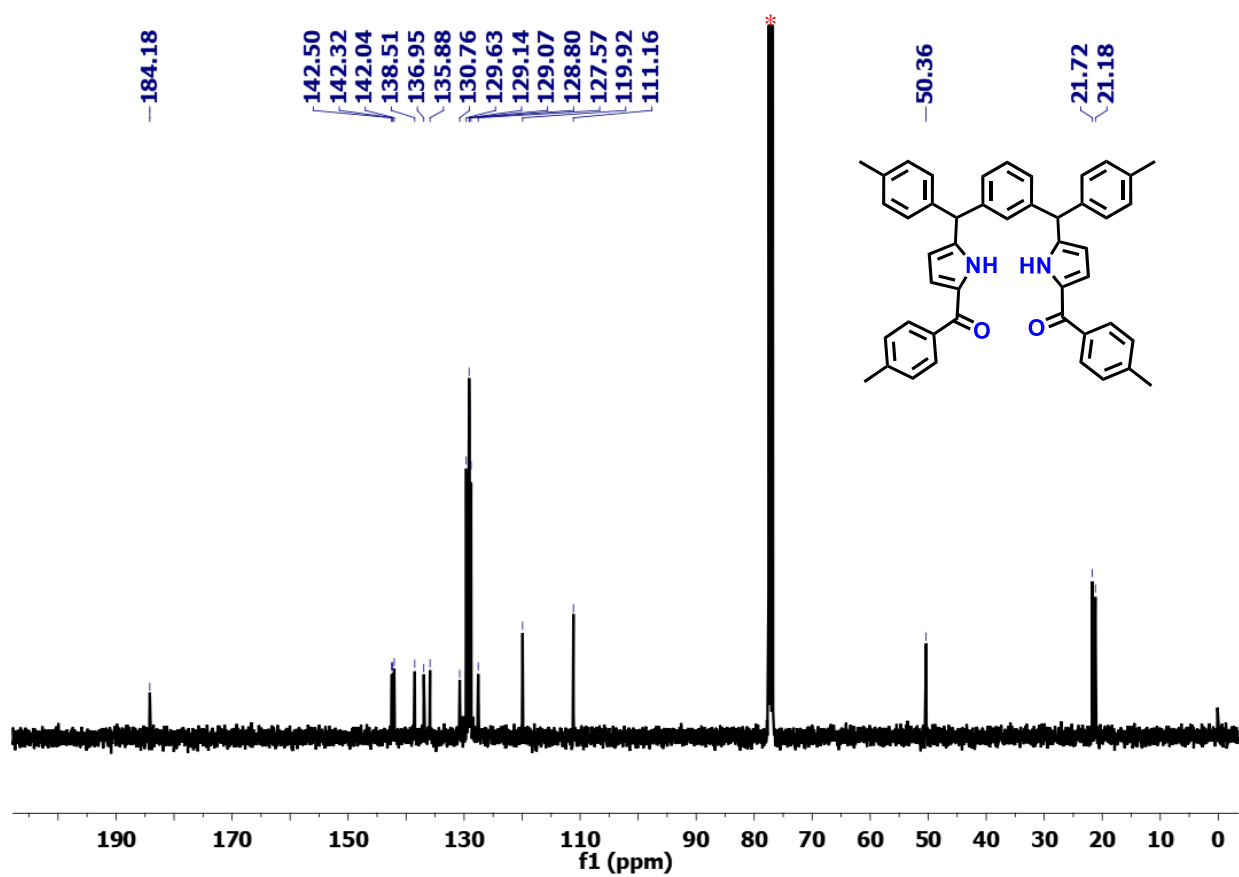

**Figure S6.**  $^{13}\text{C}\{^1\text{H}\}$  NMR spectrum of the compound **7b** recorded in  $\text{CDCl}_3$  on 101 MHz NMR instrument. Note: Peaks marked with asterisk (\*) are due to residual solvents.

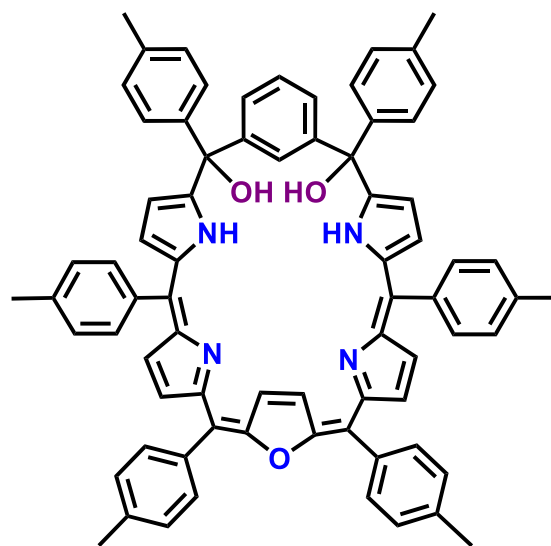

Compound 2

## DEPARTMENT OF CHEMISTRY, I.I.T.(B)

## Analysis Info

Analysis Name D:\Data\MAY-2023\MR-PV-OXAMAA.d  
 Method NaICSI\_pos\_1500.m  
 Sample Name MR-PV-OXAMAA  
 Comment C74H60N4O3

Acquisition Date 5/29/2023 4:06:59 PM

Operator GKL-LS-OUT  
 Instrument maXis impact 282001.00081

## Acquisition Parameter

|             |            |                      |          |                  |           |
|-------------|------------|----------------------|----------|------------------|-----------|
| Source Type | ESI        | Ion Polarity         | Positive | Set Nebulizer    | 0.3 Bar   |
| Focus       | Not active | Set Capillary        | 3700 V   | Set Dry Heater   | 180 °C    |
| Scan Begin  | 50 m/z     | Set End Plate Offset | -500 V   | Set Dry Gas      | 4.0 l/min |
| Scan End    | 1500 m/z   | Set Charging Voltage | 2000 V   | Set Divert Valve | Source    |
|             |            | Set Corona           | 0 nA     | Set APCI Heater  | 0 °C      |

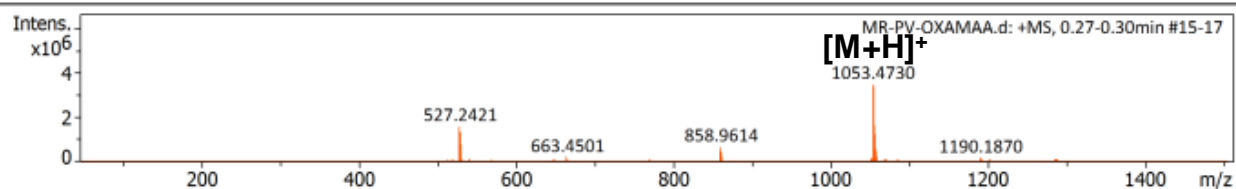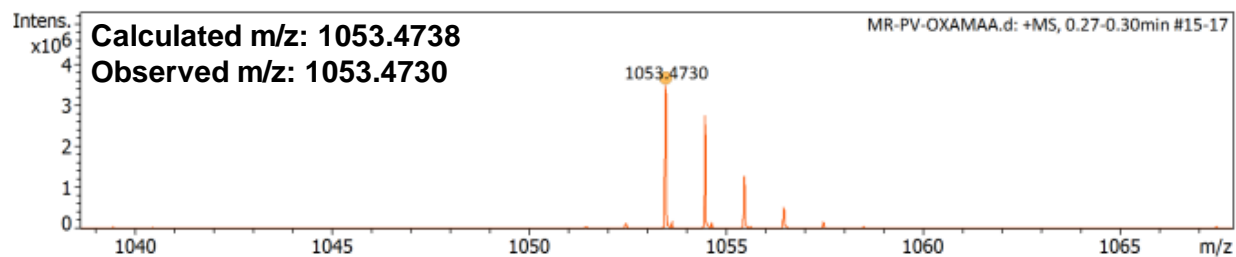

| Meas. m/z | # | Ion Formula | m/z       | err [ppm] | mSigma | # mSigma | Score  | rdb  | e <sup>-</sup> Conf | N-Rule |
|-----------|---|-------------|-----------|-----------|--------|----------|--------|------|---------------------|--------|
| 1053.4730 | 1 | C74H61N4O3  | 1053.4738 | 0.8       | 30.5   | 1        | 100.00 | 47.0 | even                | ok     |

Figure S7. HR mass spectrum of the compound 2.

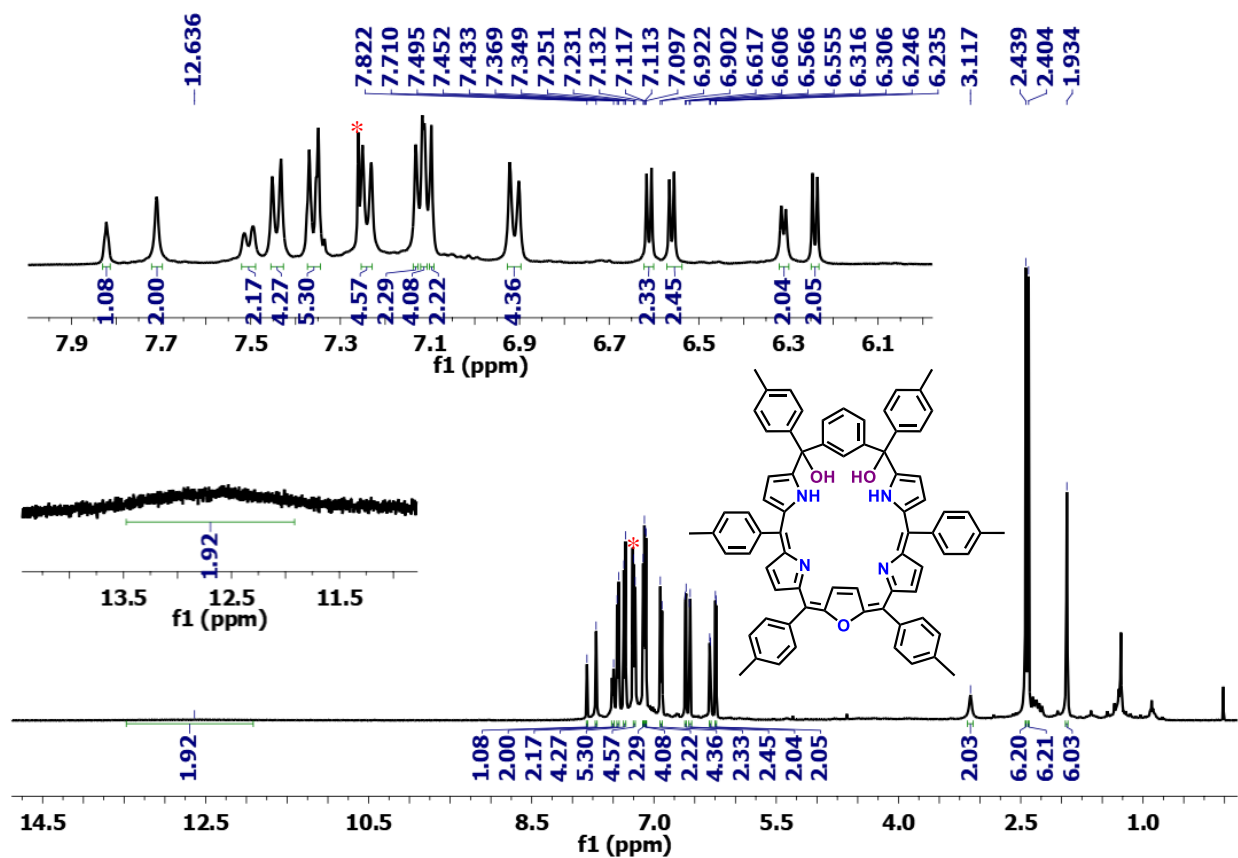

**Figure S8.**  $^1\text{H-NMR}$  spectrum of the compound **2** recorded in  $\text{CDCl}_3$  on 400 MHz NMR instrument. Note: Peaks marked with asterisk (\*) are due to residual solvents.

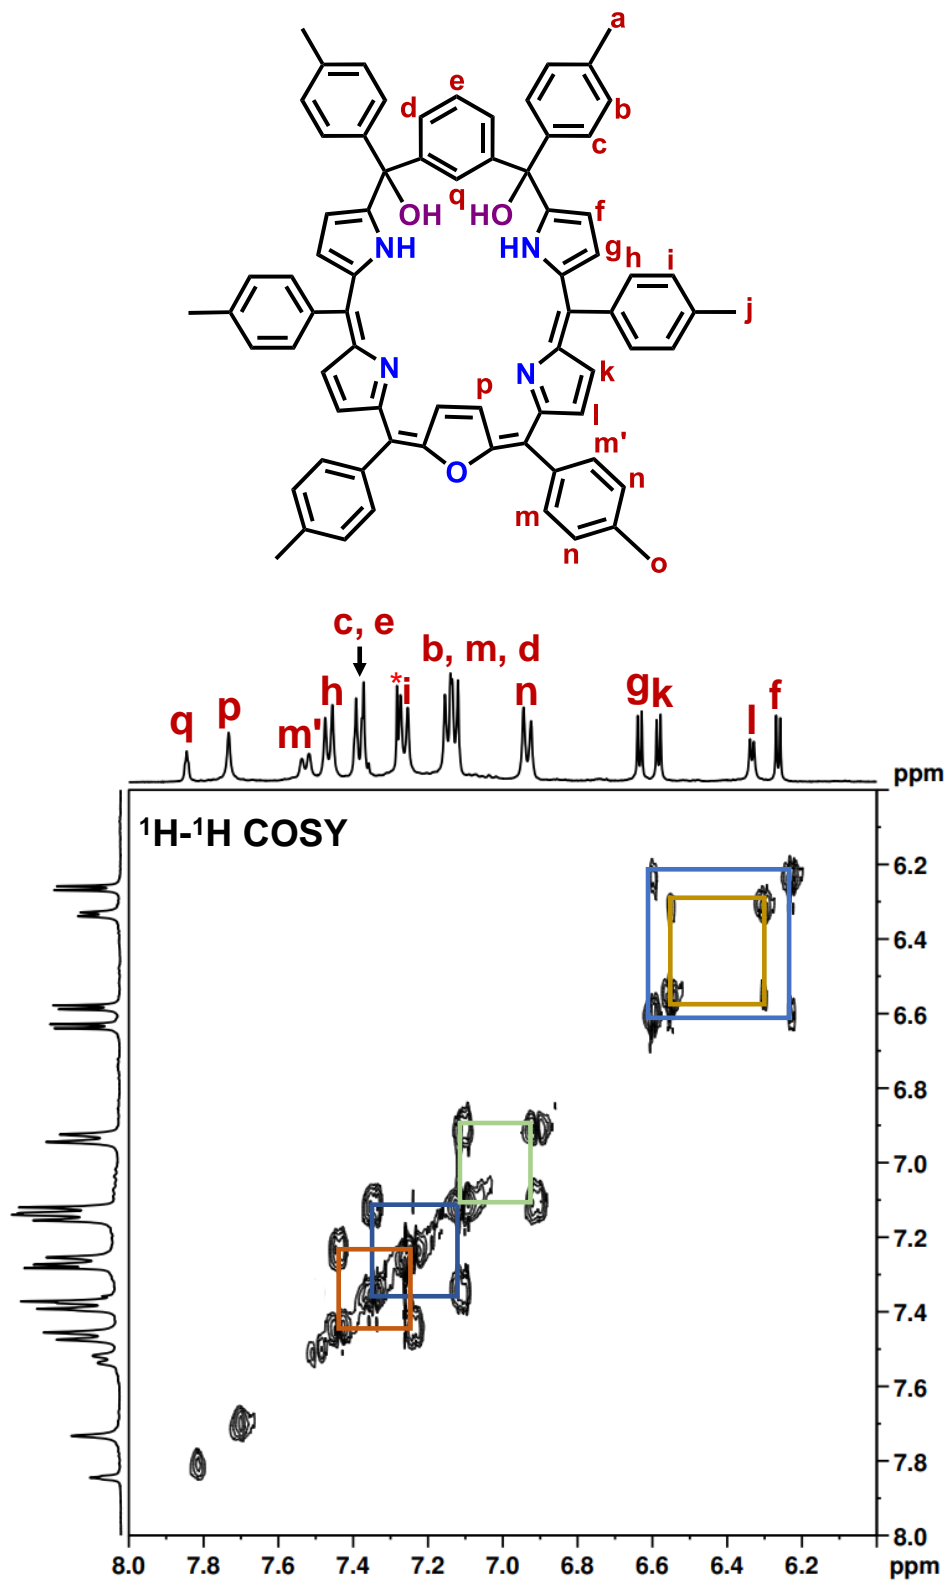

**Figure S9.**  $^1\text{H}$ - $^1\text{H}$  COSY of compound **2** recorded in  $\text{CDCl}_3$  at 25 °C.

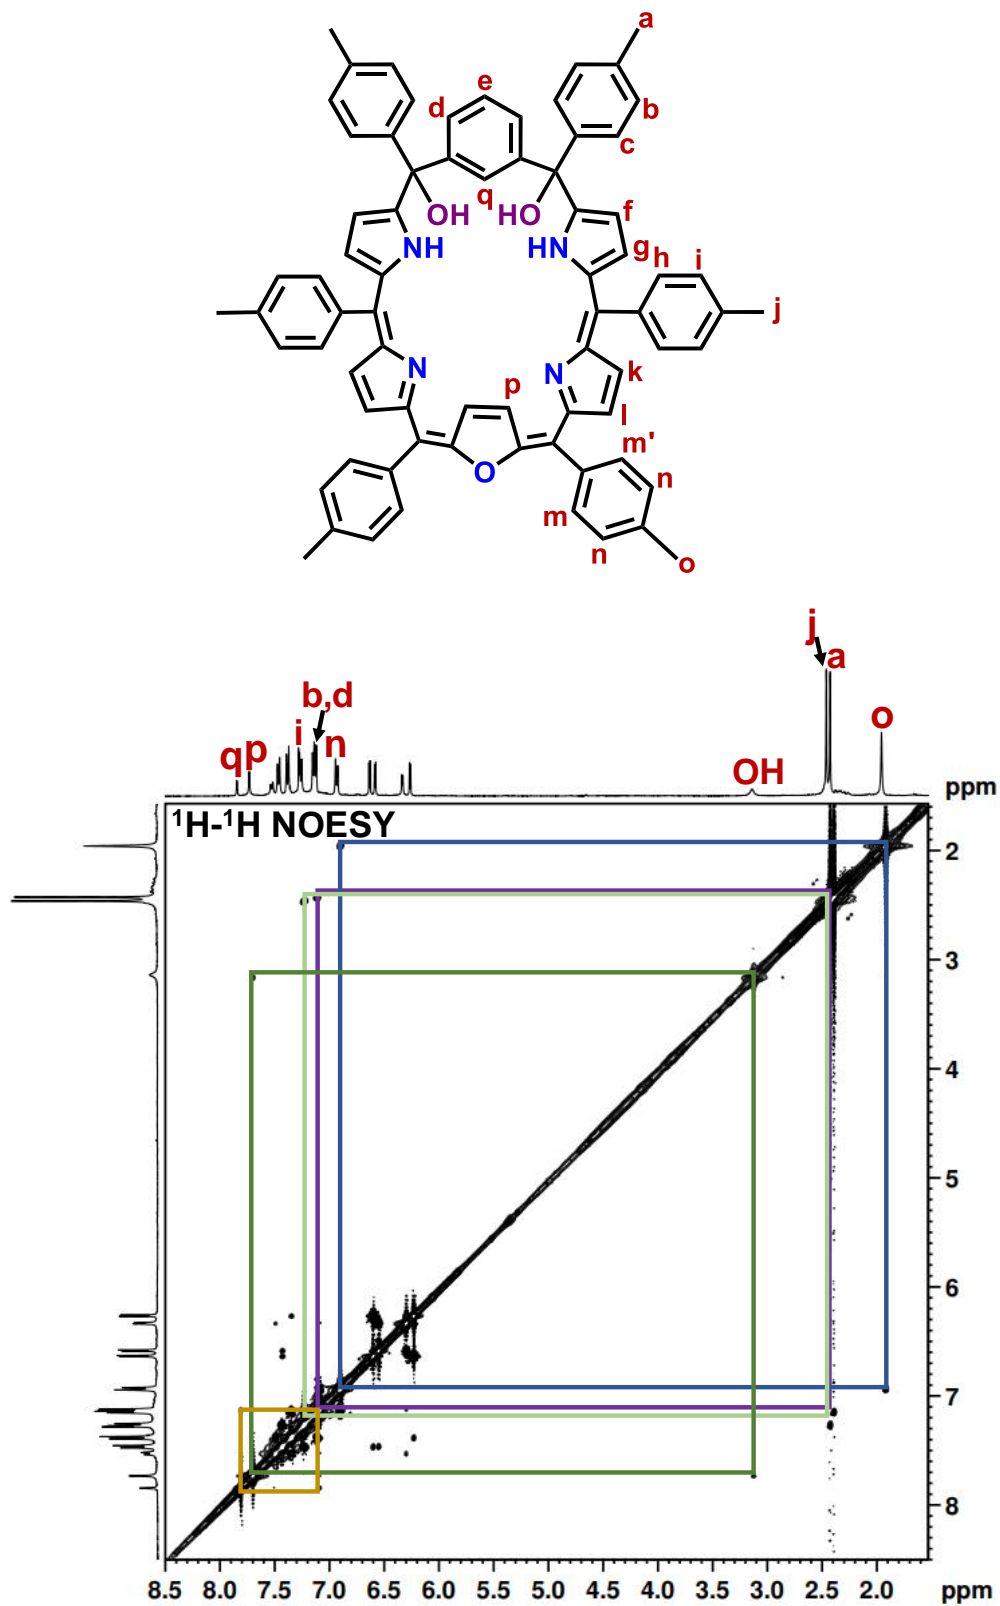

Figure S10.  $^1\text{H}$ - $^1\text{H}$  NOESY of compound 2 recorded in  $\text{CDCl}_3$  at 25 °C.

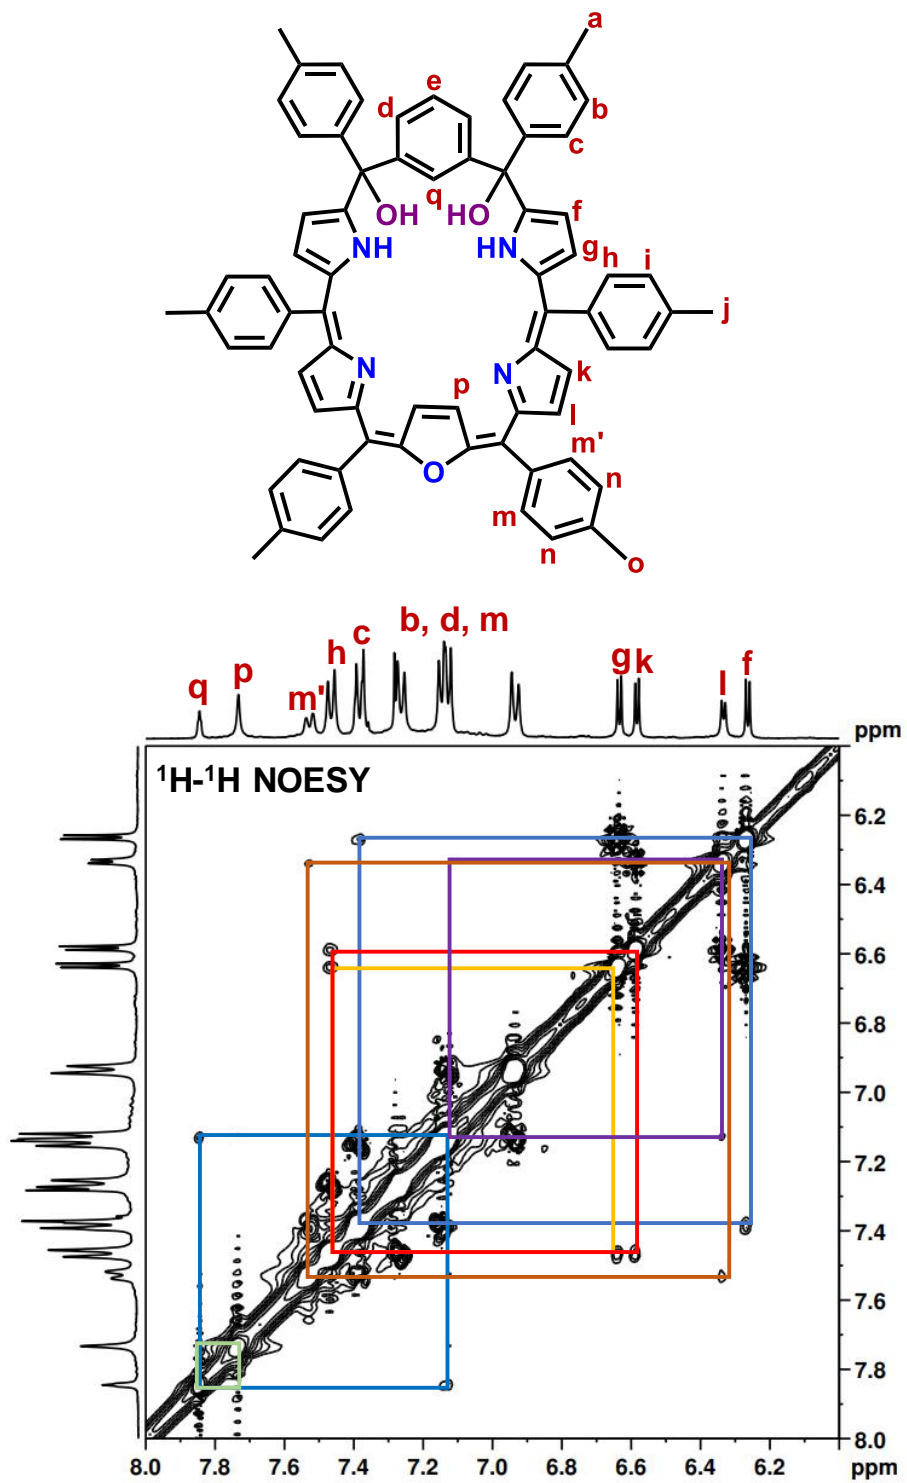

Figure S11. Expanded  $^1\text{H}$ - $^1\text{H}$  NOESY of compound 2 recorded in  $\text{CDCl}_3$  at 25  $^\circ\text{C}$ .

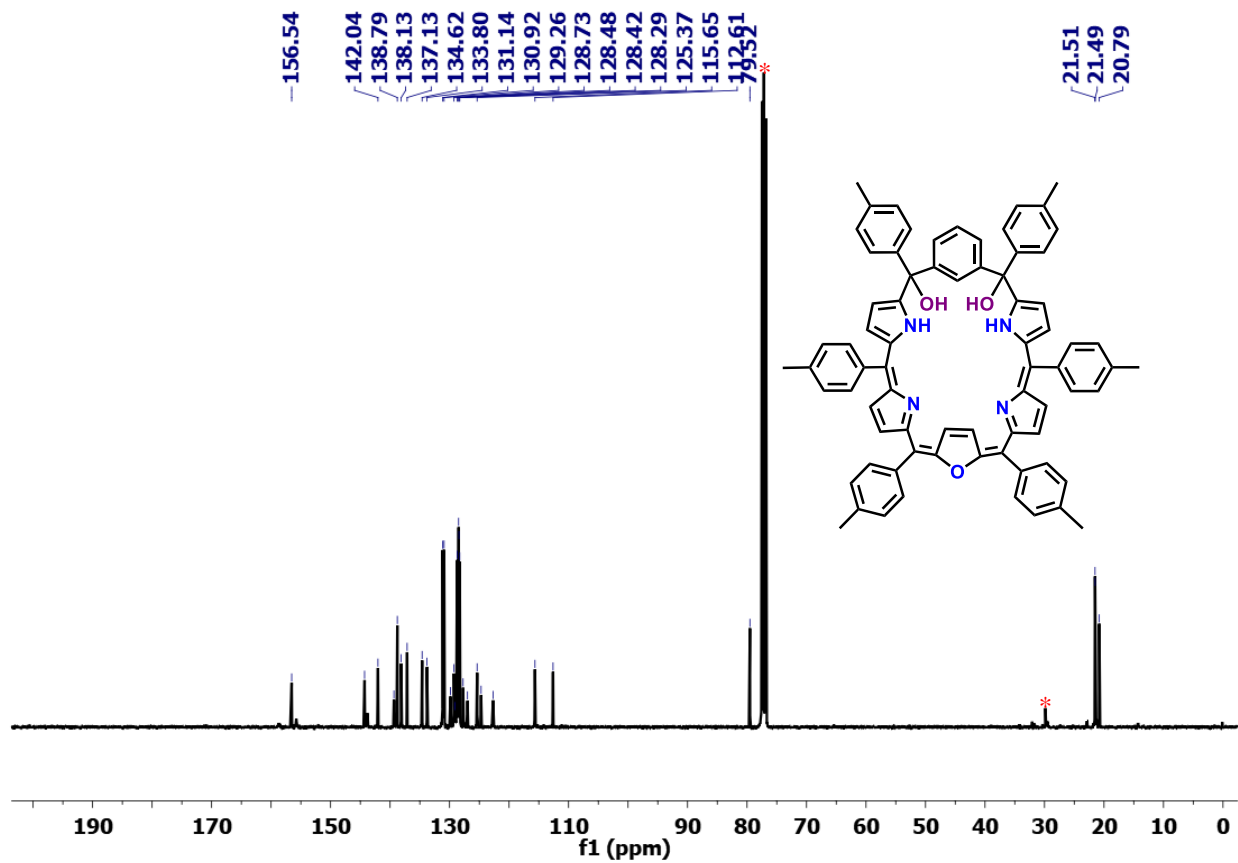

**Figure S12.**  $^{13}\text{C}\{^1\text{H}\}$  NMR spectrum of the compound **2** recorded in  $\text{CDCl}_3$  on 101 MHz NMR instrument. Note: Peaks marked with asterisk (\*) are due to residual solvents.

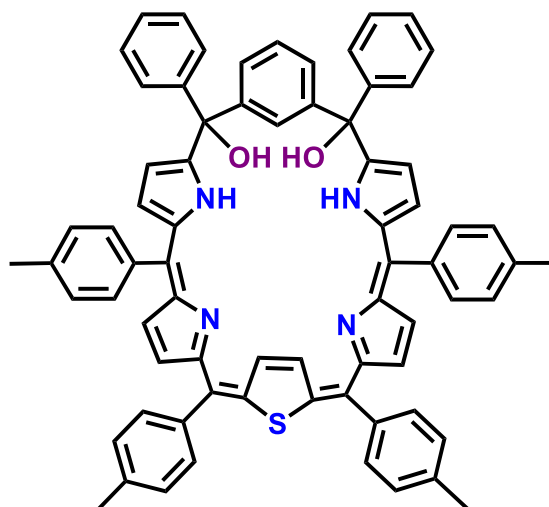

Compound 3a

## DEPARTMENT OF CHEMISTRY, I.I.T.(B)

## Analysis Info

Analysis Name D:\Data\APR-2023\MR-PV-RED.d  
 Method Naformat\_pos\_1500.m  
 Sample Name MR-PV-RED  
 Comment C72H56N4O2S

Acquisition Date 4/20/2023 4:11:24 PM

Operator PG SRD IN  
 Instrument maXis impact 282001.00081

## Acquisition Parameter

|             |            |                      |          |                  |           |
|-------------|------------|----------------------|----------|------------------|-----------|
| Source Type | ESI        | Ion Polarity         | Positive | Set Nebulizer    | 0.3 Bar   |
| Focus       | Not active | Set Capillary        | 3700 V   | Set Dry Heater   | 180 °C    |
| Scan Begin  | 100 m/z    | Set End Plate Offset | -500 V   | Set Dry Gas      | 4.0 l/min |
| Scan End    | 1500 m/z   | Set Charging Voltage | 2000 V   | Set Divert Valve | Source    |
|             |            | Set Corona           | 0 nA     | Set APCI Heater  | 0 °C      |

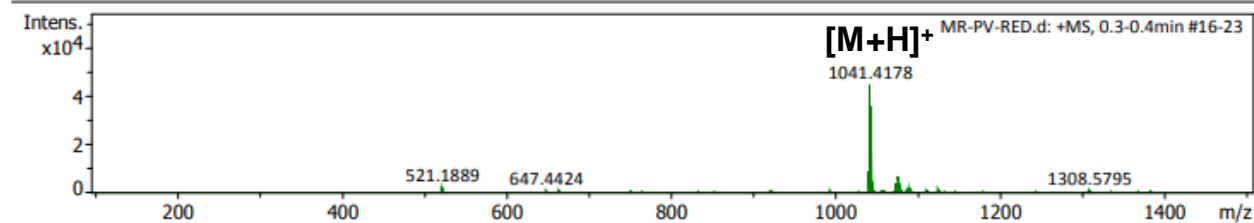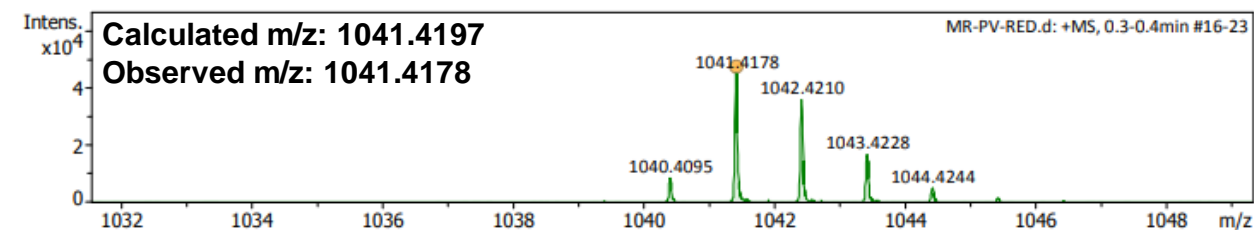

| Meas. m/z | # | Ion Formula | m/z       | err [ppm] | mSigma | # mSigma | Score  | rdb  | e <sup>-</sup> Conf | N-Rule |
|-----------|---|-------------|-----------|-----------|--------|----------|--------|------|---------------------|--------|
| 1041.4178 | 1 | C72H57N4O2S | 1041.4197 | 1.8       | 5.6    | 1        | 100.00 | 49.0 | even                | ok     |

Figure S13. HR mass spectrum of the compound 3a.



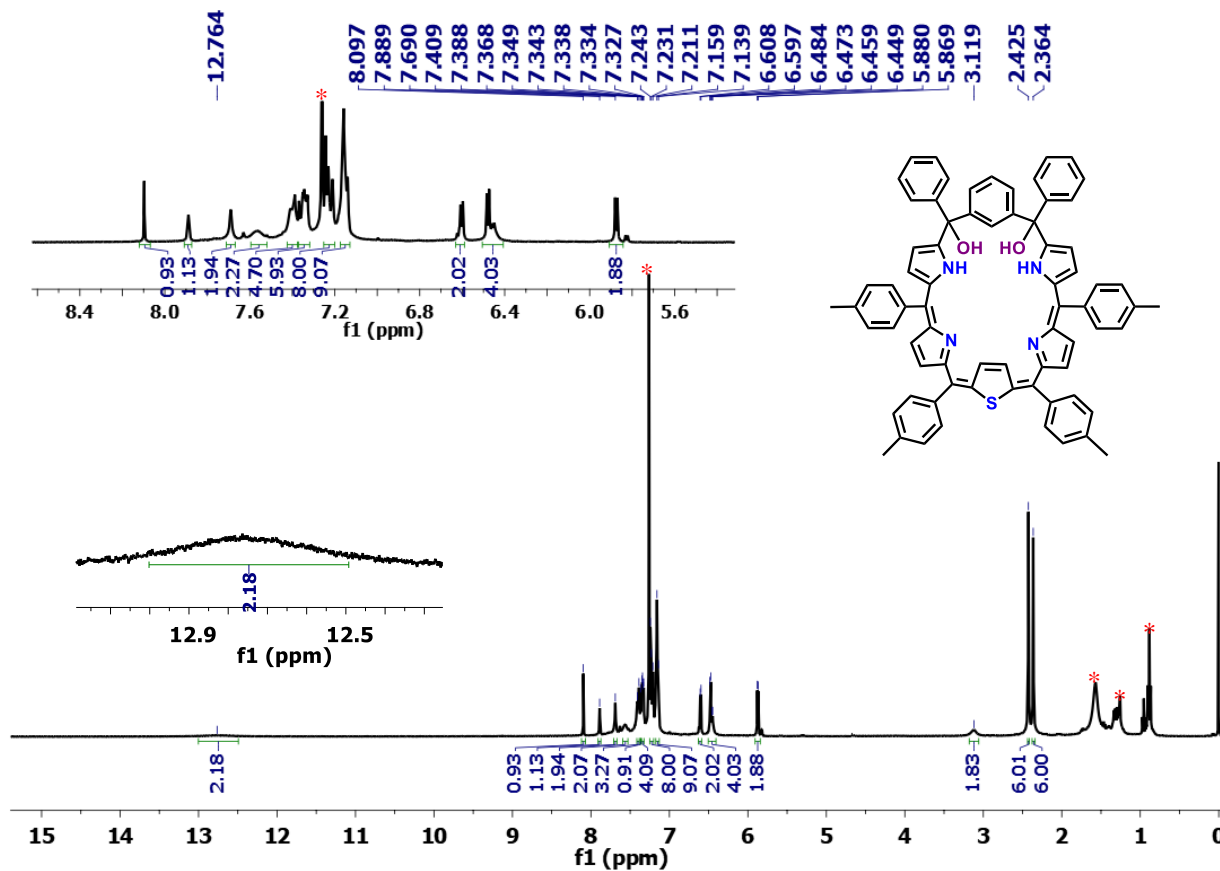

**Figure S14.** <sup>1</sup>H-NMR spectrum of the compound **3a** recorded in CDCl<sub>3</sub> at 25 °C on 400 MHz NMR instrument. Note: Peaks marked with asterisk (\*) are due to residual solvents.

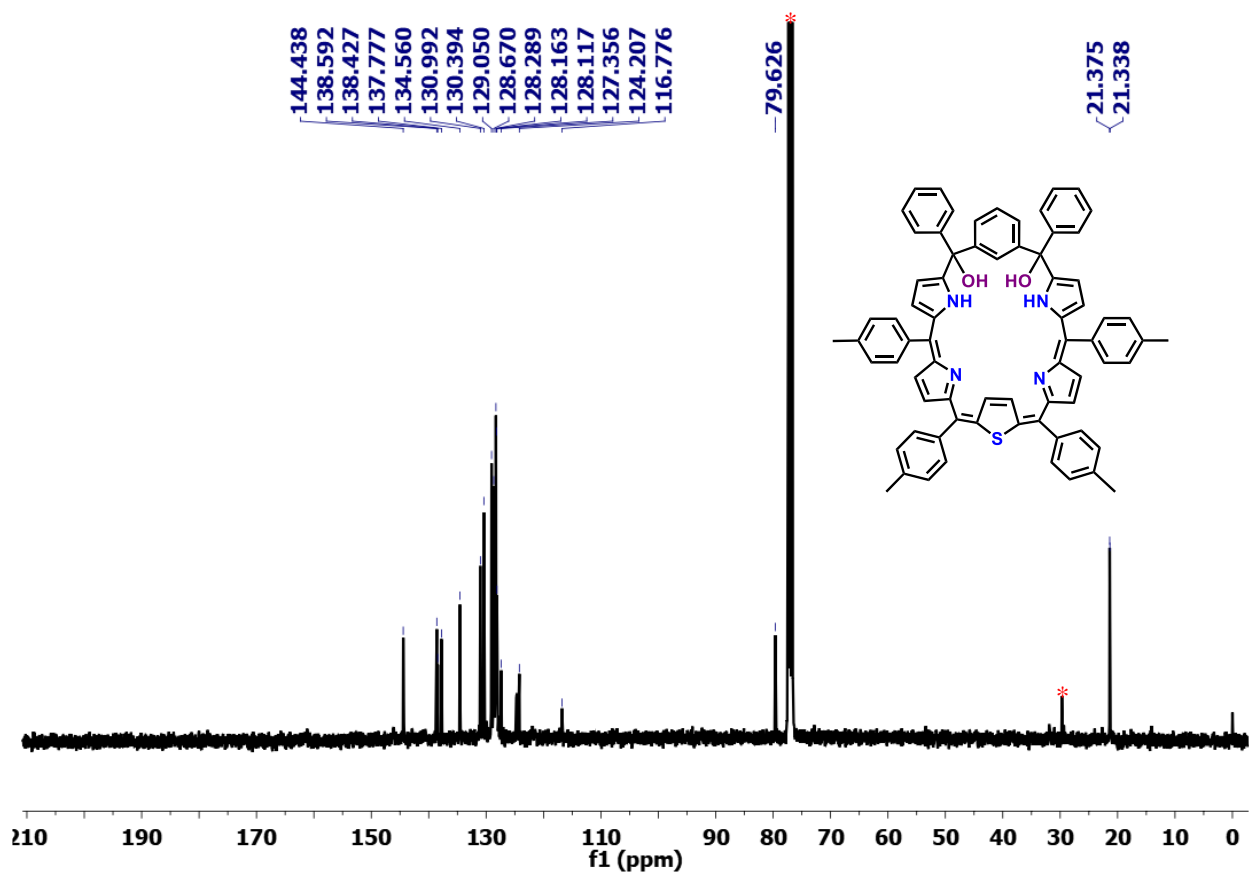

**Figure S15.**  $^{13}\text{C}\{^1\text{H}\}$  NMR spectrum of the compound **3a** recorded in  $\text{CDCl}_3$  on 101 MHz NMR instrument. Note: Peaks marked with asterisk (\*) are due to residual solvents.

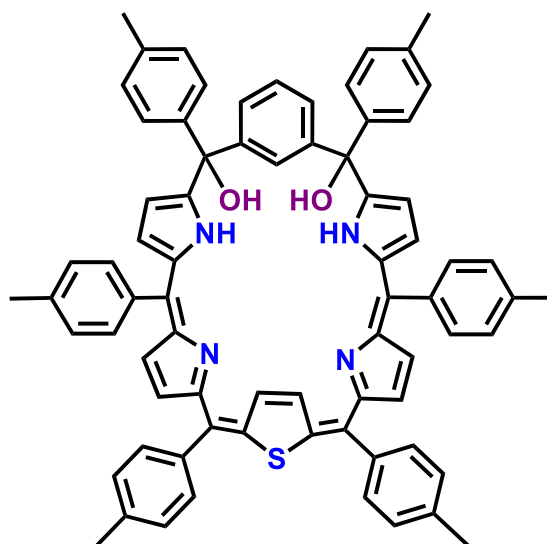Compound **3b**

## DEPARTMENT OF CHEMISTRY, I.I.T.(B)

## Analysis Info

Analysis Name D:\Data\JULY-2023\MR-PV-STOL3-2.d  
 Method NaICsl\_pos\_1500.m  
 Sample Name MR-PV-STOL3-2  
 Comment C74H60N4O2S

Acquisition Date 7/20/2023 4:57:20 PM

Operator PG ROHAN OUT  
 Instrument maXis impact 282001.00081

## Acquisition Parameter

|             |            |                      |          |                  |           |
|-------------|------------|----------------------|----------|------------------|-----------|
| Source Type | ESI        | Ion Polarity         | Positive | Set Nebulizer    | 0.3 Bar   |
| Focus       | Not active | Set Capillary        | 3700 V   | Set Dry Heater   | 180 °C    |
| Scan Begin  | 50 m/z     | Set End Plate Offset | -500 V   | Set Dry Gas      | 4.0 l/min |
| Scan End    | 1500 m/z   | Set Charging Voltage | 2000 V   | Set Divert Valve | Source    |
|             |            | Set Corona           | 0 nA     | Set APCI Heater  | 0 °C      |

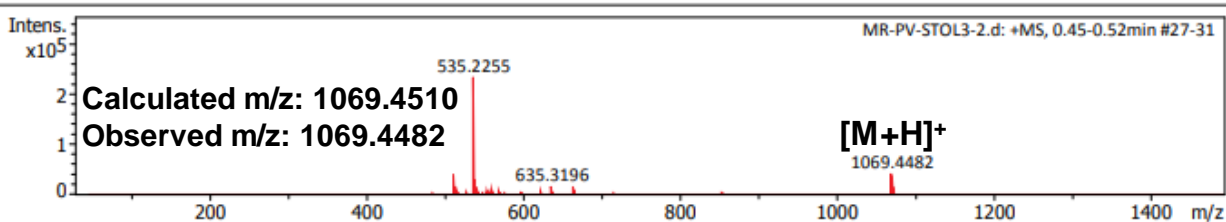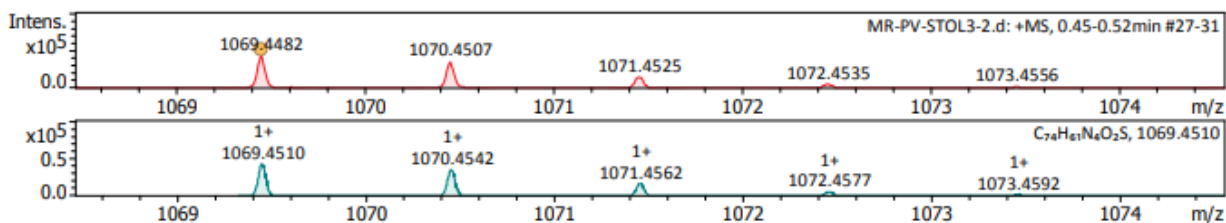

| Meas. m/z | # | Ion Formula                                                     | m/z       | err [ppm] | mSigma | # mSigma | Score  | rdb  | e <sup>-</sup> Conf | N-Rule |
|-----------|---|-----------------------------------------------------------------|-----------|-----------|--------|----------|--------|------|---------------------|--------|
| 1069.4482 | 1 | C <sub>74</sub> H <sub>61</sub> N <sub>4</sub> O <sub>2</sub> S | 1069.4510 | 2.6       | 19.1   | 1        | 100.00 | 49.0 | even                | ok     |

Figure S16. HR mass spectrum of the compound **3b**.

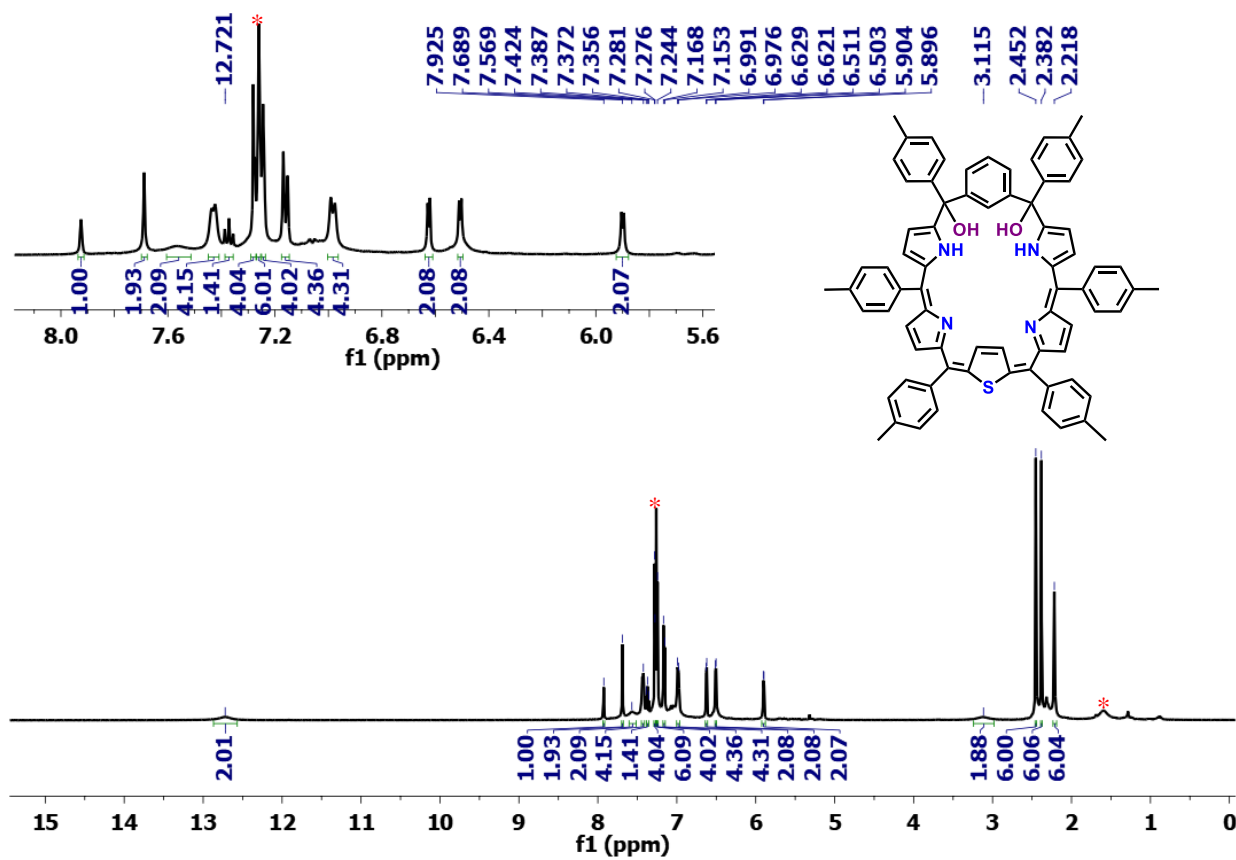

**Figure S17.**  $^1\text{H-NMR}$  spectrum of the compound **3b** recorded in  $\text{CDCl}_3$  at 25 °C on 500 MHz NMR instrument. Note: Peaks marked with asterisk (\*) are due to residual solvents.

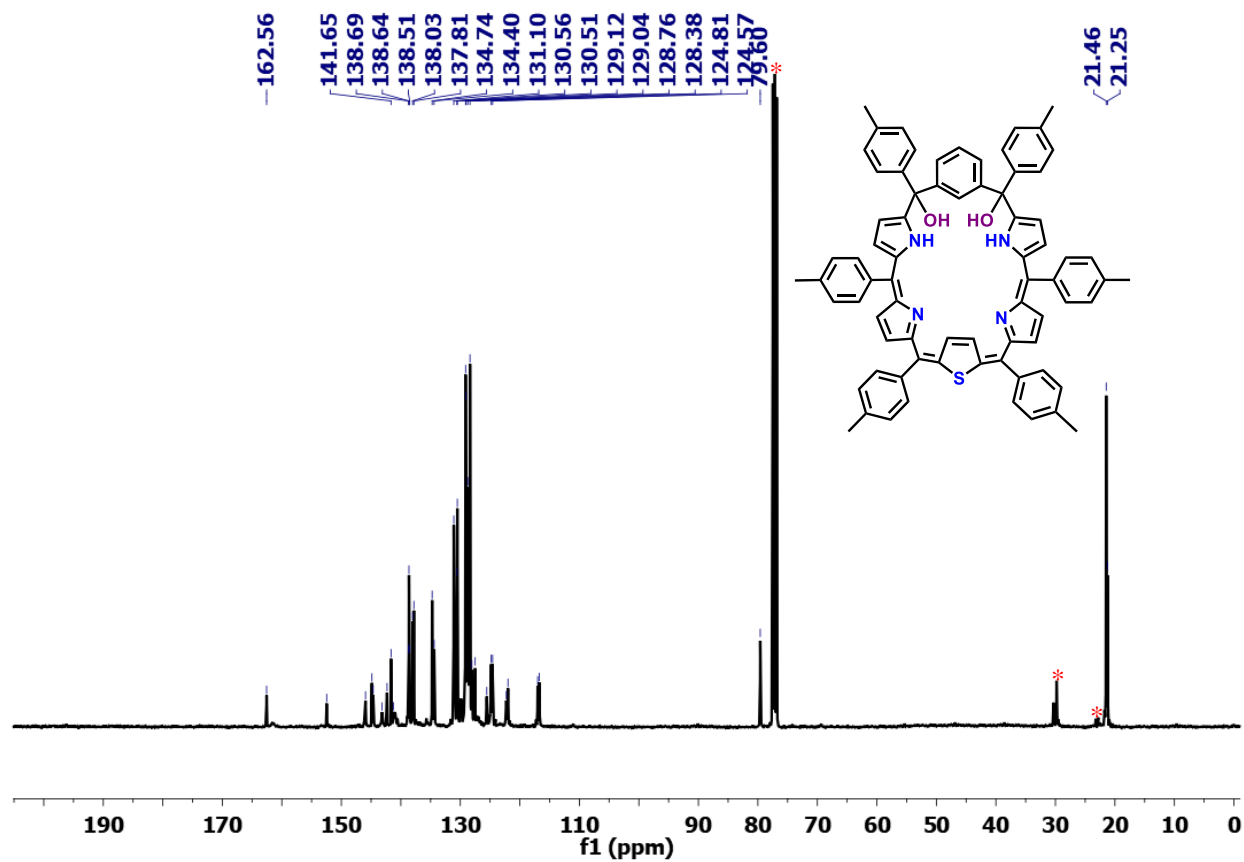

**Figure S18.**  $^{13}\text{C}\{^1\text{H}\}$  NMR spectrum of the compound **3b** recorded in  $\text{CDCl}_3$  on 101 MHz NMR instrument. Note: Peaks marked with asterisk (\*) are due to residual solvents.

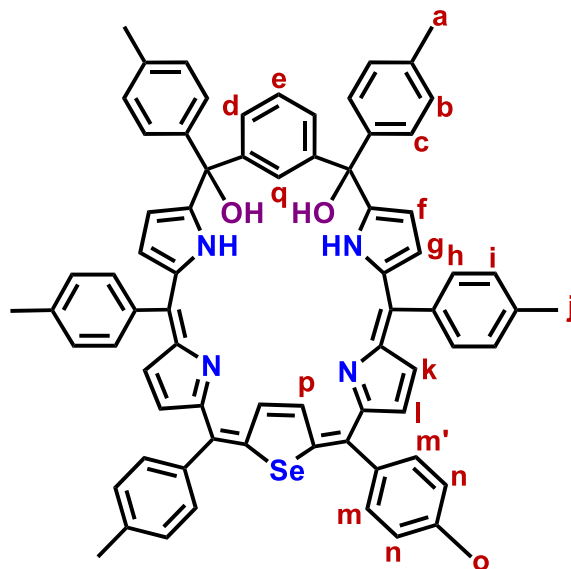

Compound 4

## DEPARTMENT OF CHEMISTRY, I.I.T.(B)

## Analysis Info

Analysis Name D:\Data\MAY-2023\MR-PV-SeMaC.d  
 Method Naformat\_pos\_1500.m  
 Sample Name MR-PV-SeMaC  
 Comment C74H60N4O2Se1

Acquisition Date 5/17/2023 2:36:56 PM

Operator PG ROHAN OUT  
 Instrument maXis impact 282001.00081

## Acquisition Parameter

|             |            |                      |          |                  |           |
|-------------|------------|----------------------|----------|------------------|-----------|
| Source Type | ESI        | Ion Polarity         | Positive | Set Nebulizer    | 0.3 Bar   |
| Focus       | Not active | Set Capillary        | 3700 V   | Set Dry Heater   | 180 °C    |
| Scan Begin  | 100 m/z    | Set End Plate Offset | -500 V   | Set Dry Gas      | 4.0 l/min |
| Scan End    | 1500 m/z   | Set Charging Voltage | 2000 V   | Set Divert Valve | Source    |
|             |            | Set Corona           | 0 nA     | Set APCI Heater  | 0 °C      |

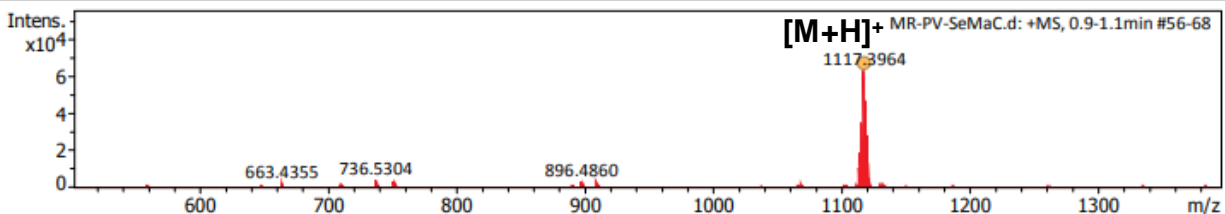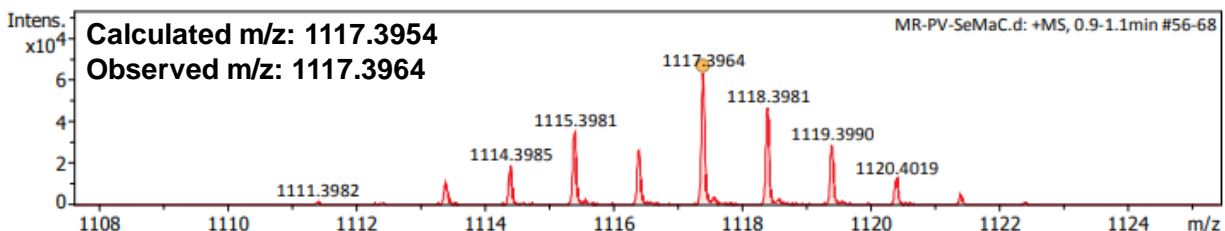

| Meas. m/z | # | Ion Formula  | m/z       | err [ppm] | mSigma | # mSigma | Score  | rdb  | e <sup>-</sup> Conf | N-Rule |
|-----------|---|--------------|-----------|-----------|--------|----------|--------|------|---------------------|--------|
| 1117.3964 | 1 | C74H61N4O2Se | 1117.3954 | 0.2       | 14.1   | 1        | 100.00 | 49.0 | even                | ok     |

Figure S19. HR mass spectrum of the compound 4.

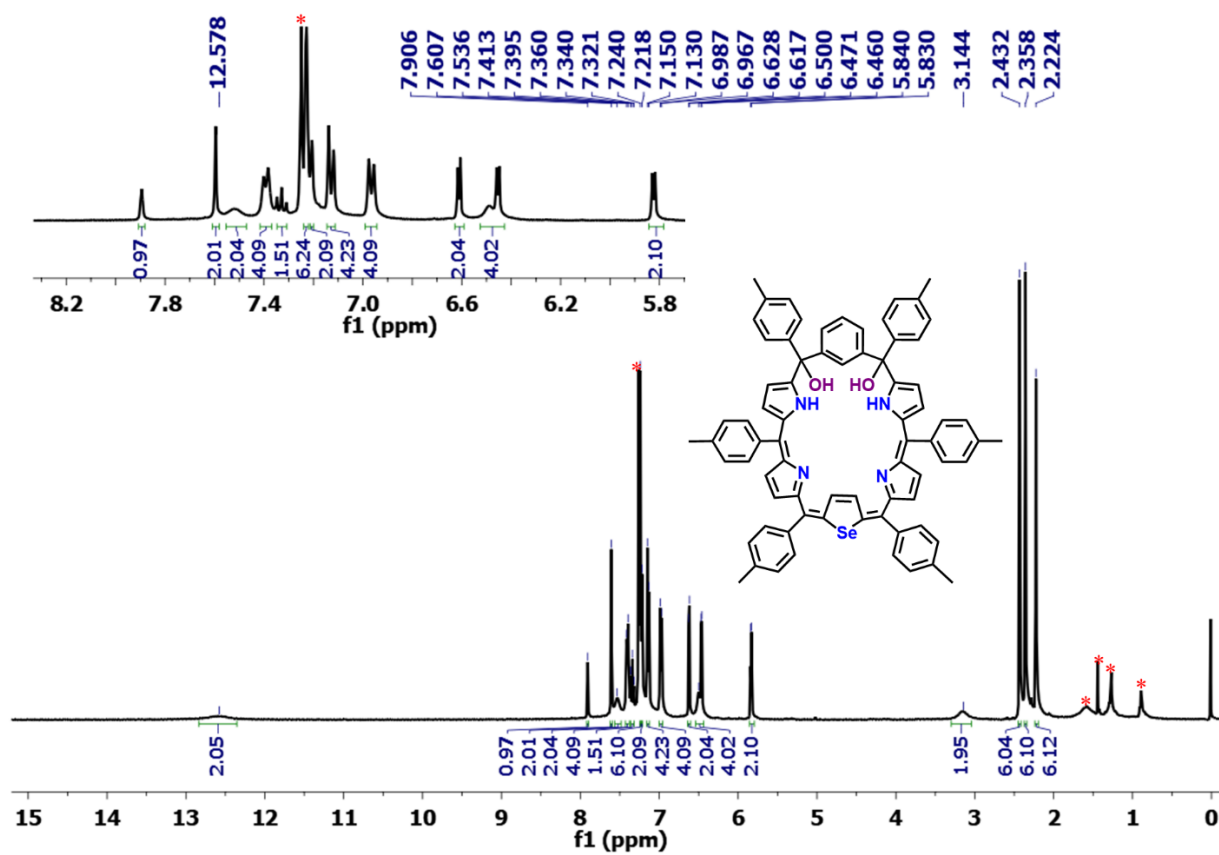

**Figure S20.**  $^1\text{H-NMR}$  spectrum of the compound **4** recorded in  $\text{CDCl}_3$  at  $25\text{ }^\circ\text{C}$  on 400 MHz NMR instrument. Note: Peaks marked with asterisk (\*) are due to residual solvents.

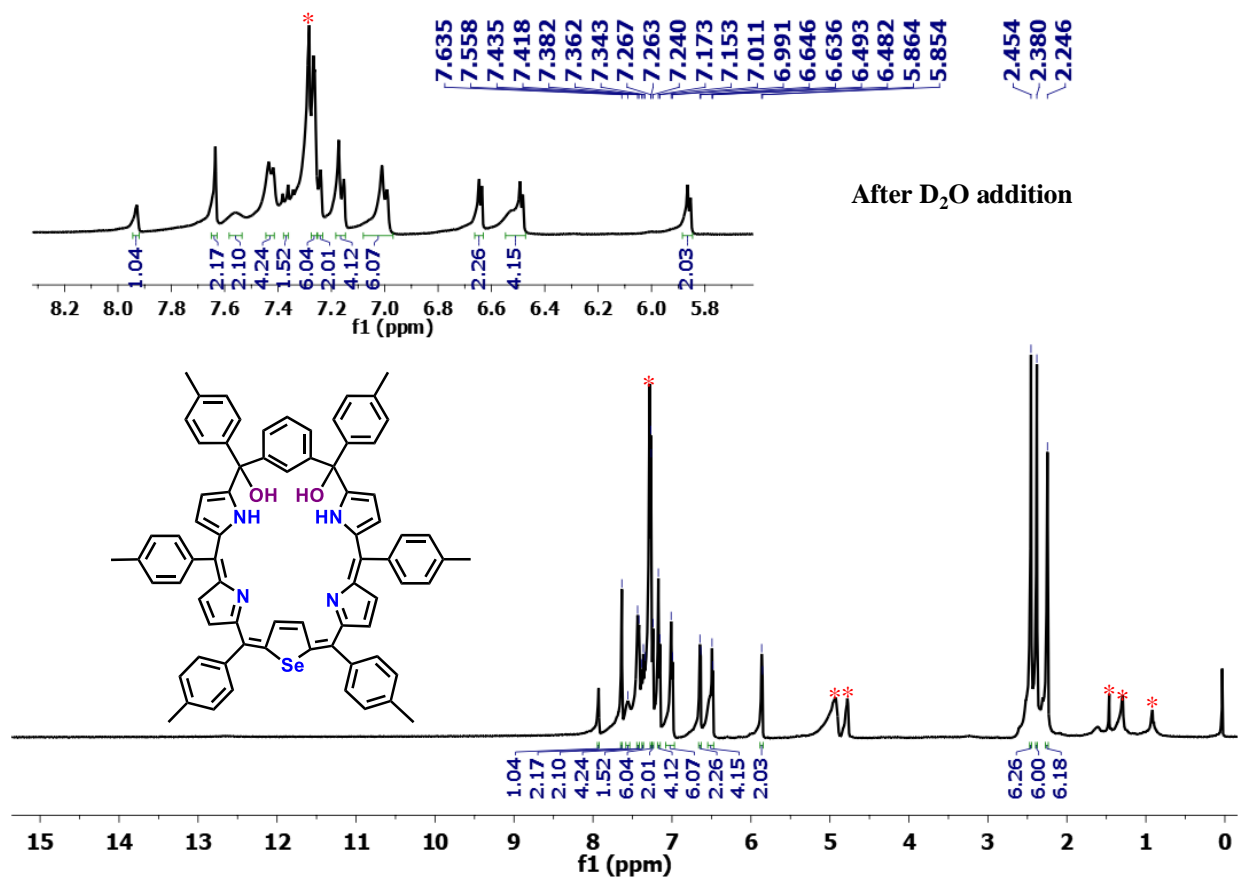

**Figure S21.** <sup>1</sup>H-NMR spectrum of the compound **4** recorded in CDCl<sub>3</sub> after addition of D<sub>2</sub>O at 25 °C on 400 MHz NMR instrument. Note: Peaks marked with asterisk (\*) are due to residual solvents.



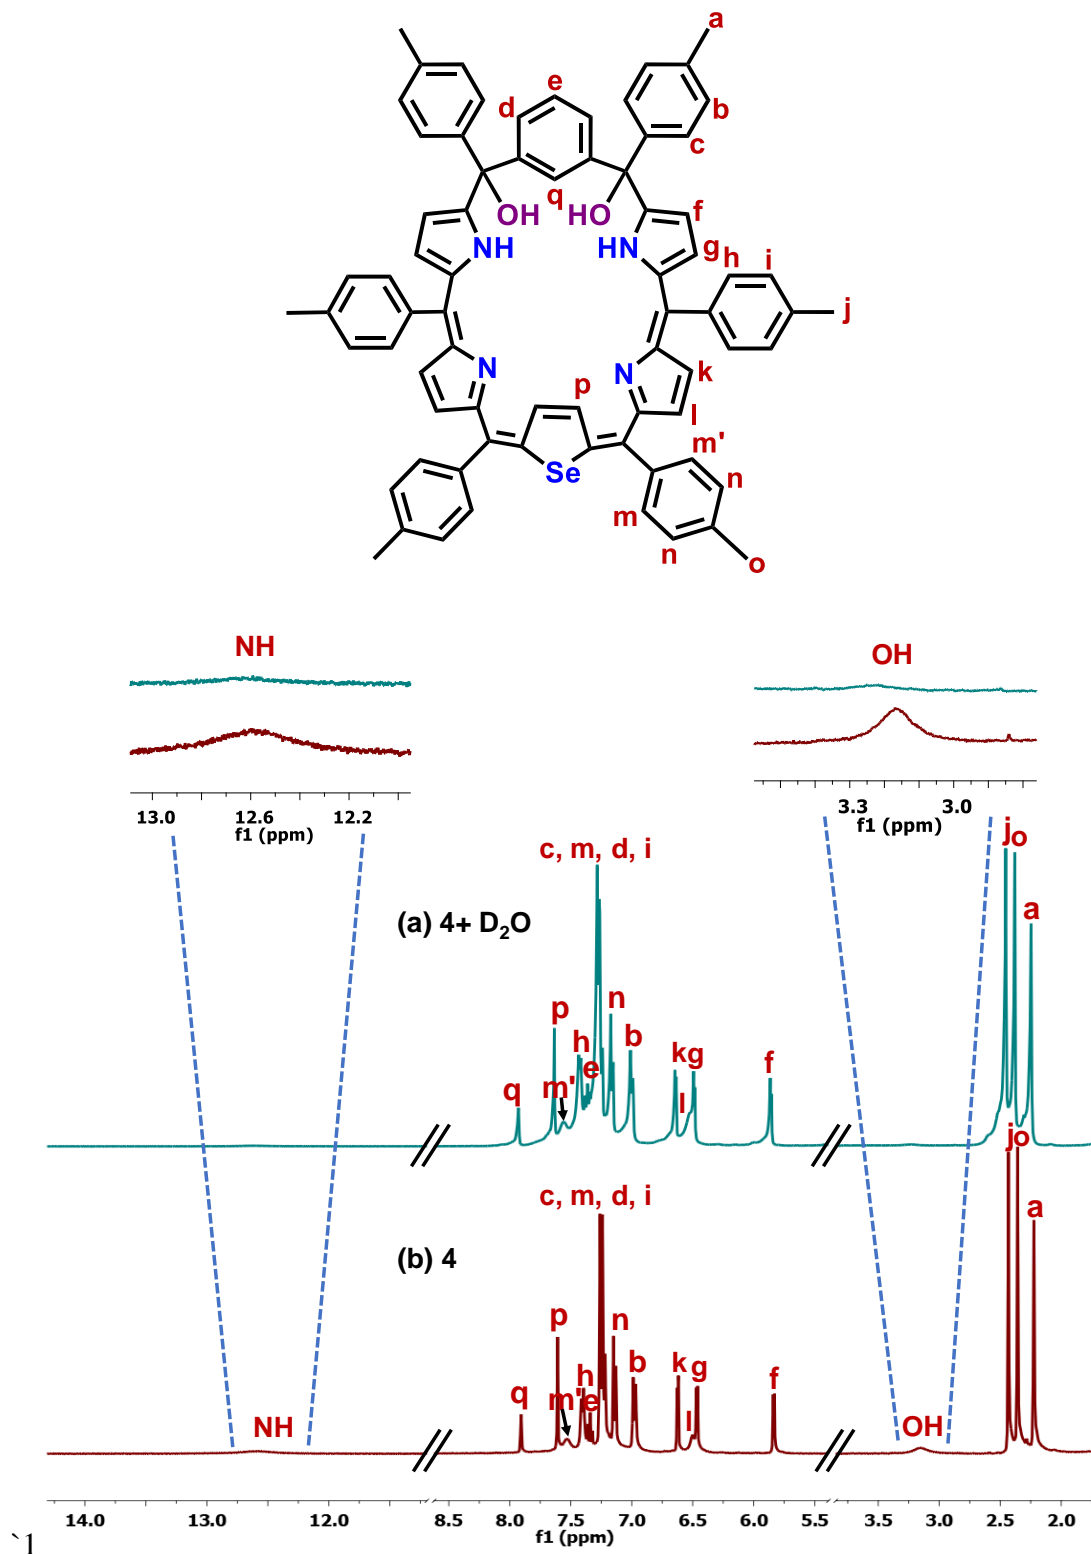

**Figure S22.** Comparison of  $^1\text{H-NMR}$  spectrum of the compound **4** recorded in  $\text{CDCl}_3$  at 298K (a) with  $\text{D}_2\text{O}$  and without  $\text{D}_2\text{O}$  (b) on 400 MHz NMR instrument.

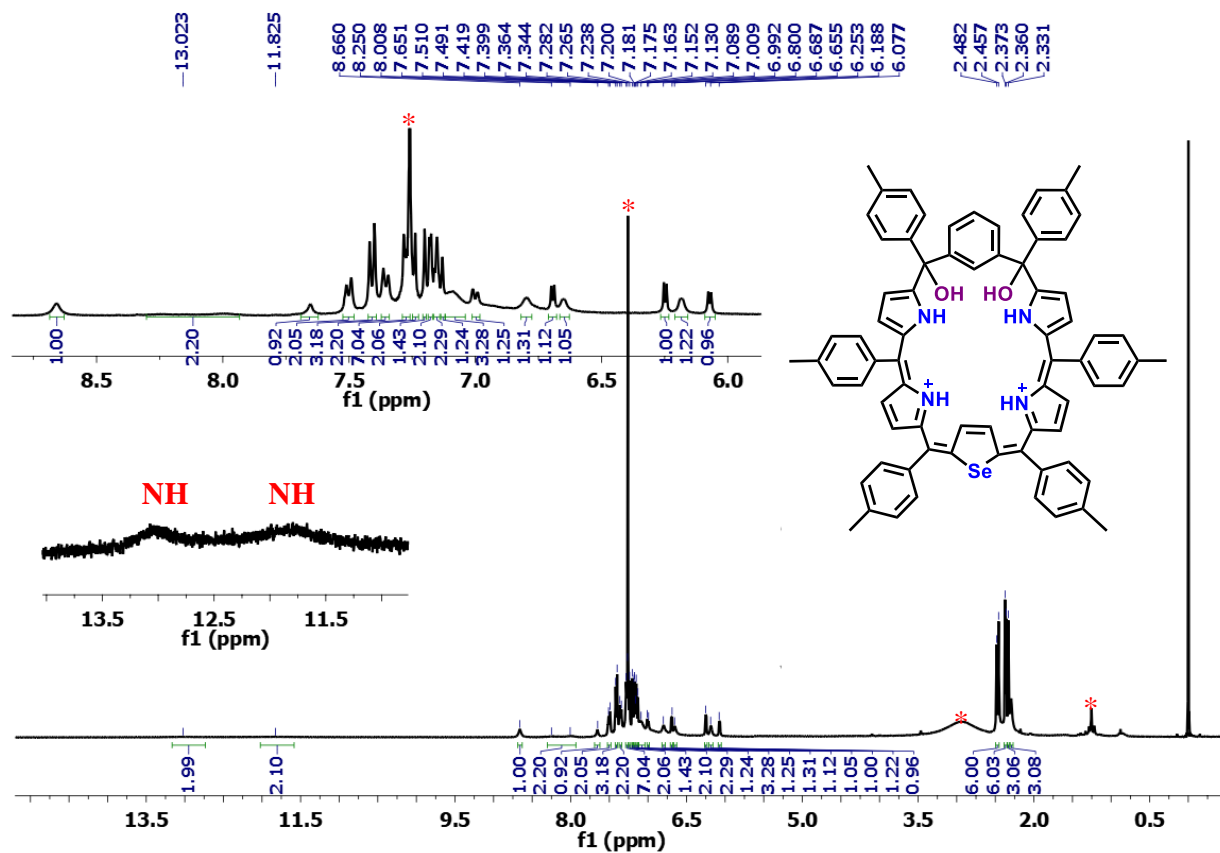

**Figure S23.**  $^1\text{H-NMR}$  spectrum of the compound  $4.2\text{H}^+$  recorded in  $\text{CDCl}_3$  on 400 MHz NMR instrument. Note: Peaks marked with asterisk (\*) are due to residual solvents.

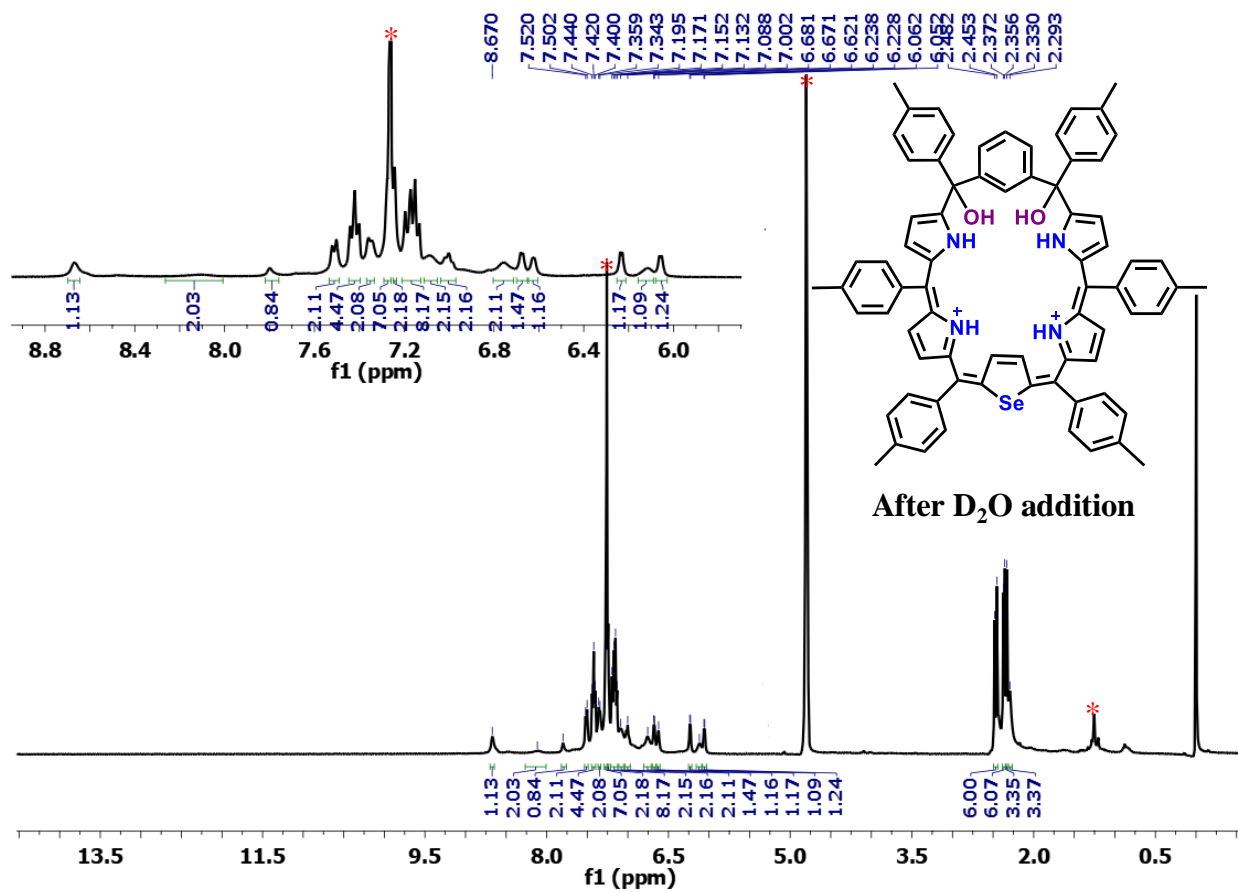

**Figure S24.**  $^1\text{H-NMR}$  spectrum of the compound  $4.2\text{H}^+$  recorded upon addition of  $\text{D}_2\text{O}$  in  $\text{CDCl}_3$  at  $25^\circ\text{C}$  on 400 MHz NMR instrument. Note: Peaks marked with asterisk (\*) are due to residual solvents.

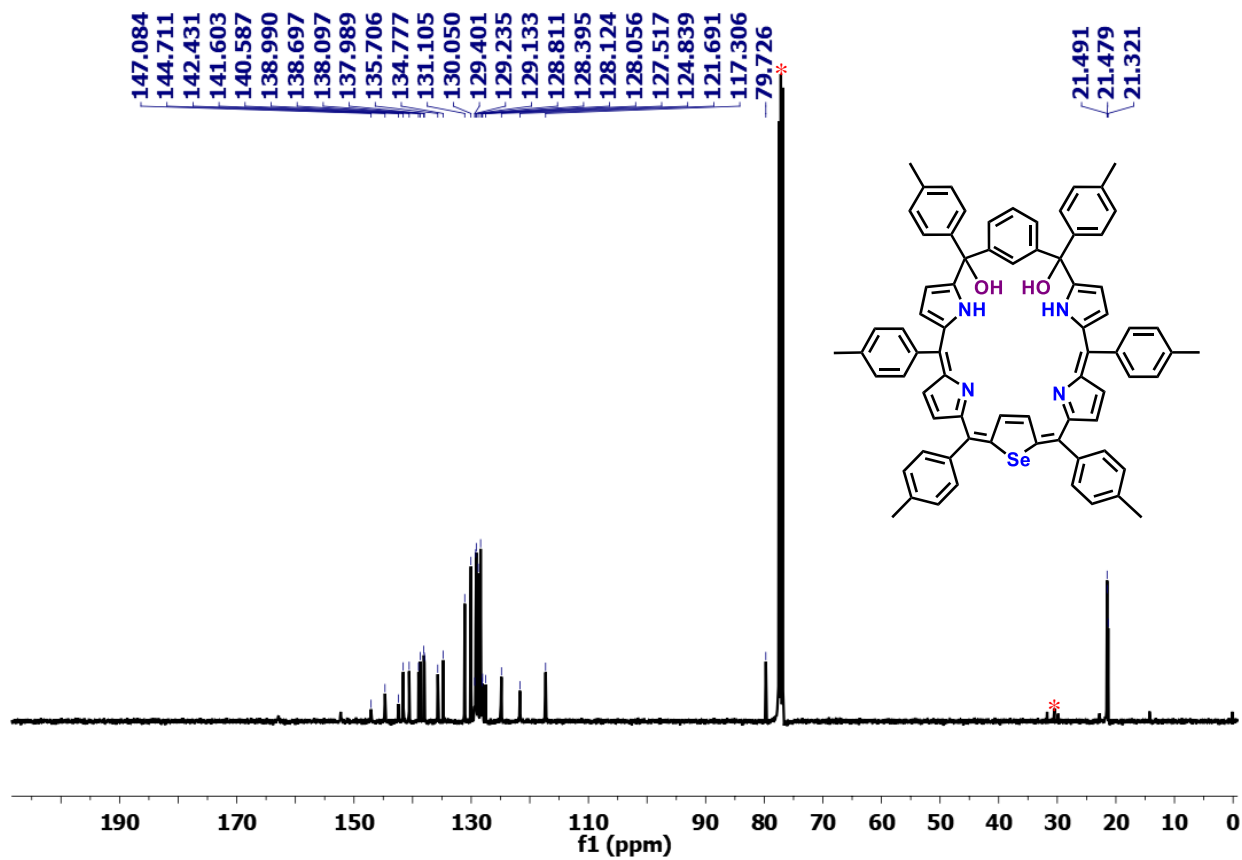

**Figure S25.**  $^{13}\text{C}\{^1\text{H}\}$  NMR spectrum of the compound **3** recorded in  $\text{CDCl}_3$  on 101 MHz NMR instrument. Note: Peaks marked with asterisk (\*) are due to residual solvents.

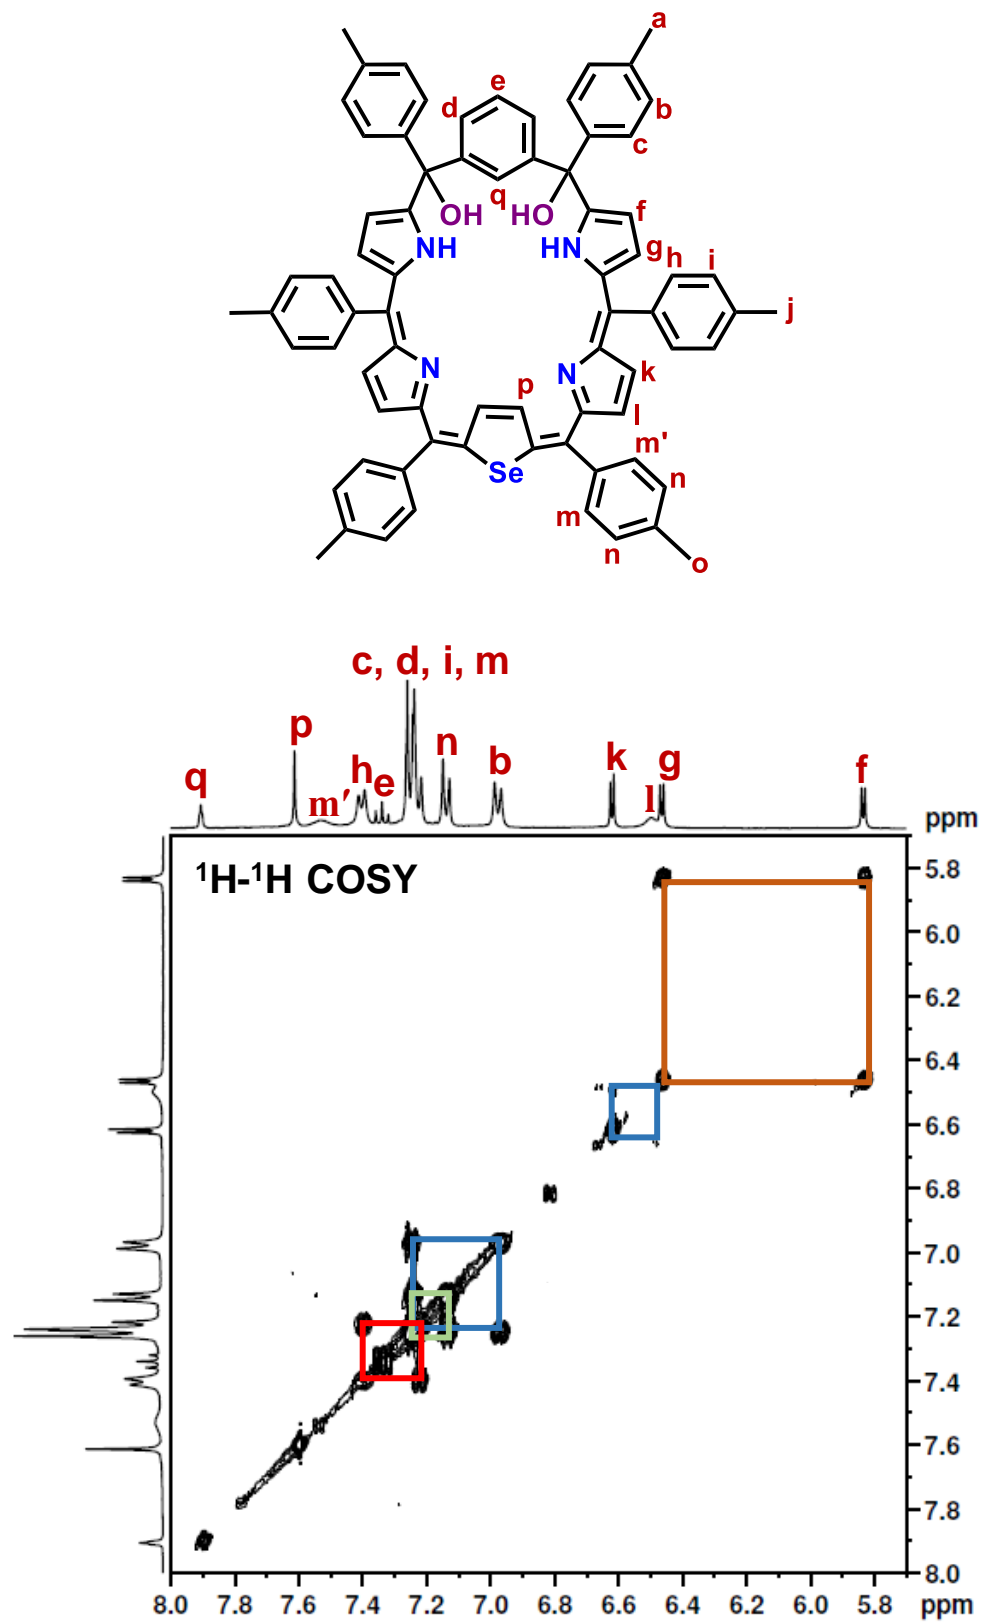

Figure S26.  $^1\text{H}$ - $^1\text{H}$  COSY of compound 4 recorded in  $\text{CDCl}_3$  at 25  $^\circ\text{C}$ .

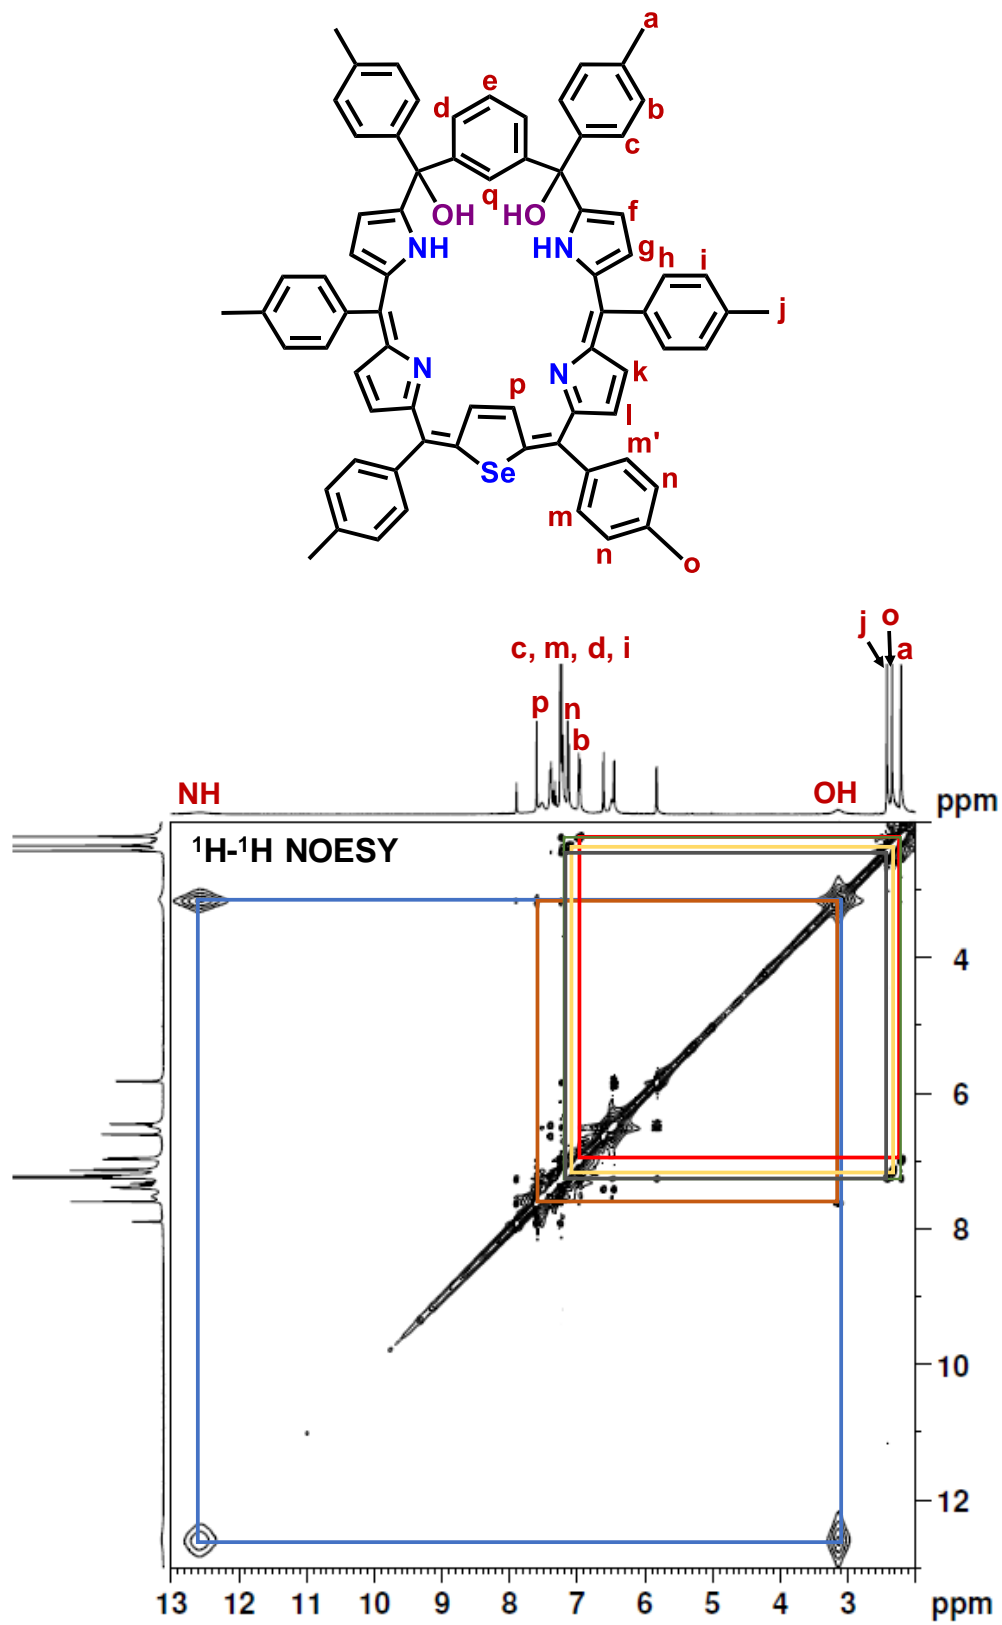

**Figure S27.**  $^1\text{H}$ - $^1\text{H}$  NOESY of compound **4** recorded in  $\text{CDCl}_3$  at 25 °C.

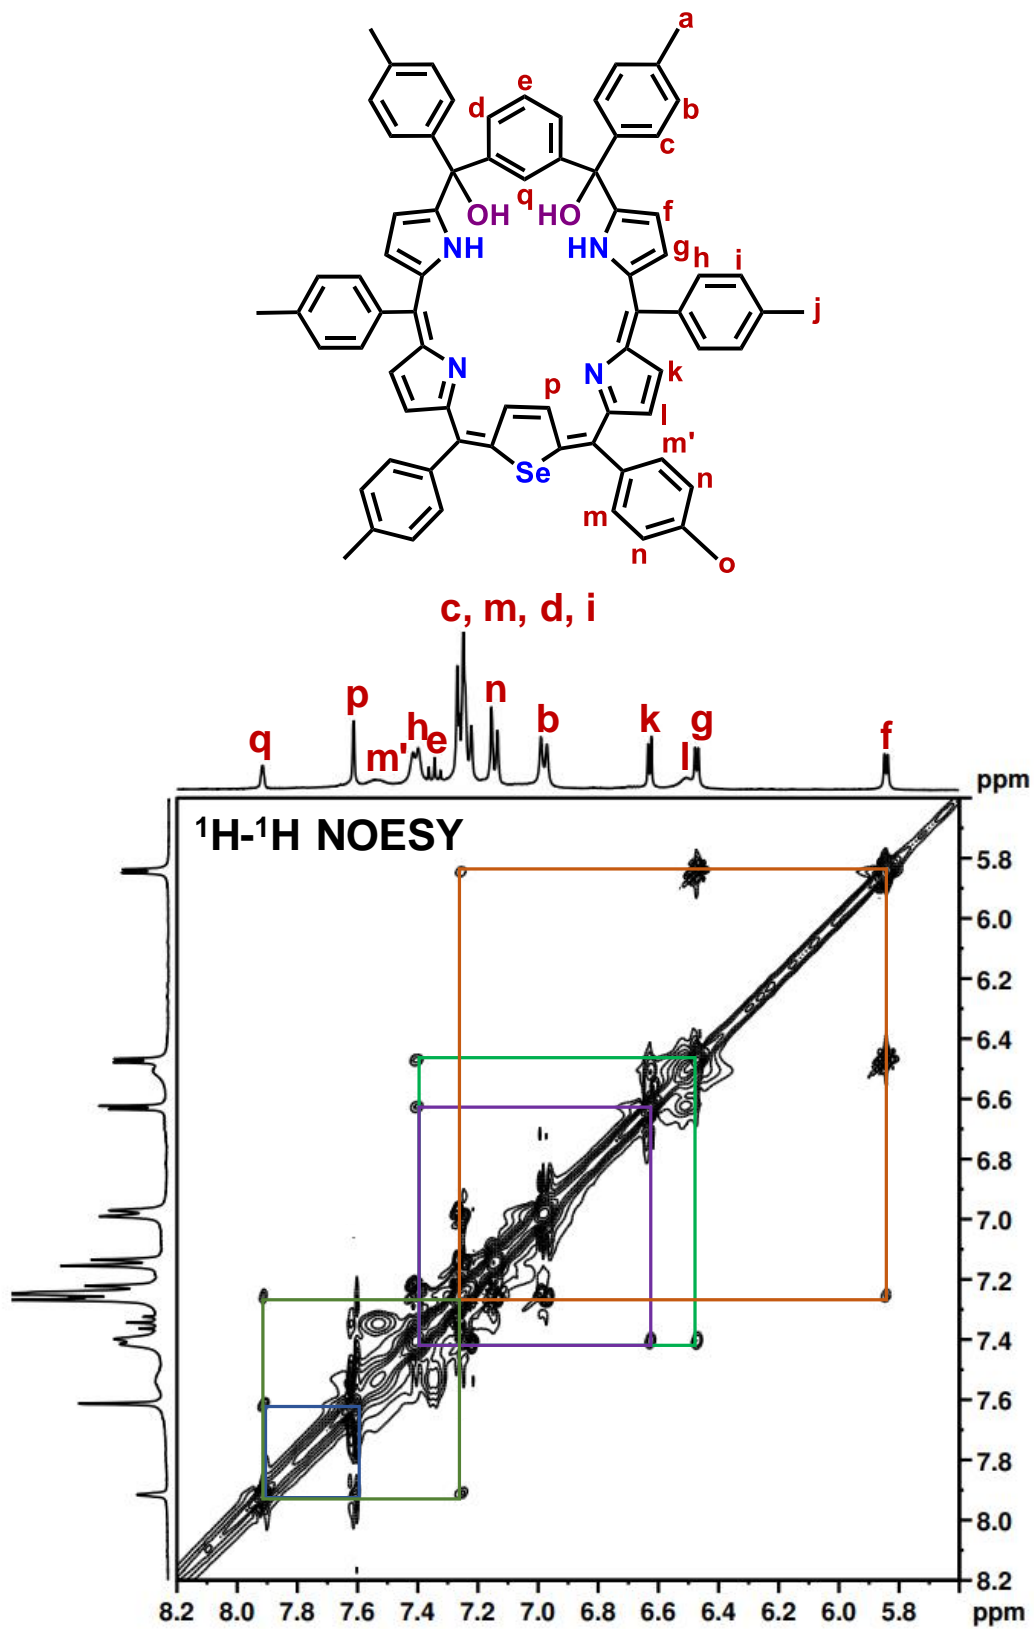

Figure S28. Expanded  $^1\text{H}$ - $^1\text{H}$  NOESY of compound 4 recorded in  $\text{CDCl}_3$  at 25  $^\circ\text{C}$ .

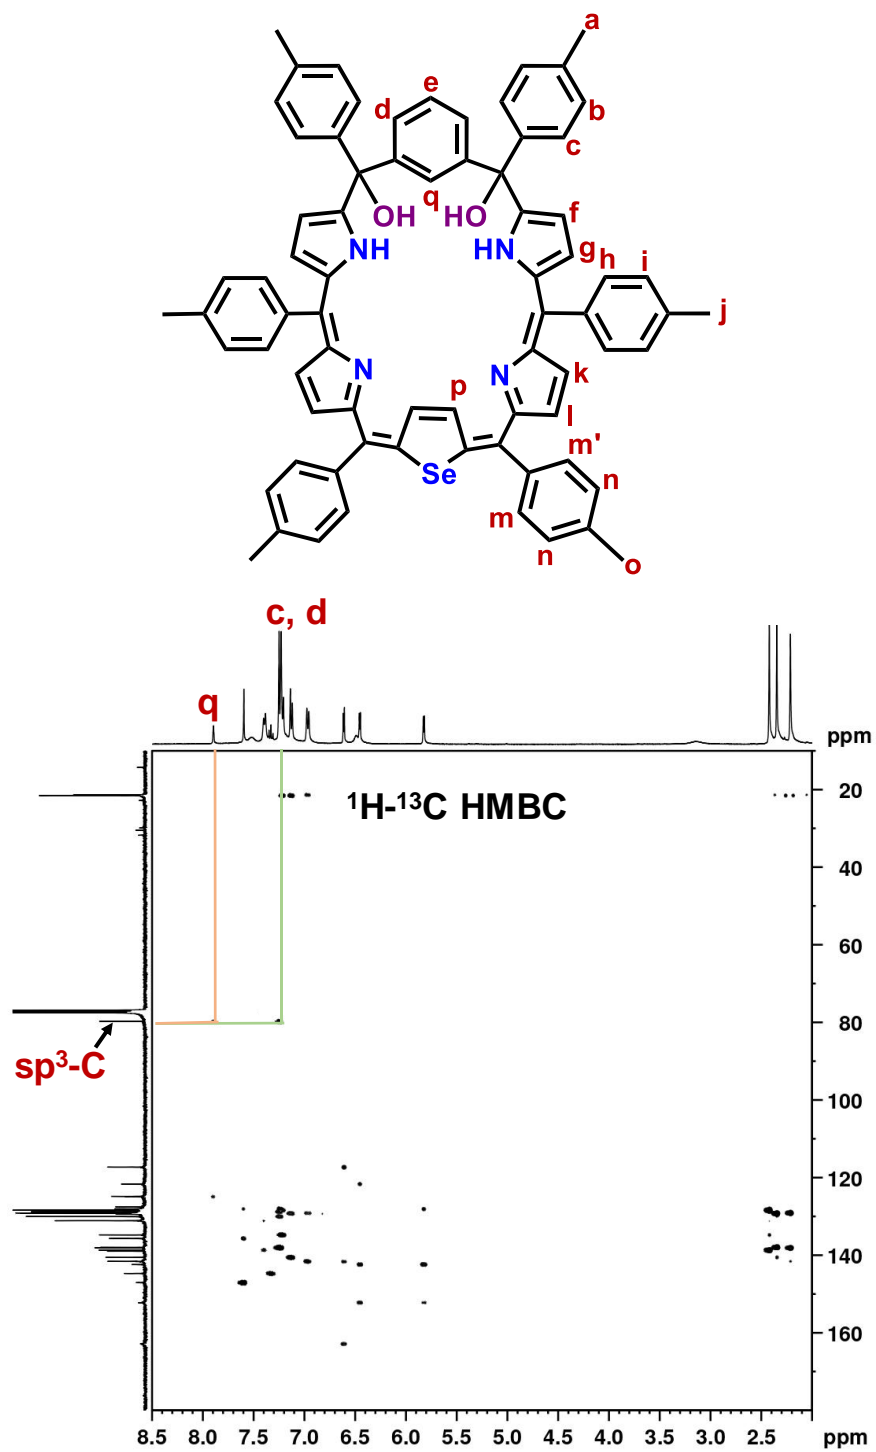

**Figure S29.** Partial  $^1\text{H}$  NMR, partial  $^{13}\text{C}$  NMR and partial  $^1\text{H}$ - $^{13}\text{C}$  HMBC spectra of compound 4 recorded in  $\text{CDCl}_3$  at room temperature at 400 MHz NMR instrument.



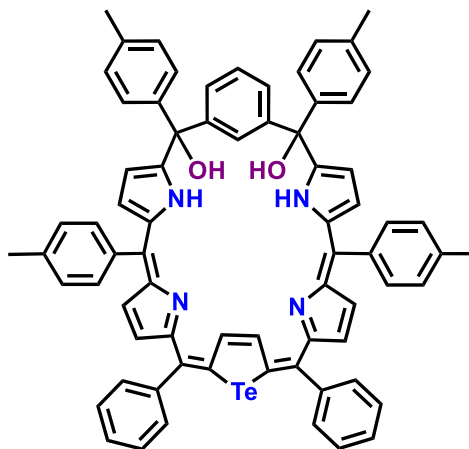

Compound 5

## DEPARTMENT OF CHEMISTRY, I.I.T.(B)

| Analysis Info |                                | Acquisition Date    |                           |
|---------------|--------------------------------|---------------------|---------------------------|
| Analysis Name | D:\Data\JAN-24\MR-PV-TEMAC-3.d | 2/1/2024 6:15:46 PM |                           |
| Method        | Tune_pos_Standard.m            | Operator            | iitb                      |
| Sample Name   | MR-PV-TEMAC-3                  | Instrument          | maXis impact 282001.00081 |
| Comment       | C72H56N4O2Te                   |                     |                           |

| Acquisition Parameter |            | Ion Polarity         | Positive | Set Nebulizer    | 0.3 Bar   |
|-----------------------|------------|----------------------|----------|------------------|-----------|
| Source Type           | ESI        | Set Capillary        | 3700 V   | Set Dry Heater   | 180 °C    |
| Focus                 | Not active | Set End Plate Offset | -500 V   | Set Dry Gas      | 4.0 l/min |
| Scan Begin            | 50 m/z     | Set Charging Voltage | 2000 V   | Set Divert Valve | Source    |
| Scan End              | 1800 m/z   | Set Corona           | 0 nA     | Set APCI Heater  | 0 °C      |

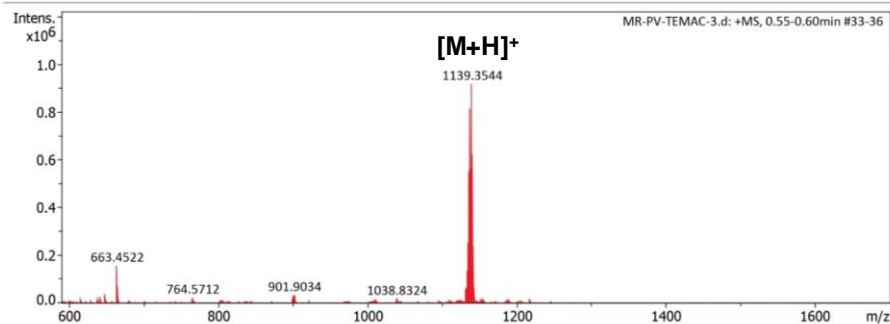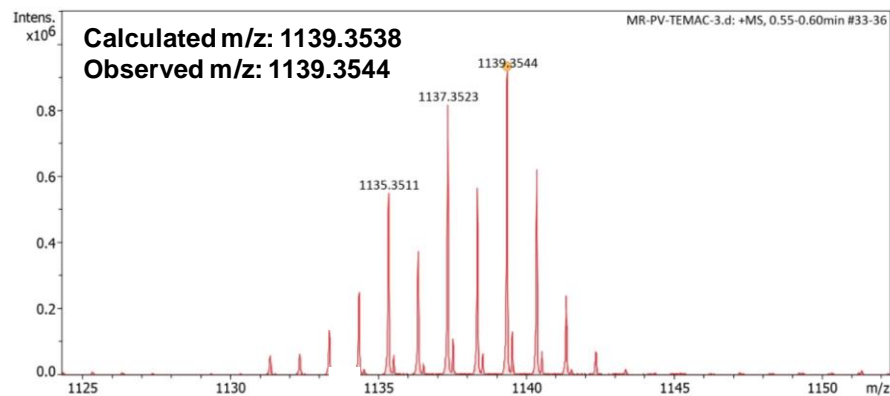

| Meas. m/z | # | Ion Formula  | m/z       | err [ppm] | mSigma | # mSigma | Score  | rdb  | e <sup>-</sup> Conf | N-Rule |
|-----------|---|--------------|-----------|-----------|--------|----------|--------|------|---------------------|--------|
| 1139.3544 | 1 | C72H57N4O2Te | 1139.3538 | 0.5       | 11.0   | 1        | 100.00 | 49.0 | even                | ok     |

Figure S30. HR mass spectrum of the compound 5.

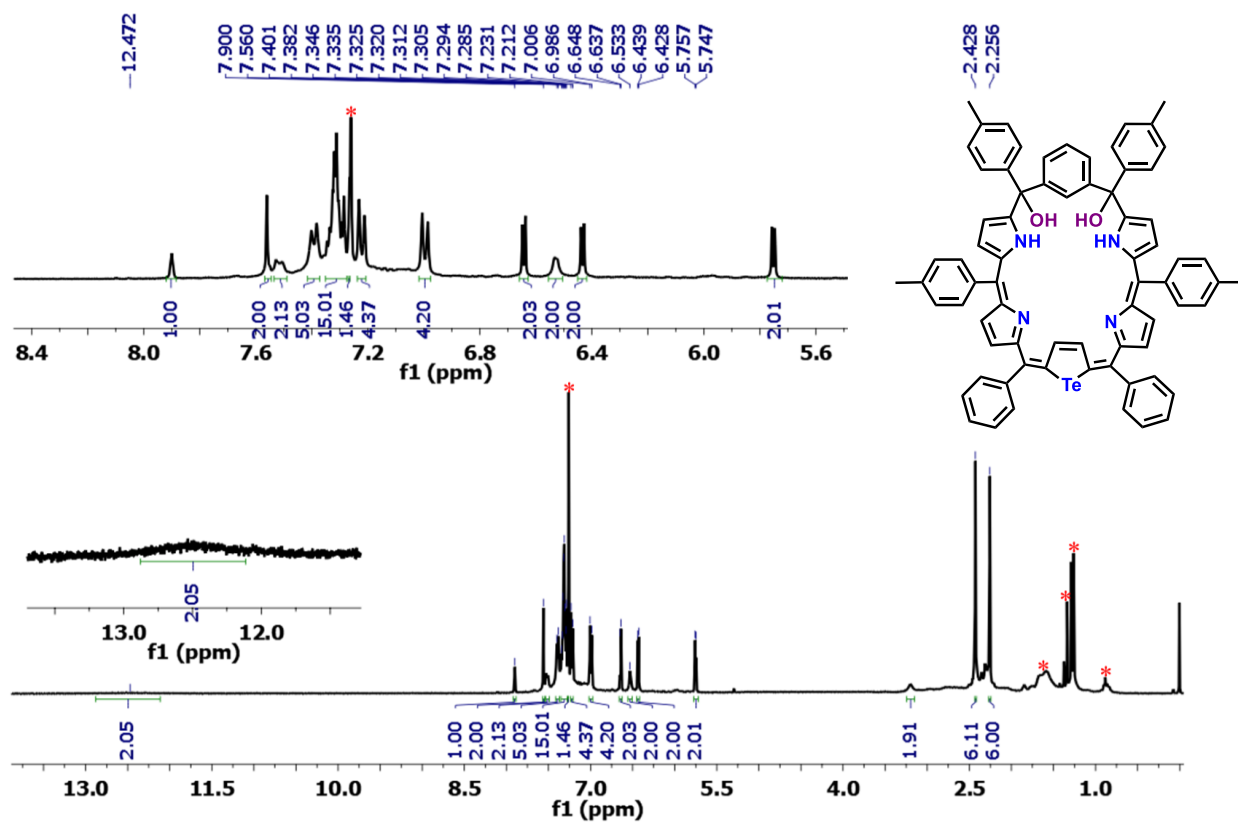

**Figure S31.**  $^1\text{H-NMR}$  spectrum of the compound **5** recorded in  $\text{CDCl}_3$  at  $25\text{ }^\circ\text{C}$  on 400 MHz NMR instrument. Note: Peaks marked with asterisk (\*) are due to residual solvents.

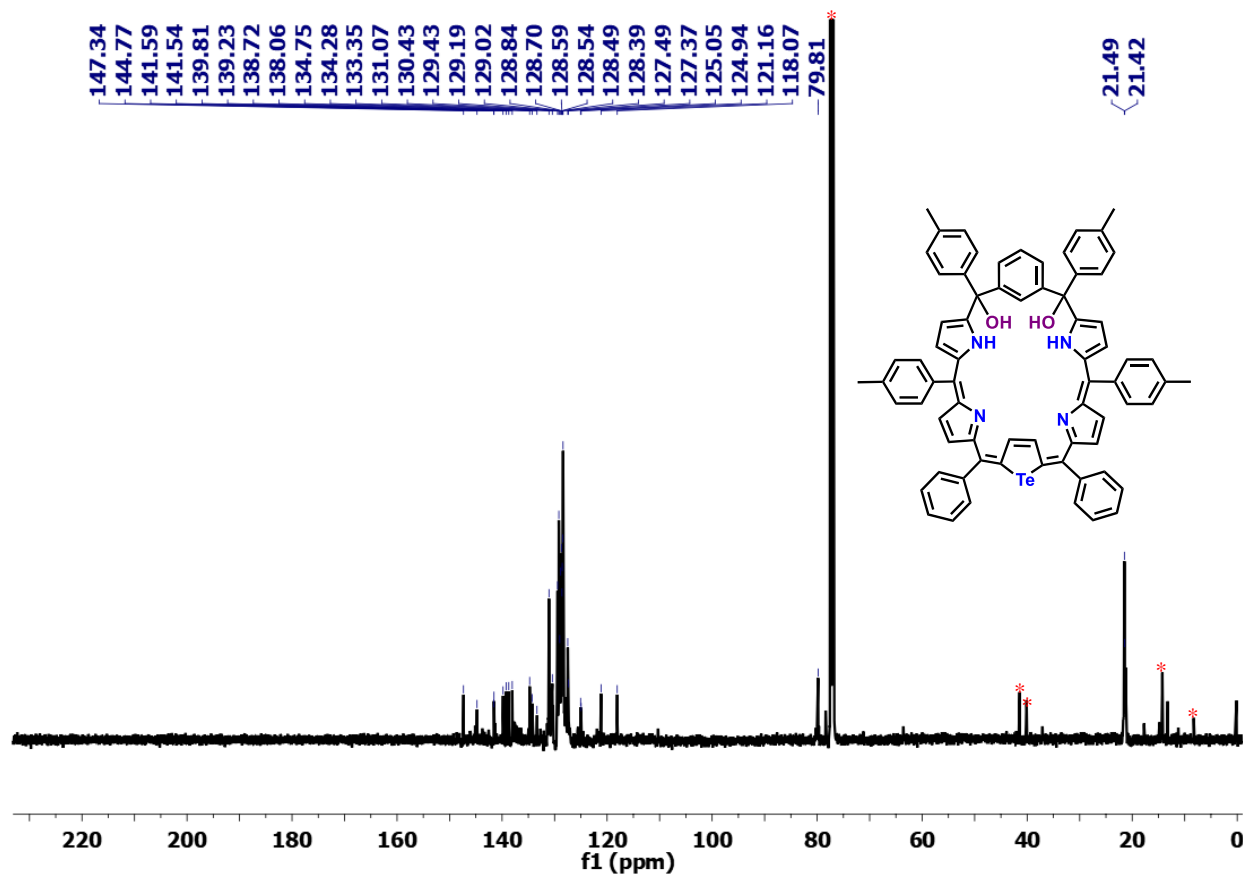

**Figure S32.**  $^{13}\text{C}\{^1\text{H}\}$  NMR spectrum of the compound **5** recorded in  $\text{CDCl}_3$  at 25 °C on 126 MHz NMR instrument. Note: Peaks marked with asterisk (\*) are due to residual solvents.

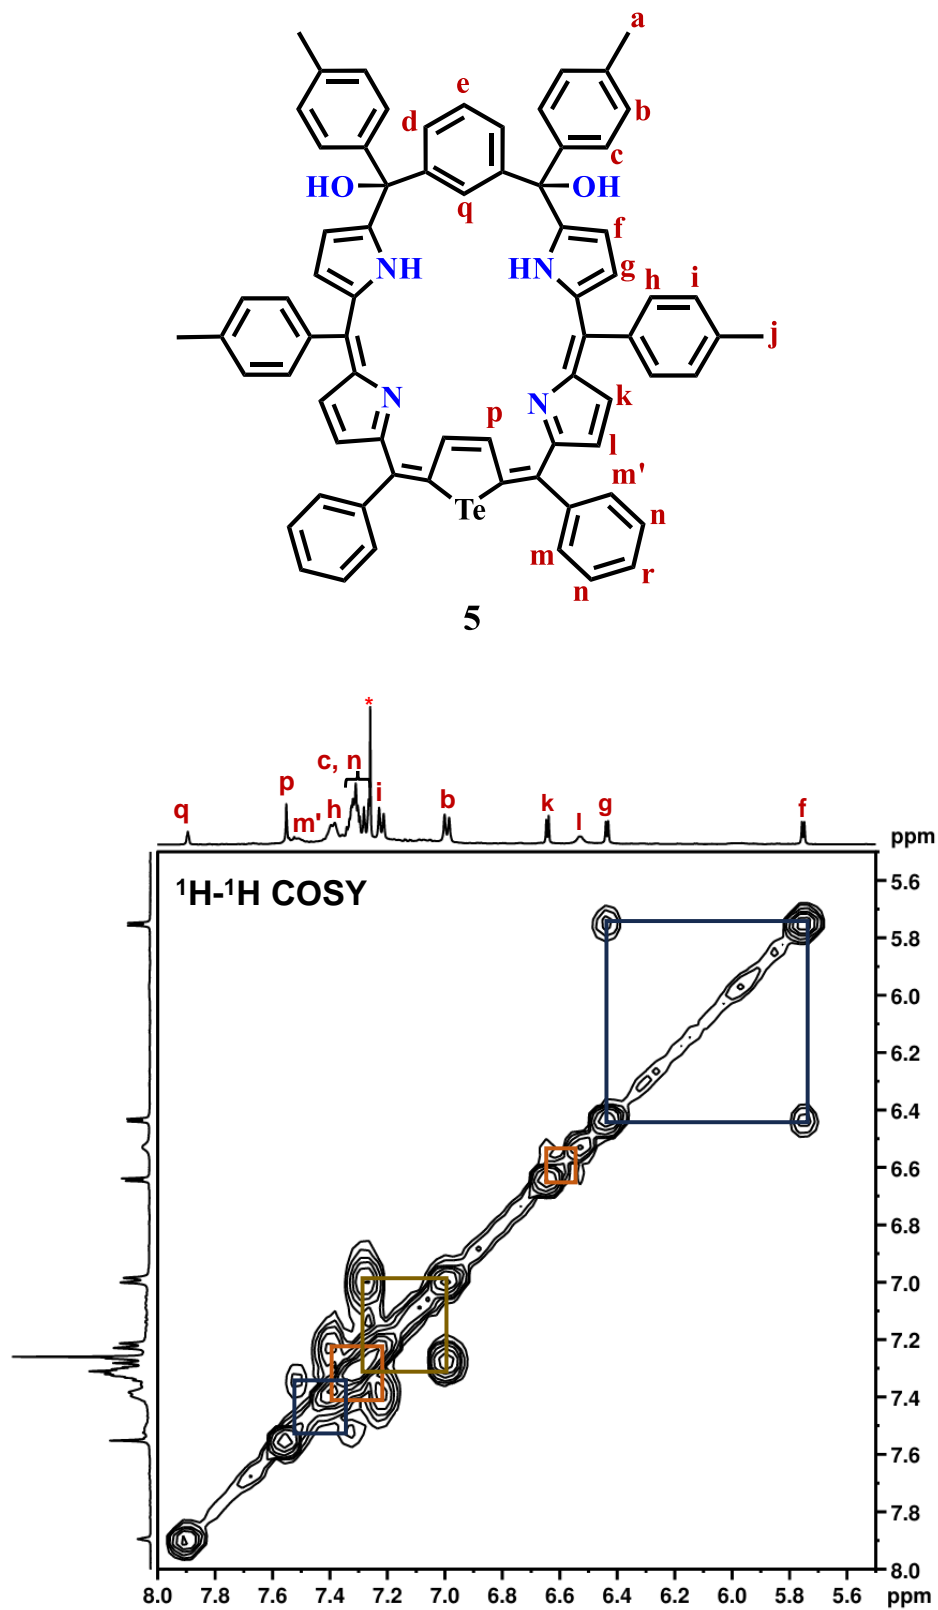

Figure S33.  $^1\text{H}$ - $^1\text{H}$  COSY of compound **5** recorded in  $\text{CDCl}_3$  at 25 °C.

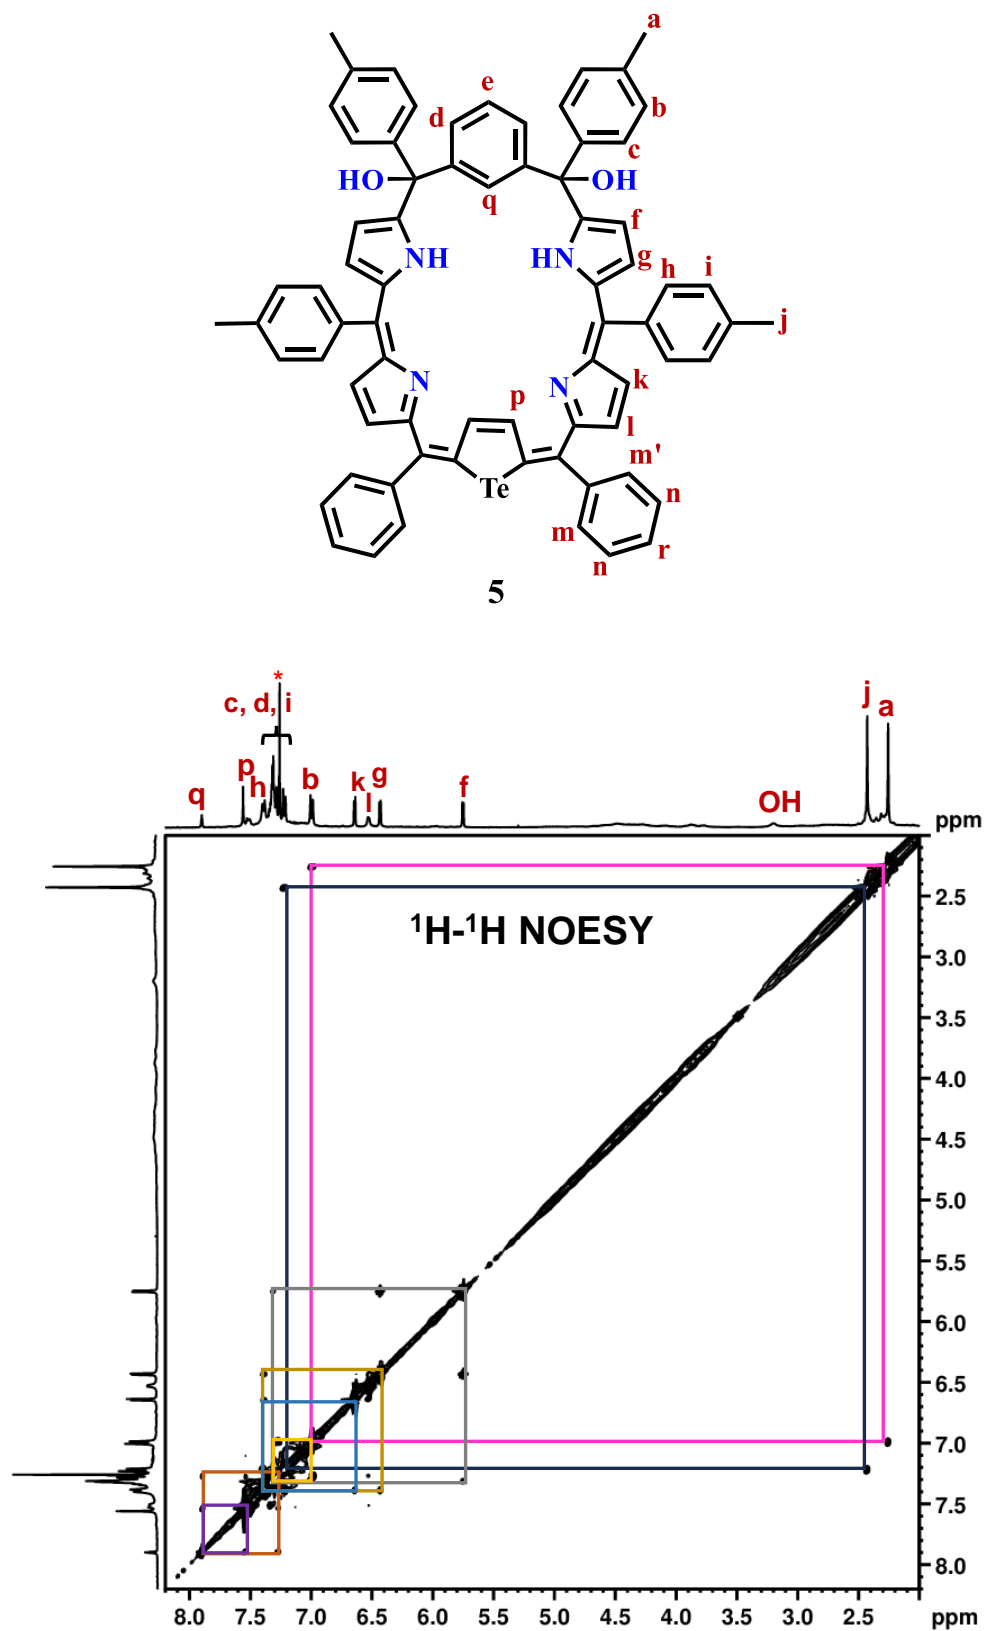

Figure S34.  $^1\text{H}$ - $^1\text{H}$  NOESY of compound **5** recorded in  $\text{CDCl}_3$  at  $25^\circ\text{C}$ .

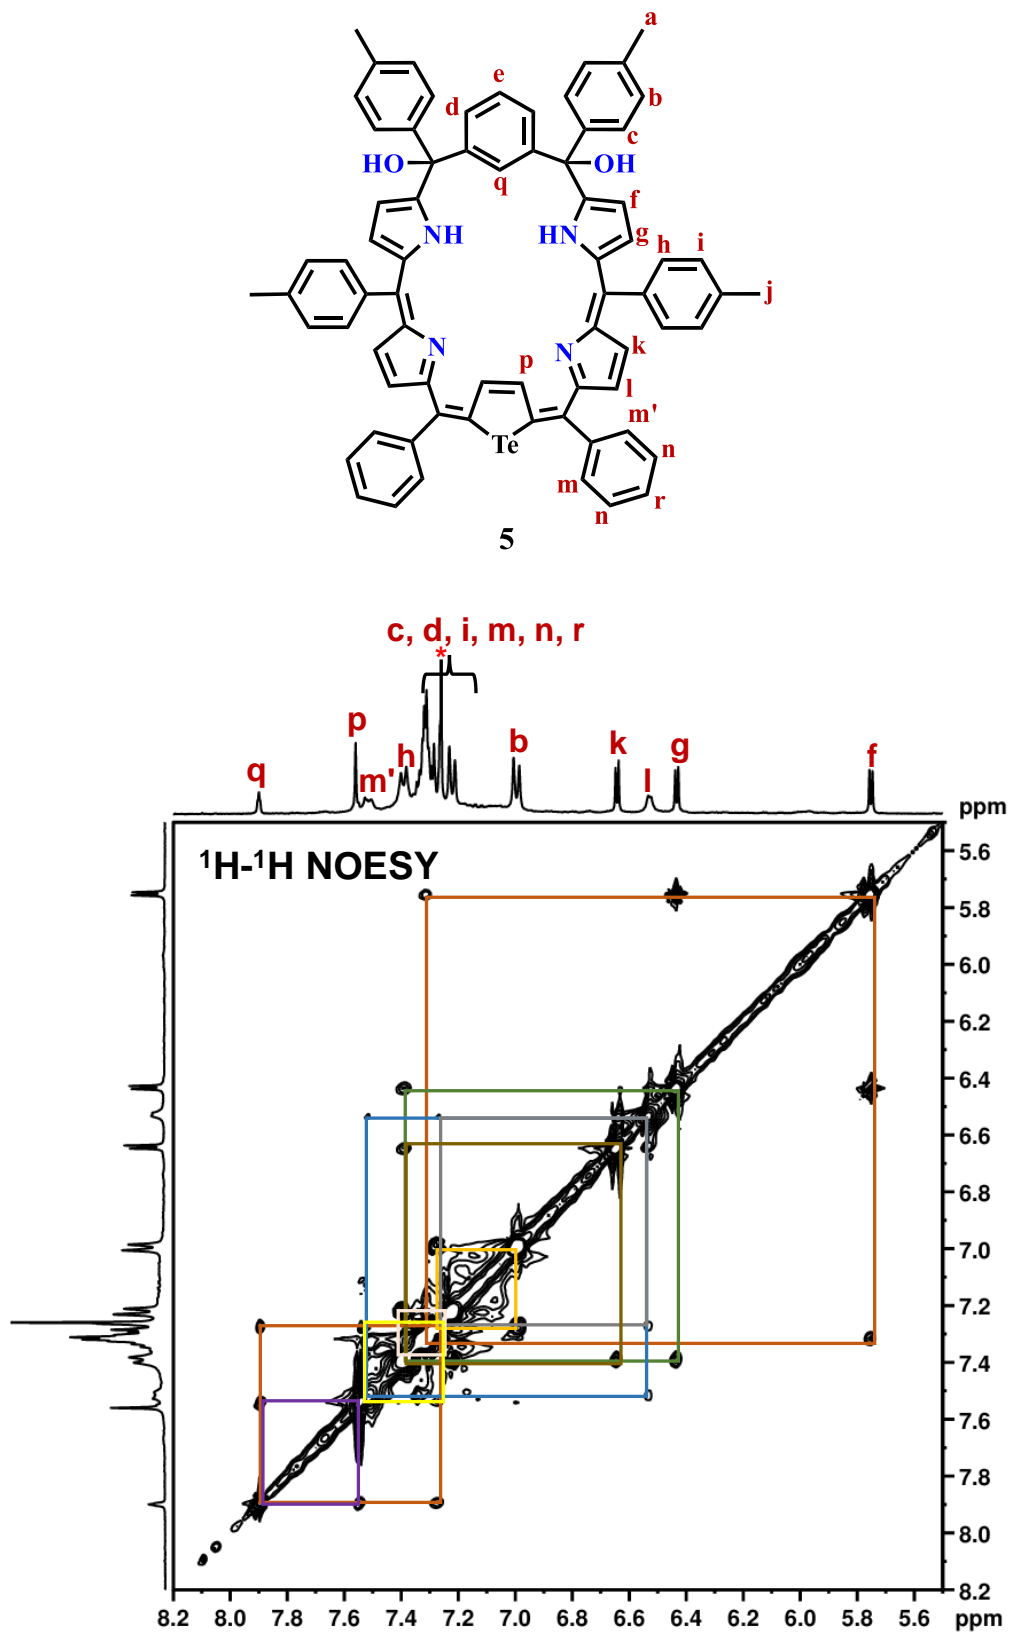

Figure S35. Expanded  $^1\text{H}$ - $^1\text{H}$  NOESY of compound **5** recorded in  $\text{CDCl}_3$  at 25 °C.

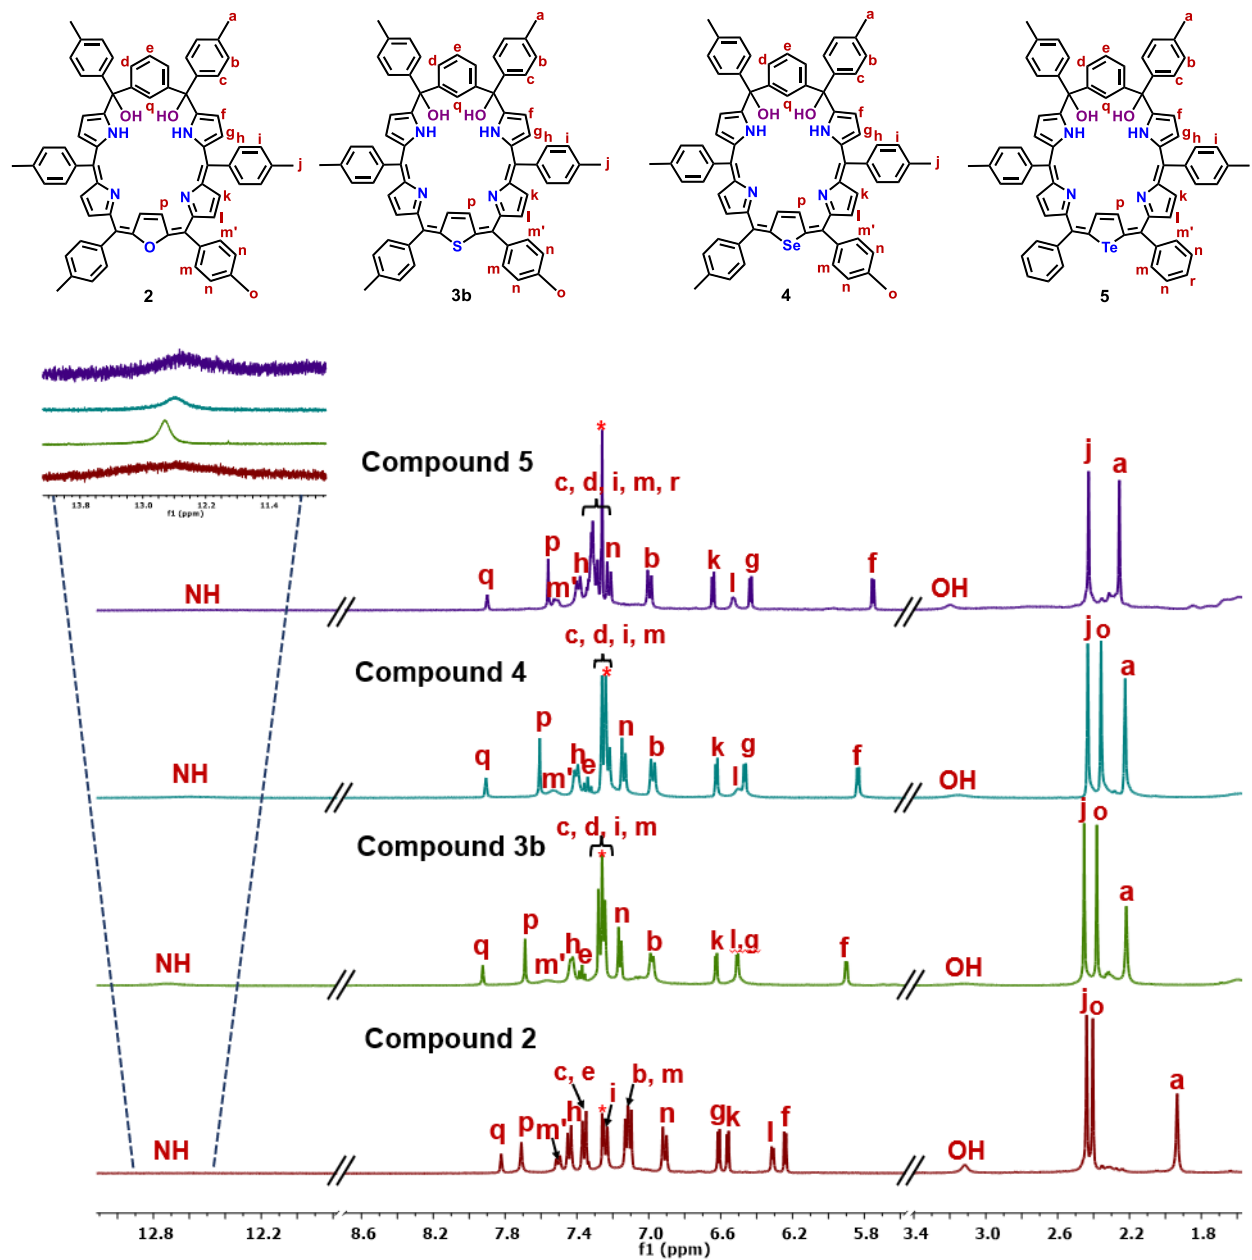

**Figure S36.** Comparison of partial  $^1\text{H-NMR}$  spectra of the compounds 2-5 recorded in  $\text{CDCl}_3$  at  $25^\circ\text{C}$  on 400 MHz NMR instrument. Note: Peaks marked with asterisk (\*) are due to residual solvents.

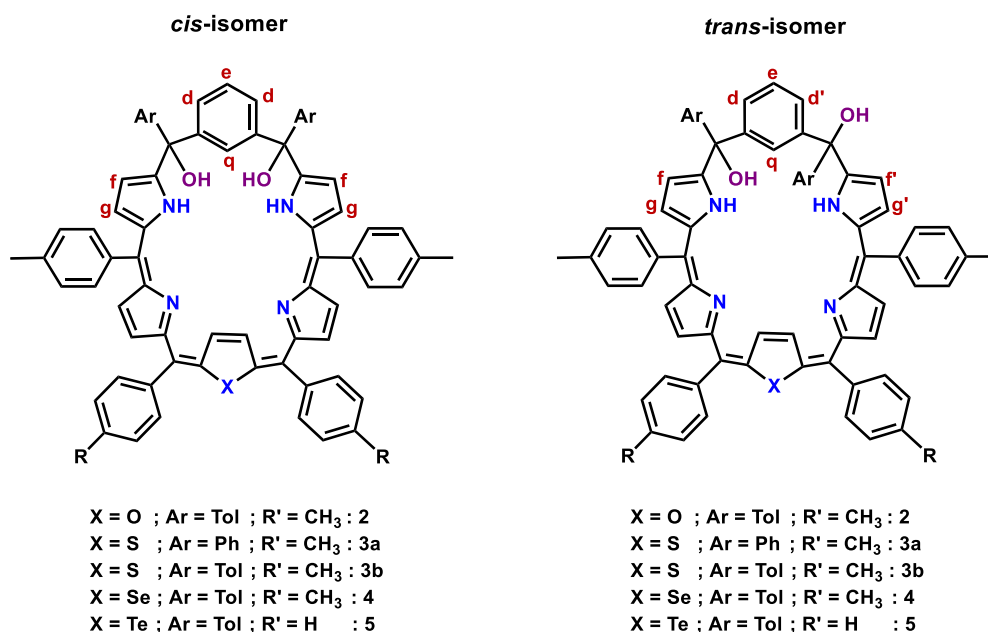

**Figure S37.** *Cis*- and *trans*-isomers of compounds **2-5**.

The  $^1\text{H-NMR}$  spectra for compounds **2-5** are symmetrical, clearly indicating that the two hydroxy groups are in a *cis*-orientation. Moreover, the appearance of one set of  $\beta$ -pyrrole protons (*type f*), corresponding to two protons, reveals that they are in the same chemical environment. If the orientation of the two hydroxy groups were *trans*, the  $^1\text{H-NMR}$  spectra for macrocycles **2-5** would be expected to be unsymmetrical. Additionally, in the  $^1\text{H-}^1\text{H}$  NOESY spectrum of each of the compounds **2-5**, we would anticipate spatial correlations between the  $\beta$ -pyrrole proton and the *meso*-aryl proton (*type c*), while such correlations should be absent for the  $\beta$ -pyrrole proton that is distant from the *meso*-aryl proton (*type c*). However, we observed solely symmetrical  $^1\text{H-NMR}$  spectra, conclusively indicating that the two hydroxy groups are in a *cis*-orientation in all the macrocycles **2-5**.



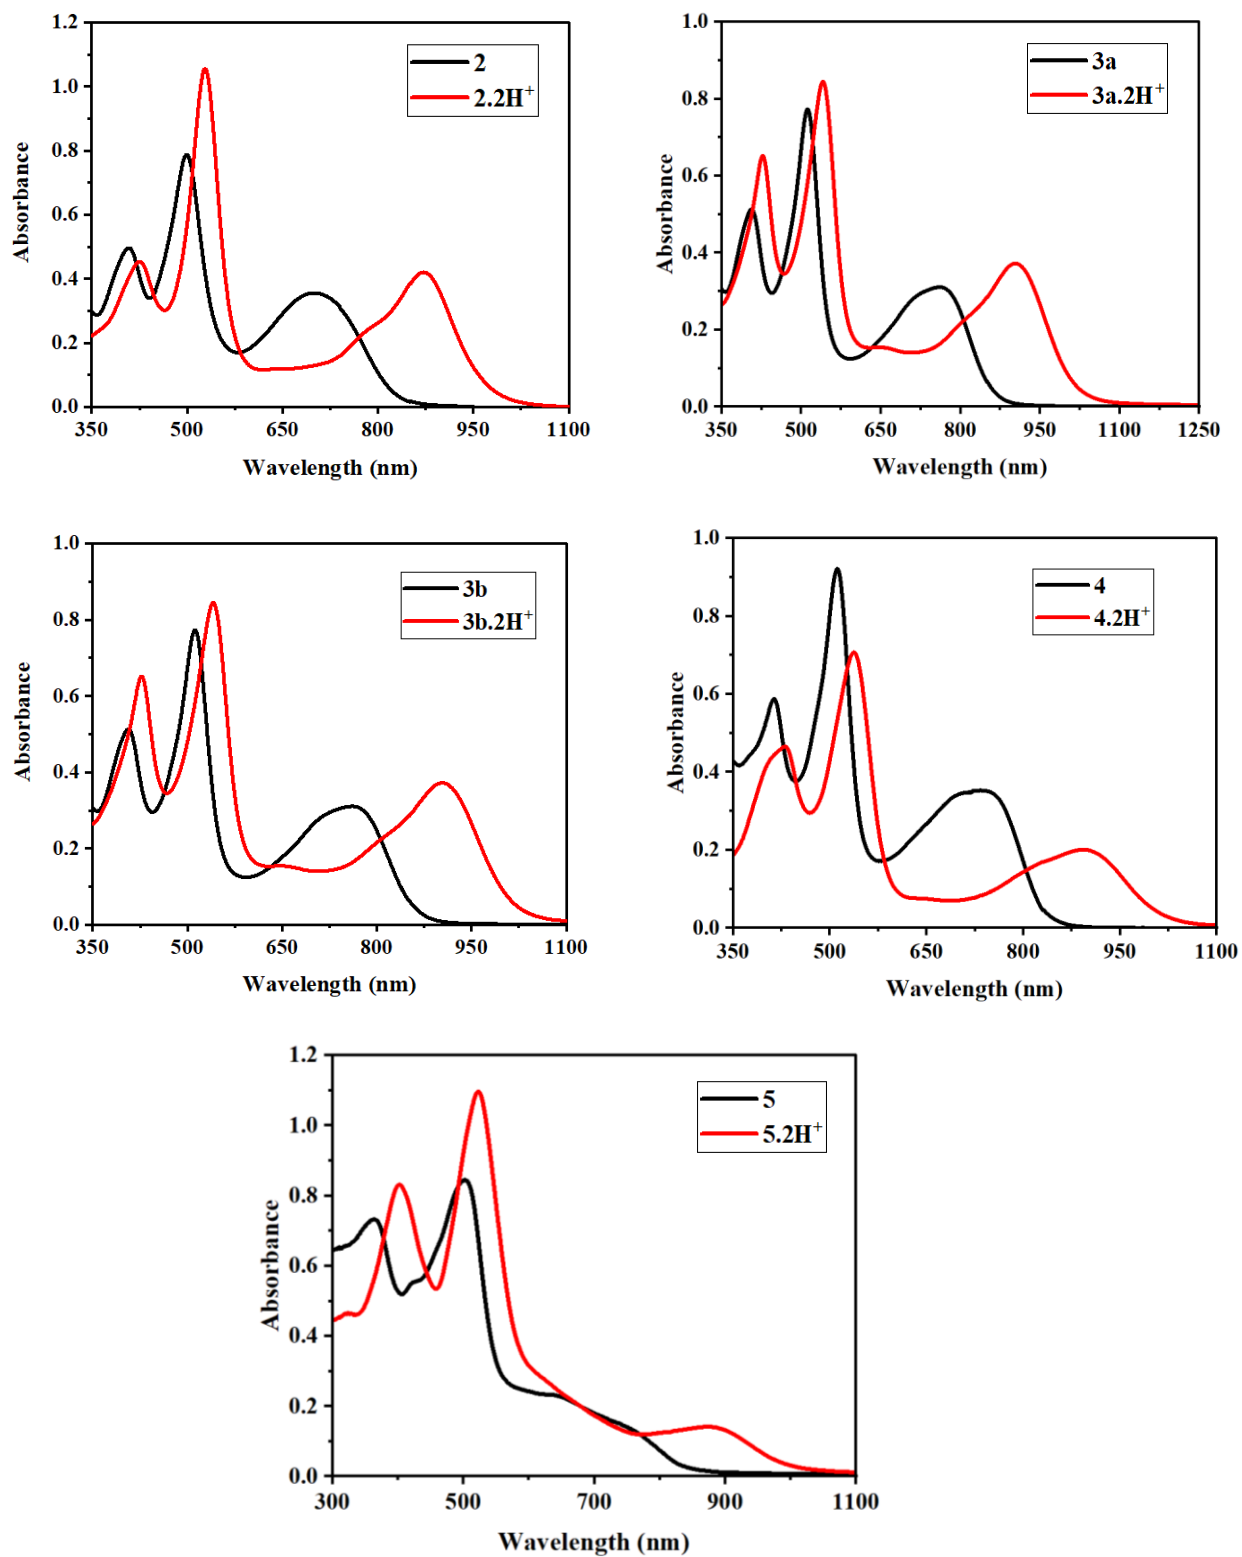

**Figure S38.** Comparison of absorption spectra of the compounds 2-5 ( $2 \times 10^{-5}$  M) free base (black line) and in presence of TFA (excess) (red line) recorded in chloroform at room temperature.

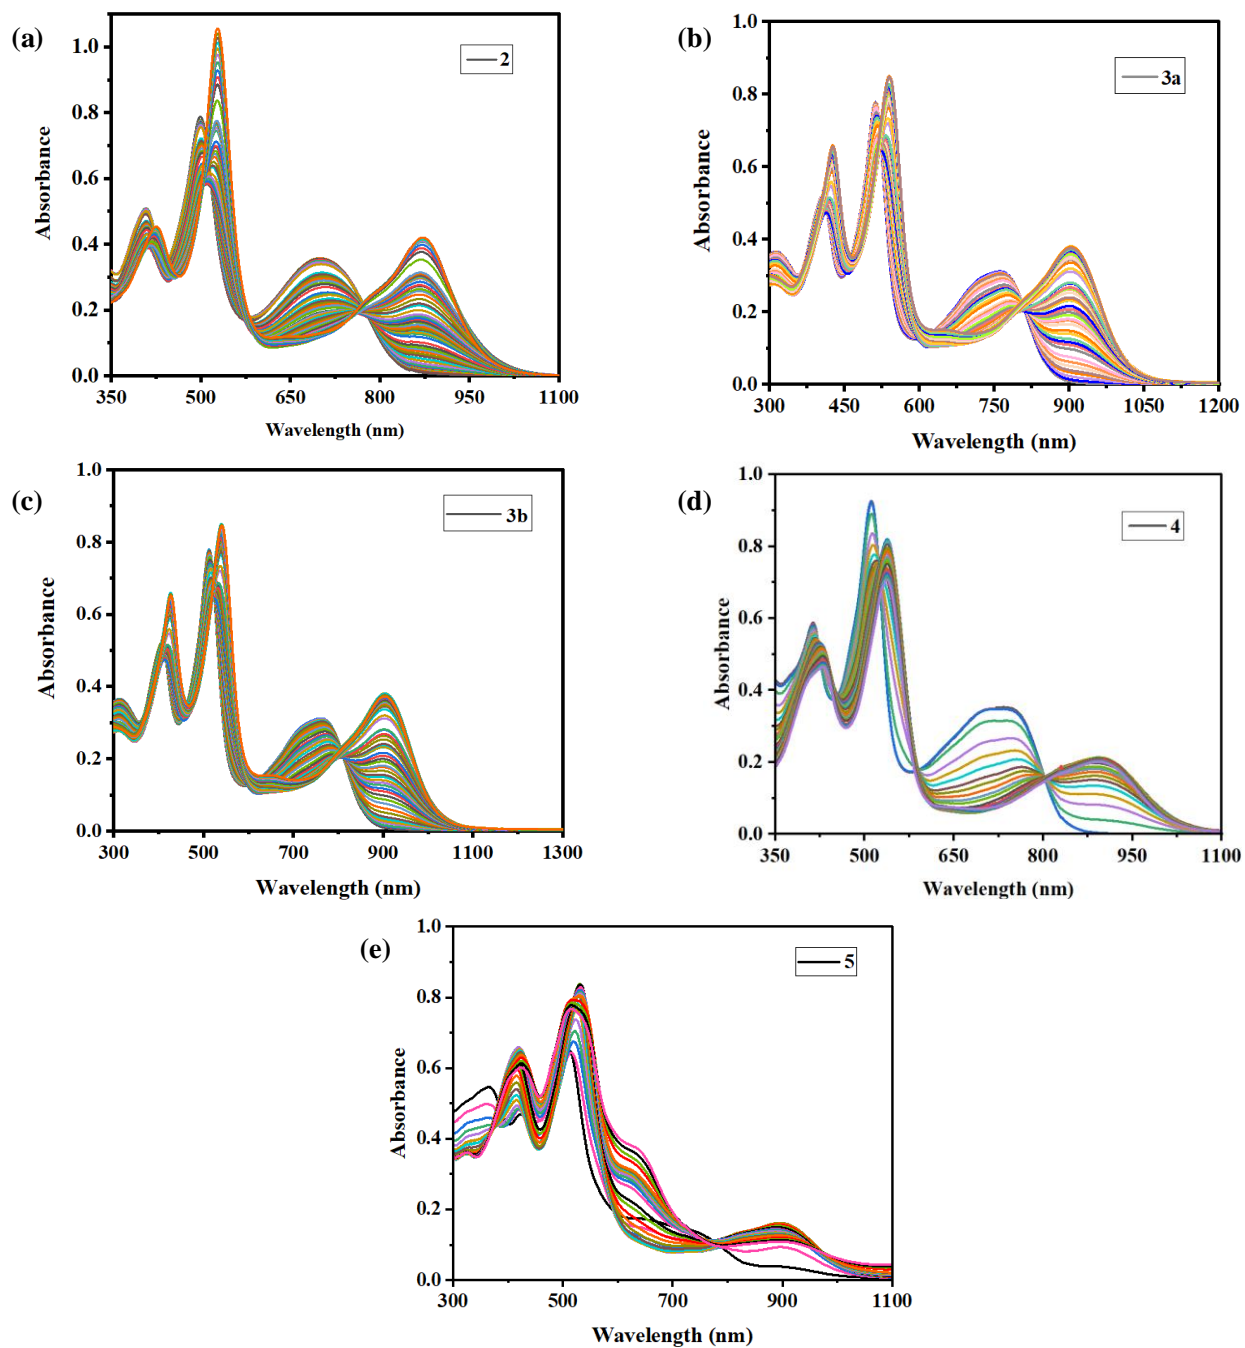

**Figure S39.** (a-d) Systematic titrations of  $\text{CHCl}_3$  solutions of compounds **2-4** ( $2 \times 10^{-5}$  M) with increasing addition of TFA (0-2 equiv.) recorded at room temperature; (e) Systematic titration of  $\text{CHCl}_3$  solution of compound **5** ( $2 \times 10^{-5}$  M) with increasing addition of  $\text{HClO}_4$  (0-2.5 equiv.) recorded at room temperature.

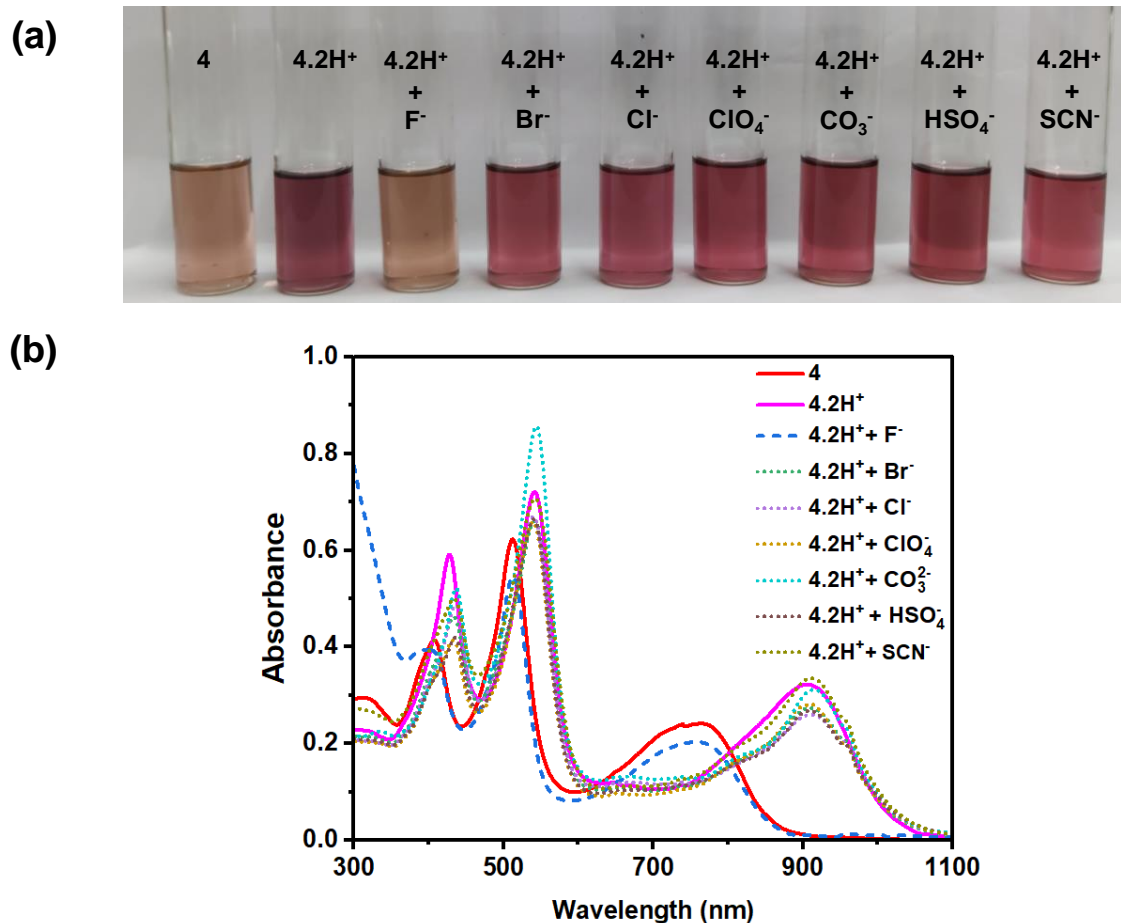

**Figure S40.** (a) Visual representation of solutions of **4** ( $2 \times 10^{-5}$  M), **4.2H<sup>+</sup>** and **4.2H<sup>+</sup>** upon addition of various anions (excess) as their tetrabutylammonium salts in CHCl<sub>3</sub>. (b) Absorption spectra of **4** ( $2 \times 10^{-5}$  M), **4.2H<sup>+</sup>** and response of **4.2H<sup>+</sup>** to various anions (excess) as their tetrabutylammonium salts in CHCl<sub>3</sub>.

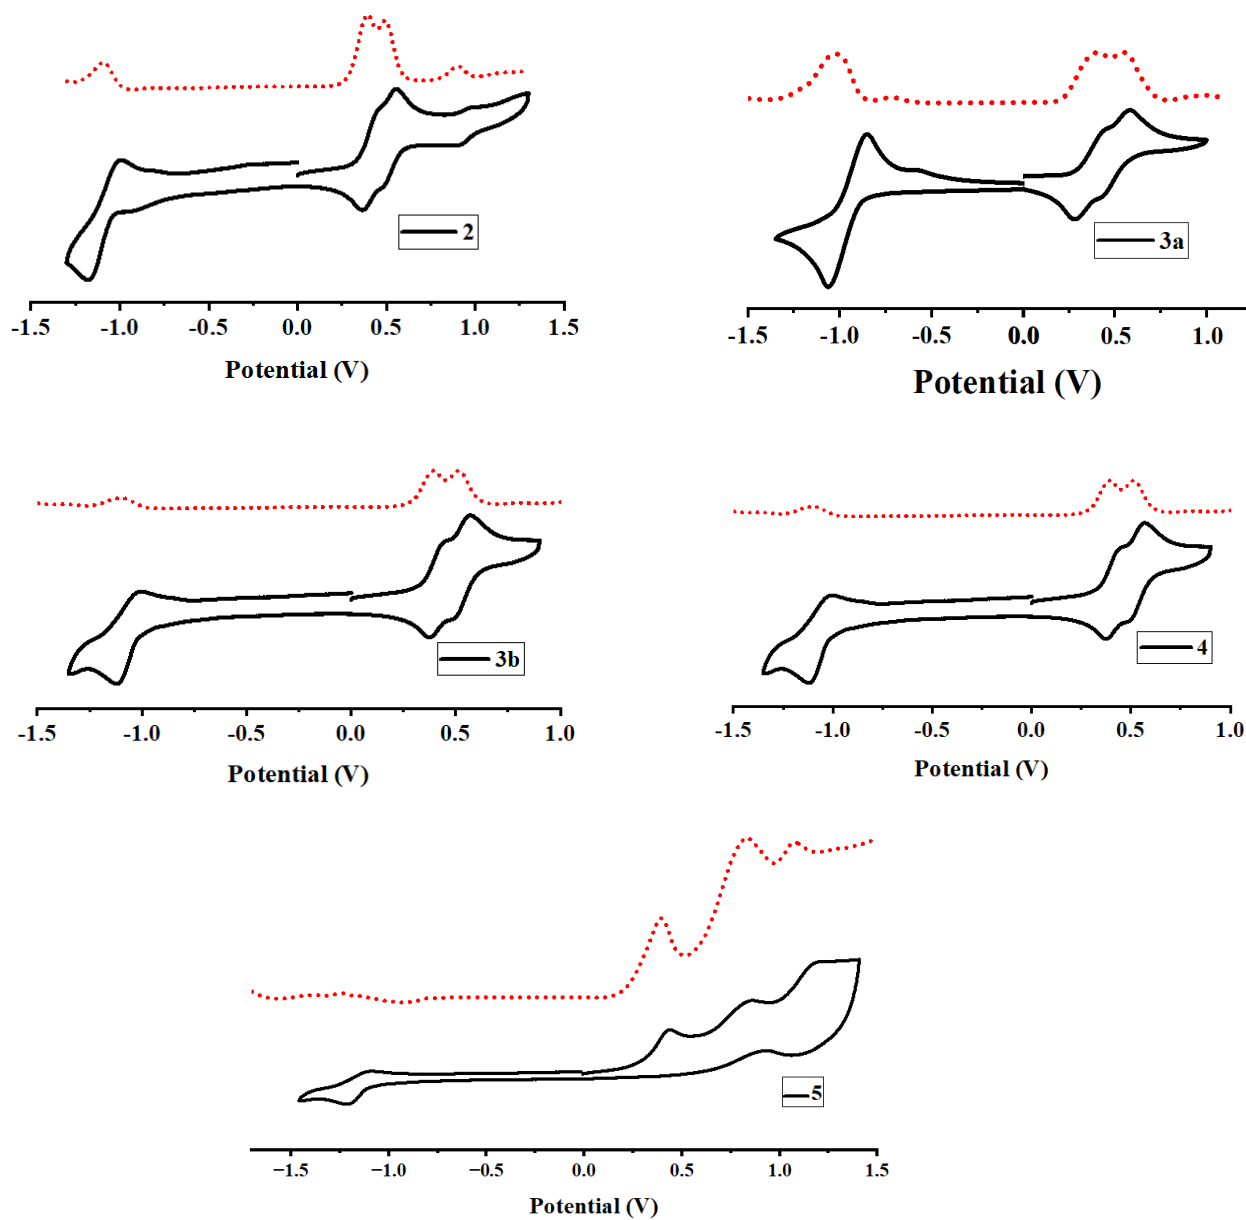

**Figure S41.** Comparison of cyclic voltammograms (black solid lines) along with differential pulse voltammograms (red dotted lines) of the compounds **2-5** recorded in  $\text{CH}_2\text{Cl}_2$  containing 0.1 M TBAP as the supporting electrolyte and a saturated calomel electrode (SCE) as the reference electrode at scan rates of  $50 \text{ mV s}^{-1}$ .

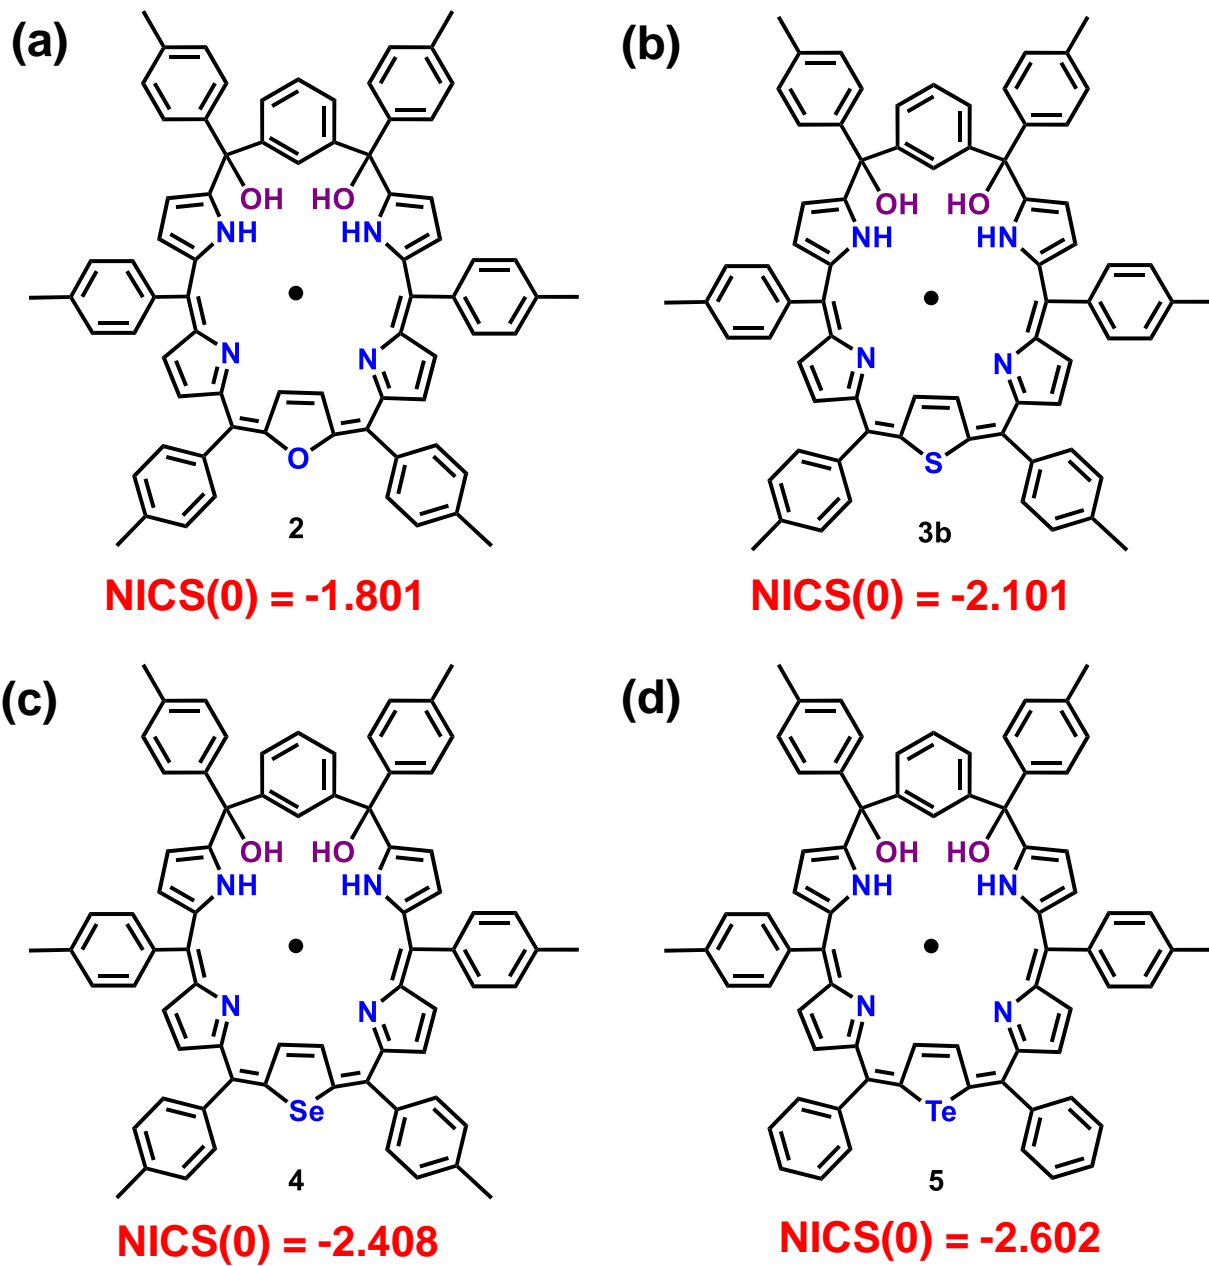

Figure S42. NICS(0) values of macrocycles 2-5.

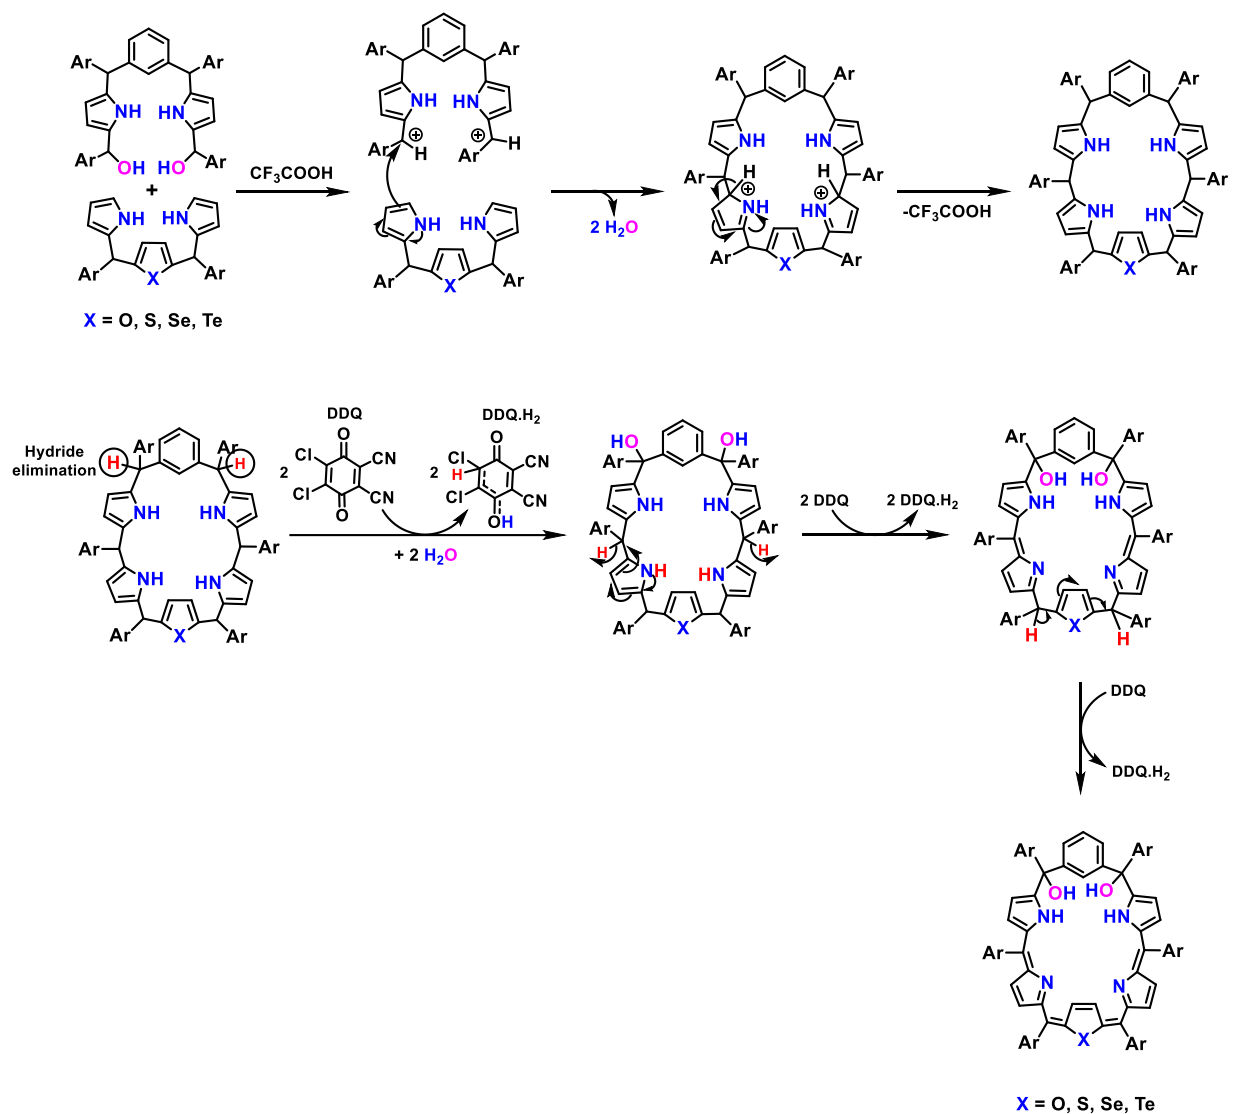

**Figure S43.** Probable mechanism for the formation of *m*-benziheterocalixhexaphyrin(1.1.1.1.1.1)s 2-5. Note: All the different aryl groups are denoted as Ar in the molecular structures for simplicity.

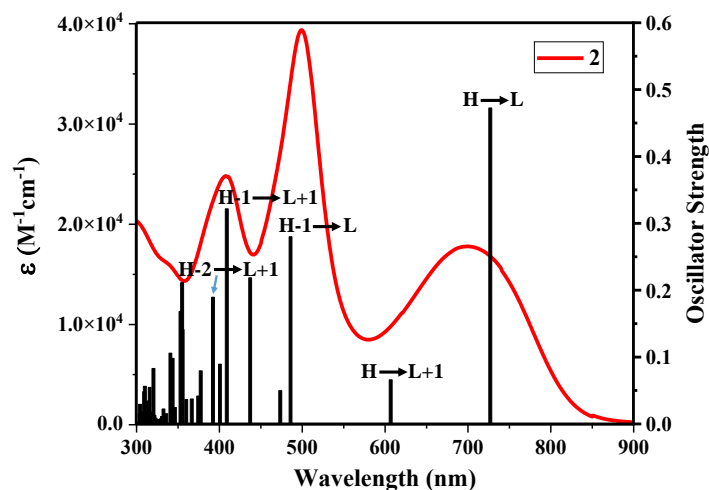

**Figure S44.** Calculated excitations (black vertical lines) and experimental absorption spectra (red line) for macrocycle **2**.

**Table S1.** Selected TD-DFT calculated oscillator strengths and compositions of the major electronic transitions of **2**.

| Wavelength (nm) | Oscillator Strength | Major contributions                                |
|-----------------|---------------------|----------------------------------------------------|
| 727.265         | 0.4725              | HOMO->LUMO (99%)                                   |
| 607.022         | 0.066               | HOMO->L+1 (91%)                                    |
| 486.232         | 0.2799              | H-1->LUMO (89%)                                    |
| 473.873         | 0.0497              | H-2->LUMO (46%), HOMO->L+2 (48%)                   |
| 437.504         | 0.2185              | H-2->LUMO (29%), H-1->L+1 (52%), HOMO->L+2 (15%)   |
| 409.297         | 0.3217              | H-2->LUMO (16%), H-1->L+1 (38%), HOMO->L+2 (31%)   |
| 401.010         | 0.0894              | H-3->LUMO (57%), H-2->L+1 (29%)                    |
| 392.628         | 0.1895              | H-3->LUMO (30%), H-2->L+1 (55%)                    |
| 377.805         | 0.0794              | H-4->LUMO (69%)                                    |
| 374.846         | 0.0417              | H-6->LUMO (72%), H-4->LUMO (10%)                   |
| 367.002         | 0.0374              | H-5->LUMO (97%)                                    |
| 360.388         | 0.0367              | H-3->L+1 (68%), H-1->L+2 (10%)                     |
| 355.918         | 0.1412              | H-9->LUMO (30%), H-7->LUMO (42%)                   |
| 355.368         | 0.2112              | H-9->LUMO (10%), H-7->LUMO (43%), H-1->L+2 (22%)   |
| 353.402         | 0.1683              | H-9->LUMO (25%), H-1->L+2 (51%)                    |
| 346.605         | 0.0246              | H-10->LUMO (23%), H-8->LUMO (49%)                  |
| 343.932         | 0.098               | H-10->LUMO (33%), H-8->LUMO (20%), H-4->L+1 (15%)  |
| 341.253         | 0.1058              | H-11->LUMO (14%), H-10->LUMO (35%), H-4->L+1 (32%) |
| 336.237         | 0.0152              | H-11->LUMO (63%), H-4->L+1 (28%)                   |

|         |        |                                                                        |
|---------|--------|------------------------------------------------------------------------|
| 334.785 | 0.0055 | HOMO->L+3 (97%)                                                        |
| 332.888 | 0.0224 | H-6->L+1 (24%), H-2->L+2 (58%)                                         |
| 331.101 | 0.0112 | H-13->LUMO (19%), H-12->LUMO (36%), H-5->L+1 (13%)                     |
| 329.684 | 0.0077 | H-13->LUMO (36%), H-12->LUMO (17%), H-5->L+1 (17%)                     |
| 327.299 | 0.006  | H-6->L+1 (28%), H-5->L+1 (11%), H-2->L+2 (23%)                         |
| 327.135 | 0.0064 | H-22->LUMO (30%), H-21->LUMO (27%), H-5->L+1 (10%)                     |
| 326.532 | 0.0015 | H-12->LUMO (18%), H-6->L+1 (21%), H-5->L+1 (39%)                       |
| 323.381 | 0.0086 | HOMO->L+4 (88%)                                                        |
| 322.079 | 0.0127 | H-21->LUMO (10%), H-14->LUMO (39%), H-13->LUMO (10%)                   |
| 320.804 | 0.083  | H-7->L+1 (60%)                                                         |
| 320.116 | 0.0116 | HOMO->L+5 (73%)                                                        |
| 319.144 | 0.0082 | H-15->LUMO (23%), H-14->LUMO (12%), HOMO->L+5 (10%)                    |
| 317.257 | 0.0178 | H-18->LUMO (10%), H-15->LUMO (19%), HOMO->L+6 (15%)                    |
| 316.214 | 0.0546 | H-15->LUMO (12%), HOMO->L+6 (37%)                                      |
| 315.473 | 0.0165 | HOMO->L+7 (51%), HOMO->L+9 (10%)                                       |
| 314.976 | 0.0344 | H-10->L+1 (14%), H-8->L+1 (21%), HOMO->L+6 (20%)                       |
| 313.995 | 0.0054 | H-8->L+1 (13%), HOMO->L+8 (40%)                                        |
| 312.925 | 0.0171 | H-19->LUMO (10%), H-17->LUMO (12%), H-8->L+1 (12%), HOMO->L+8 (29%)    |
| 312.091 | 0.0331 | H-19->LUMO (10%), H-10->L+1 (30%), HOMO->L+7 (11%)                     |
| 311.510 | 0.0064 | H-19->LUMO (25%), H-18->LUMO (12%), H-10->L+1 (15%), HOMO->L+8 (17%)   |
| 310.411 | 0.0564 | HOMO->L+9 (50%), HOMO->L+10 (17%), HOMO->L+11 (10%)                    |
| 309.581 | 0.0482 | H-9->L+1 (63%)                                                         |
| 308.066 | 0.0002 | H-17->LUMO (35%), H-16->LUMO (45%)                                     |
| 307.676 | 0.0179 | HOMO->L+7 (12%), HOMO->L+9 (25%), HOMO->L+10 (42%)                     |
| 306.793 | 0.0036 | H-20->LUMO (61%), H-20->L+1 (14%)                                      |
| 305.696 | 0.0074 | H-11->L+1 (58%), H-10->L+1 (16%)                                       |
| 304.607 | 0.0293 | H-19->LUMO (11%), H-16->LUMO (10%), HOMO->L+10 (13%), HOMO->L+11 (28%) |
| 304.256 | 0.0149 | H-19->LUMO (15%), H-18->LUMO (19%), H-16->LUMO (13%), HOMO->L+11 (10%) |
| 300.699 | 0.0025 | H-3->L+2 (13%), HOMO->L+12 (30%), HOMO->L+13 (23%)                     |
| 298.613 | 0.0081 | H-12->L+1 (79%)                                                        |

---



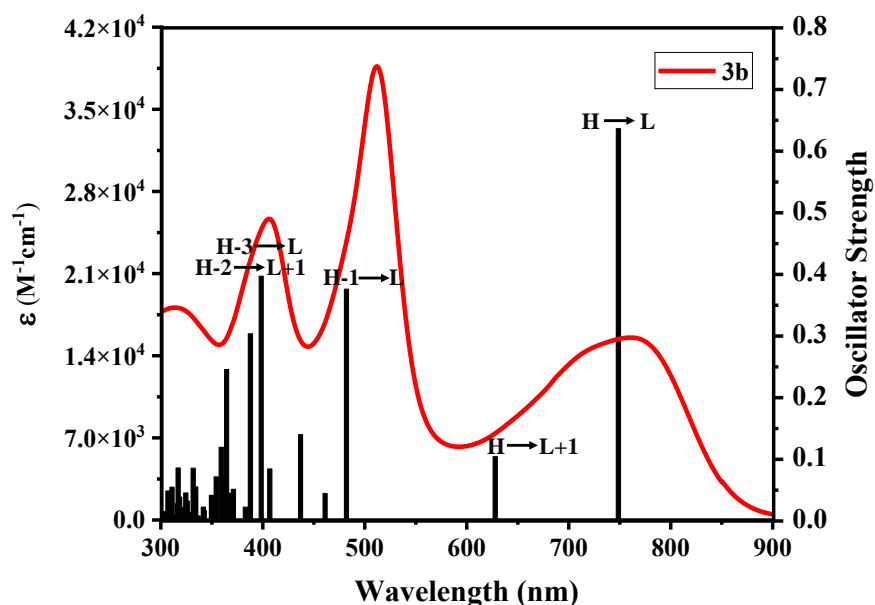

**Figure S45.** Calculated excitations (black vertical lines) and experimental absorption spectra (red line) for macrocycle **3b**.

**Table S2.** Selected TD-DFT calculated oscillator strengths and compositions of the major electronic transitions of **3b**.

| Wavelength (nm) | Oscillator Strength | Major contributions                                                |
|-----------------|---------------------|--------------------------------------------------------------------|
| 747.929         | 0.6364              | HOMO->LUMO (99%)                                                   |
| 627.196         | 0.1042              | HOMO->L+1 (92%)                                                    |
| 481.286         | 0.376               | H-1->LUMO (88%)                                                    |
| 460.377         | 0.0445              | H-2->LUMO (65%), HOMO->L+2 (29%)                                   |
| 436.288         | 0.14                | H-2->LUMO (13%), H-1->L+1 (74%)                                    |
| 406.186         | 0.0843              | H-3->LUMO (20%), H-2->L+1 (36%), HOMO->L+2 (19%)                   |
| 397.717         | 0.397               | H-3->LUMO (30%), H-1->L+1 (10%), HOMO->L+2 (30%)                   |
| 387.172         | 0.3036              | H-3->LUMO (42%), H-2->L+1 (48%)                                    |
| 382.219         | 0.0225              | H-5->LUMO (15%), H-4->LUMO (64%)                                   |
| 370.489         | 0.0513              | H-8->LUMO (16%), H-7->LUMO (21%), H-6->LUMO (18%), H-4->LUMO (11%) |
| 368.288         | 0.0449              | H-5->LUMO (62%), H-4->LUMO (14%)                                   |
| 363.803         | 0.2457              | H-8->LUMO (10%), H-7->LUMO (17%), H-6->LUMO (47%)                  |
| 359.281         | 0.0685              | H-9->LUMO (35%), H-7->LUMO (10%), H-6->LUMO (16%)                  |
| 358.553         | 0.1194              | H-9->LUMO (12%), H-8->LUMO (38%), H-7->LUMO (29%)                  |
| 353.574         | 0.0714              | H-11->LUMO (29%), H-9->LUMO (11%), H-3->L+1 (41%)                  |

|         |        |                                                                                                         |
|---------|--------|---------------------------------------------------------------------------------------------------------|
| 350.327 | 0.0207 | H-12->LUMO (13%), H-11->LUMO (22%), H-10->LUMO (27%), H-3->L+1 (15%)                                    |
| 348.986 | 0.0417 | H-11->LUMO (21%), H-10->LUMO (31%), H-3->L+1 (14%)                                                      |
| 341.884 | 0.0165 | H-4->L+1 (45%), HOMO->L+3 (11%)                                                                         |
| 341.000 | 0.0224 | HOMO->L+3 (79%)                                                                                         |
| 337.804 | 0.0001 | H-12->LUMO (63%), H-10->LUMO (16%)                                                                      |
| 335.828 | 0.0081 | H-16->LUMO (14%), H-1->L+2 (22%)                                                                        |
| 333.569 | 0.0553 | H-15->LUMO (31%)                                                                                        |
| 332.951 | 0.0361 | H-16->LUMO (11%), H-13->LUMO (19%), H-1->L+2 (24%), HOMO->L+4 (11%)                                     |
| 332.290 | 0.0033 | H-13->LUMO (19%), HOMO->L+4 (54%)                                                                       |
| 331.713 | 0.0295 | H-5->L+1 (37%), H-4->L+1 (13%), HOMO->L+4 (14%)                                                         |
| 331.013 | 0.0855 | H-13->LUMO (19%), H-5->L+1 (18%), H-1->L+2 (22%), HOMO->L+4 (12%)                                       |
| 328.748 | 0.0137 | H-16->LUMO (17%), H-14->LUMO (49%)                                                                      |
| 327.040 | 0.0046 | H-7->L+1 (14%), H-6->L+1 (61%)                                                                          |
| 325.213 | 0.0324 | H-15->LUMO (16%), H-7->L+1 (25%)                                                                        |
| 323.803 | 0.0454 | H-9->L+1 (19%), H-7->L+1 (27%), H-6->L+1 (13%)                                                          |
| 323.094 | 0.007  | H-22->LUMO (27%), H-9->L+1 (22%)                                                                        |
| 320.588 | 0.0161 | H-23->LUMO (23%), H-19->LUMO (15%), H-18->LUMO (11%), H-16->LUMO (12%)                                  |
| 319.341 | 0.022  | H-11->L+1 (11%), H-9->L+1 (12%), H-8->L+1 (32%)                                                         |
| 318.742 | 0.0192 | H-18->LUMO (20%), HOMO->L+7 (11%), HOMO->L+11 (13%)                                                     |
| 317.851 | 0.0388 | HOMO->L+7 (15%), HOMO->L+11 (11%)                                                                       |
| 317.436 | 0.0025 | H-20->LUMO (26%), HOMO->L+6 (33%)                                                                       |
| 316.642 | 0.0006 | H-19->LUMO (12%), HOMO->L+8 (35%)                                                                       |
| 316.335 | 0.086  | HOMO->L+5 (16%), HOMO->L+7 (11%), HOMO->L+11 (22%), HOMO->L+12 (10%)                                    |
| 315.940 | 0.009  | H-10->L+1 (19%), HOMO->L+5 (48%)                                                                        |
| 315.465 | 0.0279 | H-10->L+1 (31%), HOMO->L+5 (11%)                                                                        |
| 313.717 | 0.0059 | H-18->LUMO (11%), H-17->LUMO (22%), HOMO->L+7 (21%), HOMO->L+8 (16%)                                    |
| 313.384 | 0.0097 | H-20->LUMO (11%), H-19->LUMO (13%), H-17->LUMO (10%), H-11->L+1 (12%), HOMO->L+6 (19%), HOMO->L+7 (12%) |
| 312.807 | 0.0035 | H-20->LUMO (17%), H-17->LUMO (28%), HOMO->L+6 (18%)                                                     |
| 312.366 | 0.0068 | H-11->L+1 (38%), H-8->L+1 (11%), H-2->L+2 (12%)                                                         |
| 310.302 | 0.0547 | H-2->L+2 (17%), HOMO->L+8 (23%), HOMO->L+13 (16%)                                                       |

|         |        |                                                                       |
|---------|--------|-----------------------------------------------------------------------|
| 308.495 | 0.0192 | H-2->L+2 (35%), HOMO->L+10 (26%), HOMO->L+11 (12%)                    |
| 307.104 | 0.0258 | H-12->L+1 (59%)                                                       |
| 306.315 | 0.0486 | H-12->L+1 (13%), H-2->L+2 (20%), HOMO->L+9 (27%),<br>HOMO->L+10 (14%) |
| 304.607 | 0.0022 | H-21->LUMO (81%)                                                      |

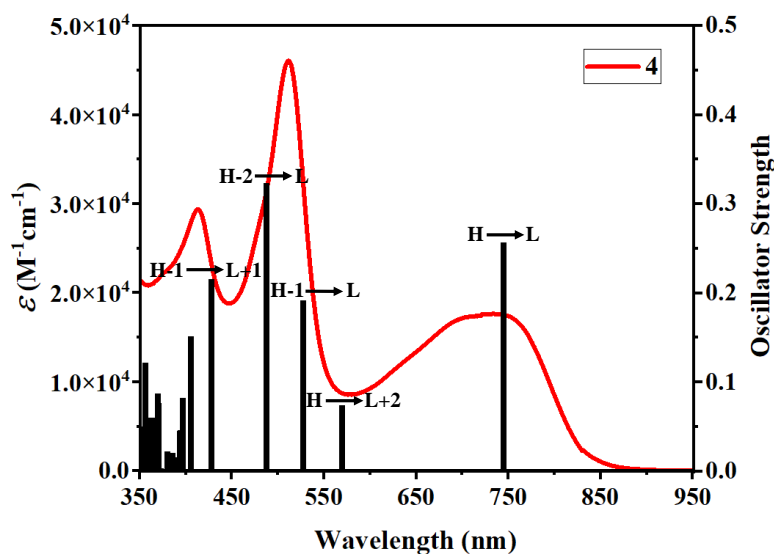

**Figure S46.** Calculated excitations (black vertical lines) and experimental absorption spectra (red line) for macrocycle **4**.

**Table S3.** Selected TD-DFT calculated oscillator strengths and compositions of the major electronic transitions of **4**.

| Wavelength (nm) | Oscillator Strength | Major contributions                                                |
|-----------------|---------------------|--------------------------------------------------------------------|
| 1026.359        | 0.3500              | HOMO->LUMO (95%)                                                   |
| 743.578         | 0.2568              | HOMO->L+1 (89%)                                                    |
| 568.396         | 0.0738              | H-2->LUMO (20%), HOMO->L+2 (77%)                                   |
| 526.293         | 0.1916              | H-1->LUMO (85%)                                                    |
| 486.441         | 0.3231              | H-2->LUMO (74%), HOMO->L+2 (16%)                                   |
| 426.943         | 0.2151              | H-1->L+1 (90%)                                                     |
| 404.516         | 0.1515              | H-2->L+1 (86%)                                                     |
| 395.446         | 0.0821              | H-3->LUMO (87%)                                                    |
| 393.002         | 0.0456              | H-7->LUMO (10%), H-6->LUMO (23%), H-5->LUMO (45%), H-4->LUMO (11%) |
| 386.015         | 0.0156              | H-6->LUMO (15%), HOMO->L+3 (72%)                                   |

|         |        |                                                                                      |
|---------|--------|--------------------------------------------------------------------------------------|
| 384.602 | 0.02   | H-6->LUMO (39%), H-4->LUMO (17%), HOMO->L+3 (25%)                                    |
| 378.797 | 0.0223 | H-5->LUMO (30%), H-4->LUMO (57%)                                                     |
| 372.113 | 0.0027 | HOMO->L+4 (90%)                                                                      |
| 369.661 | 0.0759 | H-7->LUMO (51%), H-1->L+2 (19%)                                                      |
| 368.990 | 0.0018 | HOMO->L+5 (81%), HOMO->L+6 (12%)                                                     |
| 368.474 | 0.0872 | H-8->LUMO (13%), H-7->LUMO (26%), H-1->L+2 (41%)                                     |
| 366.156 | 0.0582 | H-8->LUMO (44%), H-1->L+2 (28%)                                                      |
| 364.188 | 0.0538 | H-8->LUMO (18%), HOMO->L+6 (32%), HOMO->L+10 (18%)                                   |
| 361.807 | 0.0601 | HOMO->L+6 (21%), HOMO->L+10 (40%)                                                    |
| 358.315 | 0.0061 | H-10->LUMO (43%), H-9->LUMO (33%)                                                    |
| 356.000 | 0.0198 | HOMO->L+7 (83%), HOMO->L+8 (11%)                                                     |
| 355.276 | 0.1217 | H-10->LUMO (22%), H-9->LUMO (38%), HOMO->L+6 (10%)                                   |
| 352.930 | 0.004  | H-12->LUMO (19%), H-2->L+2 (11%), HOMO->L+7 (10%), HOMO->L+8 (42%)                   |
| 352.158 | 0.0038 | HOMO->L+9 (70%)                                                                      |
| 352.058 | 0.0288 | H-11->LUMO (14%), H-2->L+2 (29%), HOMO->L+9 (24%)                                    |
| 351.280 | 0.0407 | H-12->LUMO (14%), H-11->LUMO (20%), H-2->L+2 (22%), HOMO->L+8 (19%)                  |
| 350.287 | 0.0504 | H-12->LUMO (28%), H-11->LUMO (13%), H-10->LUMO (11%)                                 |
| 344.362 | 0.047  | HOMO->L+11 (25%), HOMO->L+12 (11%), HOMO->L+13 (22%), HOMO->L+14 (16%)               |
| 343.000 | 0.0245 | H-13->LUMO (12%), H-11->LUMO (25%), HOMO->L+14 (26%)                                 |
| 341.799 | 0.0657 | H-5->L+1 (14%), H-3->L+1 (11%), HOMO->L+10 (11%), HOMO->L+11 (29%), HOMO->L+14 (14%) |
| 340.953 | 0.0092 | H-13->LUMO (10%), HOMO->L+12 (36%)                                                   |
| 339.394 | 0.0112 | H-13->LUMO (33%), HOMO->L+11 (10%), HOMO->L+14 (10%)                                 |
| 337.280 | 0.0109 | H-14->LUMO (70%)                                                                     |
| 334.803 | 0.065  | H-19->LUMO (40%), HOMO->L+16 (12%)                                                   |
| 334.207 | 0.0402 | H-5->L+1 (12%), H-3->L+1 (48%)                                                       |
| 332.192 | 0.0021 | HOMO->L+12 (20%), HOMO->L+13 (53%)                                                   |
| 330.572 | 0.0147 | H-15->LUMO (66%)                                                                     |
| 329.587 | 0.0017 | H-6->L+1 (23%), HOMO->L+16 (34%)                                                     |
| 328.470 | 0.007  | HOMO->L+14 (16%), HOMO->L+15 (63%)                                                   |
| 325.743 | 0.0565 | H-22->LUMO (26%), H-16->LUMO (25%)                                                   |

|         |        |                                                                      |
|---------|--------|----------------------------------------------------------------------|
| 324.770 | 0.1184 | H-16->LUMO (14%), H-4->L+1 (35%), HOMO->L+16 (12%)                   |
| 322.850 | 0.0709 | H-23->LUMO (12%), H-22->LUMO (15%), H-16->LUMO (28%), H-6->L+1 (18%) |
| 321.069 | 0.0766 | H-6->L+1 (14%), H-5->L+1 (26%), H-4->L+1 (28%)                       |
| 320.621 | 0.0026 | H-18->LUMO (59%), H-17->LUMO (22%)                                   |
| 317.063 | 0.0081 | H-18->LUMO (22%), H-17->LUMO (45%), H-15->LUMO (11%)                 |
| 316.302 | 0.0654 | H-7->L+1 (42%)                                                       |
| 314.633 | 0.0364 | H-21->LUMO (66%), H-7->L+1 (12%)                                     |
| 313.250 | 0.0056 | H-20->LUMO (45%), H-8->L+1 (19%), H-7->L+1 (11%)                     |
| 312.649 | 0.0051 | H-20->LUMO (31%), H-8->L+1 (24%)                                     |
| 310.147 | 0.0198 | H-23->LUMO (29%), H-8->L+1 (26%)                                     |

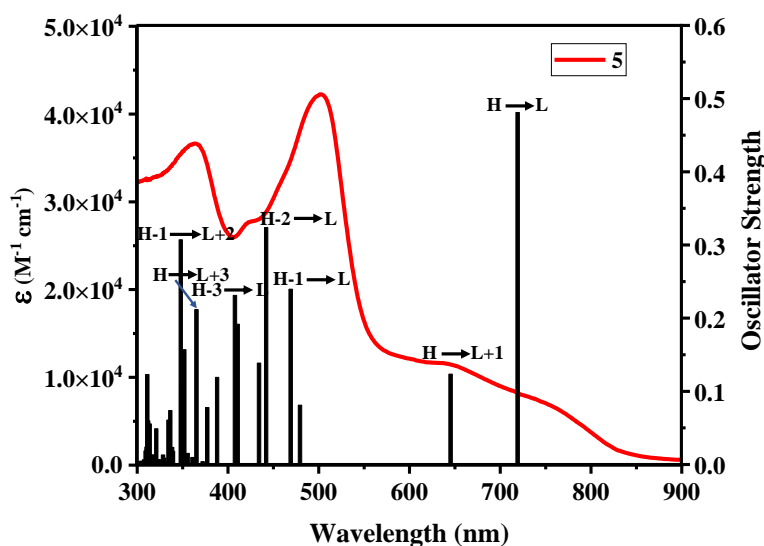

**Figure S47.** Calculated excitations (black vertical lines) and experimental absorption spectra (red line) for macrocycle **5**.

**Table S4.** Selected TD-DFT calculated oscillator strengths and compositions of the major electronic transitions of **5**.

| Wavelength (nm) | Oscillator Strength | Major contributions                              |
|-----------------|---------------------|--------------------------------------------------|
| 719.75          | 0.481               | HOMO->LUMO (95%)                                 |
| 645.886         | 0.1236              | HOMO->L+1 (92%)                                  |
| 480.057         | 0.0811              | H-1->LUMO (44%), H-1->L+1 (10%), HOMO->L+2 (40%) |

|         |        |                                                                                       |
|---------|--------|---------------------------------------------------------------------------------------|
| 469.779 | 0.2396 | H-2->LUMO (27%), H-1->LUMO (40%), HOMO->L+2 (31%)                                     |
| 442.785 | 0.3238 | H-3->LUMO (12%), H-2->LUMO (54%), H-1->LUMO (11%)                                     |
| 434.864 | 0.1387 | H-1->L+1 (77%)                                                                        |
| 411.443 | 0.1918 | H-3->LUMO (16%), H-2->L+1 (74%)                                                       |
| 408.38  | 0.2311 | H-3->LUMO (53%), H-2->L+1 (15%)                                                       |
| 388.775 | 0.1192 | H-4->LUMO (16%), H-3->L+1 (67%)                                                       |
| 377.874 | 0.0779 | H-6->LUMO (27%), H-4->LUMO (42%), H-3->L+1 (14%)                                      |
| 372.896 | 0.0039 | H-6->LUMO (41%), H-4->LUMO (23%), HOMO->L+3 (17%)                                     |
| 366.037 | 0.2118 | HOMO->L+3 (65%)                                                                       |
| 361.607 | 0.0097 | H-7->LUMO (44%), H-7->L+1 (11%), H-4->L+1 (18%), H-1->L+2 (10%)                       |
| 356.358 | 0.0153 | H-5->LUMO (90%)                                                                       |
| 352.608 | 0.1569 | H-7->LUMO (19%), H-1->L+2 (58%)                                                       |
| 351.121 | 0.0757 | H-4->L+1 (51%), H-1->L+2 (19%)                                                        |
| 349.497 | 0.1079 | H-10->LUMO (54%), H-9->LUMO (17%), H-8->LUMO (10%)                                    |
| 348.701 | 0.3072 | H-8->LUMO (50%), H-8->L+1 (20%), H-4->L+1 (12%)                                       |
| 340.186 | 0.0182 | H-12->LUMO (12%), H-10->LUMO (12%), H-9->LUMO (54%)                                   |
| 339.19  | 0.0234 | H-11->LUMO (35%), H-7->LUMO (13%), H-7->L+1 (19%)                                     |
| 337.216 | 0.0738 | H-11->LUMO (21%), H-2->L+2 (45%)                                                      |
| 335.246 | 0.0608 | H-11->LUMO (28%), H-7->L+1 (22%), H-2->L+2 (22%)                                      |
| 333.425 | 0.0002 | H-5->L+1 (77%)                                                                        |
| 331.269 | 0.0041 | HOMO->L+4 (57%)                                                                       |
| 330.563 | 0.0087 | H-23->LUMO (14%), H-16->LUMO (11%), H-7->L+1 (10%), HOMO->L+4 (26%)                   |
| 329.246 | 0.0131 | H-6->L+1 (49%)                                                                        |
| 329.071 | 0.0072 | H-12->LUMO (26%), H-6->L+1 (18%)                                                      |
| 326.687 | 0.0015 | H-22->LUMO (12%), H-22->L+1 (10%), H-12->LUMO (20%)                                   |
| 324.422 | 0.0068 | HOMO->L+6 (40%), HOMO->L+9 (20%)                                                      |
| 323.55  | 0.0036 | H-22->LUMO (10%), H-22->L+1 (14%), H-13->LUMO (11%), H-12->LUMO (17%), H-8->L+1 (14%) |
| 321.753 | 0.0489 | H-18->LUMO (10%), H-13->LUMO (28%), H-8->LUMO (10%), H-8->L+1 (19%)                   |
| 321.552 | 0.0015 | HOMO->L+5 (80%)                                                                       |
| 321.219 | 0.0099 | H-14->LUMO (47%), H-9->L+1 (11%)                                                      |
| 319.654 | 0.0079 | H-14->LUMO (19%), H-11->L+1 (20%), H-9->L+1 (19%)                                     |
| 318.128 | 0.0133 | H-11->L+1 (45%)                                                                       |
| 317.257 | 0.0094 | H-15->LUMO (22%), H-11->L+1 (14%), H-9->L+1 (14%)                                     |

|         |        |                                                                       |
|---------|--------|-----------------------------------------------------------------------|
| 316.682 | 0.0014 | H-18->LUMO (18%), H-16->LUMO (31%)                                    |
| 314.489 | 0.0555 | HOMO->L+7 (64%), HOMO->L+8 (14%)                                      |
| 313.701 | 0.003  | H-18->LUMO (18%), HOMO->L+7 (12%)                                     |
| 312.823 | 0.0597 | H-3->L+2 (24%), HOMO->L+6 (17%), HOMO->L+8 (13%)                      |
| 312.673 | 0.0112 | H-21->LUMO (11%), HOMO->L+9 (18%), HOMO->L+10 (35%)                   |
| 311.8   | 0.123  | H-16->LUMO (11%), H-3->L+2 (30%), HOMO->L+8 (12%)                     |
| 311.041 | 0.0239 | H-20->LUMO (18%), H-20->L+1 (12%), HOMO->L+6 (12%), HOMO->L+9 (12%)   |
| 310.675 | 0.0182 | H-21->LUMO (12%), H-18->LUMO (10%), H-12->L+1 (16%), HOMO->L+10 (18%) |
| 310.131 | 0.0187 | H-12->L+1 (10%), H-10->L+1 (56%), H-9->L+1 (14%)                      |
| 309.226 | 0.0029 | H-20->LUMO (10%), HOMO->L+8 (39%), HOMO->L+9 (12%)                    |
| 308.288 | 0.0065 | H-21->LUMO (36%), H-12->L+1 (28%)                                     |
| 307.439 | 0.001  | H-17->LUMO (65%), H-15->LUMO (12%)                                    |
| 305.523 | 0.0036 | HOMO->L+9 (10%), HOMO->L+11 (56%), HOMO->L+15 (18%)                   |
| 304.338 | 0.0045 | HOMO->L+12 (79%)                                                      |

**Table S5.** S<sub>0</sub> optimized geometry of the compound **2** at B3LYP/6-31G (d,p) level of theory and Empirical Dispersion GD2.

# Charge = 0

# Sum of imaginary frequencies= 0

# Total Energy (hartree) = -3300.746290

| Atom | X        | Y       | Z        | Atom | X        | Y       | Z        |
|------|----------|---------|----------|------|----------|---------|----------|
| C    | 1.65374  | 1.44485 | -2.02306 | C    | 2.45239  | 6.58242 | 0.96435  |
| C    | 1.28173  | 1.99566 | -0.79770 | C    | 2.08491  | 5.71967 | 2.00075  |
| C    | -0.05669 | 2.35356 | -0.57404 | C    | 2.04144  | 4.33522 | 1.80948  |
| C    | -1.01892 | 2.15512 | -1.56149 | C    | -4.18254 | 4.10804 | -2.47312 |
| C    | -0.63783 | 1.59671 | -2.79006 | C    | -4.53107 | 5.27968 | -3.14565 |
| C    | 0.68853  | 1.24637 | -3.01761 | C    | -3.55259 | 6.18923 | -3.56428 |
| C    | 2.29397  | 2.27141 | 0.32684  | C    | -2.21379 | 5.89396 | -3.27483 |
| C    | -2.47774 | 2.58532 | -1.35041 | C    | -1.86073 | 4.72477 | -2.60315 |
| O    | -2.59614 | 2.93049 | 0.04102  | C    | 2.51490  | 8.07618 | 1.17241  |
| C    | -3.37542 | 1.39415 | -1.62905 | C    | -3.92564 | 7.43837 | -4.32486 |
| O    | 1.76777  | 1.57489 | 1.47157  | H    | 2.68673  | 1.16944 | -2.20633 |
| C    | 3.65668  | 1.68721 | 0.02298  | H    | -0.34289 | 2.79003 | 0.37389  |

|   |          |          |          |   |          |          |          |
|---|----------|----------|----------|---|----------|----------|----------|
| C | 2.36638  | 3.78136  | 0.57079  | H | -1.38853 | 1.43721  | -3.55783 |
| C | -2.84066 | 3.80807  | -2.20110 | H | 0.97860  | 0.81320  | -3.97036 |
| C | 4.83709  | 2.21021  | -0.51390 | H | -3.49566 | 3.25682  | 0.18004  |
| C | 5.72328  | 1.13329  | -0.70030 | H | 2.42938  | 1.61960  | 2.17654  |
| C | 5.07709  | -0.03675 | -0.25533 | H | 5.01439  | 3.25004  | -0.74364 |
| N | 3.82749  | 0.35294  | 0.17824  | H | 6.71975  | 1.17599  | -1.11433 |
| N | -3.51069 | 0.45624  | -0.66916 | H | 3.16171  | -0.35381 | 0.51583  |
| C | -4.26041 | -0.60842 | -1.12319 | H | -3.17782 | 0.47358  | 0.30348  |
| C | -4.61495 | -0.30676 | -2.45235 | H | -5.22038 | -0.93185 | -3.09255 |
| C | -4.05682 | 0.94527  | -2.76799 | H | -4.13296 | 1.48170  | -3.70264 |
| C | 1.04123  | -2.37483 | 2.29273  | H | 2.82696  | -1.22563 | 2.96829  |
| C | 1.75281  | -1.32483 | 2.97638  | H | 1.00830  | 0.37464  | 4.15619  |
| C | 0.83280  | -0.51641 | 3.57128  | H | 5.69691  | -4.39083 | -0.30800 |
| C | -0.47249 | -1.02339 | 3.24695  | H | 3.40581  | -5.49704 | 0.54784  |
| O | -0.29297 | -2.22589 | 2.58426  | H | -2.68928 | -3.32469 | 3.62335  |
| C | -1.73023 | -0.49041 | 3.29665  | H | -4.32245 | -4.01100 | 1.59533  |
| C | 1.44338  | -3.38670 | 1.45559  | H | -3.84563 | 0.55703  | 4.59916  |
| C | 2.79148  | -3.34455 | 0.90943  | H | -4.31435 | 2.94398  | 5.05719  |
| C | 0.45568  | -4.37389 | 0.93725  | H | -0.68532 | 4.03922  | 3.03908  |
| C | -2.80022 | -1.27978 | 2.67339  | H | -0.22671 | 1.67131  | 2.56991  |
| C | -1.96870 | 0.92945  | 3.60999  | H | 1.54844  | -6.14004 | 1.52238  |
| N | 3.38862  | -2.17595 | 0.68938  | H | -0.10304 | -7.72531 | 0.60494  |
| C | 4.63370  | -2.44320 | 0.14032  | H | -2.56883 | -4.44110 | -0.64468 |
| C | 4.81272  | -3.88243 | 0.04985  | H | -0.91381 | -2.85585 | 0.25457  |
| C | 3.64689  | -4.44523 | 0.48951  | H | -2.67635 | -7.98303 | 0.04160  |
| C | -3.10315 | -2.68578 | 2.85551  | H | -3.41327 | -6.65805 | -0.88921 |
| C | -3.93467 | -3.03069 | 1.83026  | H | -2.10755 | -7.62806 | -1.59133 |
| C | -4.10924 | -1.83018 | 1.02735  | H | -3.87373 | 5.31587  | 4.45825  |
| N | -3.44798 | -0.76792 | 1.63717  | H | -2.35866 | 5.42589  | 5.36140  |
| C | -3.14009 | 1.31946  | 4.28218  | H | -2.36821 | 5.76616  | 3.62646  |
| C | -3.40348 | 2.66335  | 4.53357  | H | 7.87119  | -0.36558 | 0.40066  |
| C | -2.51762 | 3.66670  | 4.11332  | H | 10.09190 | -0.88705 | -0.55656 |
| C | -1.36391 | 3.27879  | 3.41937  | H | 8.27034  | -3.67626 | -3.26208 |
| C | -1.09072 | 1.93636  | 3.16741  | H | 6.04863  | -3.14989 | -2.30766 |
| C | 0.66161  | -5.76033 | 1.02446  | H | -6.53098 | -3.32435 | 0.62064  |
| C | -0.27912 | -6.65577 | 0.51415  | H | -7.37000 | -5.44081 | -0.35698 |
| C | -1.45514 | -6.20120 | -0.09967 | H | -4.61817 | -5.01794 | -3.62403 |
| C | -1.66074 | -4.81918 | -0.18321 | H | -3.78535 | -2.90249 | -2.64809 |
| C | -0.72415 | -3.92062 | 0.32172  | H | 11.37782 | -1.80636 | -2.49339 |
| C | -2.47058 | -7.16799 | -0.66244 | H | 11.17389 | -3.47934 | -1.96123 |
| C | -2.79724 | 5.12151  | 4.40117  | H | 10.63012 | -3.00305 | -3.57462 |



|   |          |          |          |   |          |          |          |
|---|----------|----------|----------|---|----------|----------|----------|
| C | 5.47380  | -1.41924 | -0.29451 | H | -7.51151 | -6.96746 | -2.25789 |
| C | -4.52036 | -1.75890 | -0.30367 | H | -6.53606 | -6.68426 | -3.71732 |
| C | -5.09517 | -2.96451 | -0.93983 | H | -5.83233 | -7.52078 | -2.32958 |
| C | 6.80057  | -1.73329 | -0.87280 | H | 2.93117  | 4.22419  | -1.45851 |
| C | 7.95867  | -1.09110 | -0.40142 | H | 3.03691  | 6.67063  | -1.10918 |
| C | 9.20771  | -1.38927 | -0.94105 | H | 1.82160  | 6.13478  | 2.97049  |
| C | 9.34596  | -2.32920 | -1.97184 | H | 1.72628  | 3.69009  | 2.62223  |
| C | 8.18913  | -2.95821 | -2.44999 | H | -4.95920 | 3.41623  | -2.16264 |
| C | 6.93667  | -2.66937 | -1.91137 | H | -5.57808 | 5.49123  | -3.34859 |
| C | -6.11258 | -3.69846 | -0.30798 | H | -1.43777 | 6.59244  | -3.57838 |
| C | -6.57958 | -4.88948 | -0.85966 | H | -0.81776 | 4.52420  | -2.38319 |
| C | -6.04598 | -5.39178 | -2.05458 | H | 2.02992  | 8.61112  | 0.34777  |
| C | -5.04489 | -4.64803 | -2.69524 | H | 2.02381  | 8.36617  | 2.10671  |
| C | -4.57857 | -3.45253 | -2.15382 | H | 3.55475  | 8.42531  | 1.21798  |
| C | 10.70423 | -2.66888 | -2.53452 | H | -4.93192 | 7.77886  | -4.05888 |
| C | -6.51218 | -6.70955 | -2.62253 | H | -3.21910 | 8.25053  | -4.12312 |
| C | 2.71816  | 4.64165  | -0.47917 | H | -3.91562 | 7.25670  | -5.40788 |
| C | 2.76605  | 6.01858  | -0.28225 |   |          |          |          |

**Table S6.** S<sub>0</sub> optimized geometry of the compound **3b** at B3LYP/6-31G (d,p) level of theory and Empirical Dispersion GD2.

# Charge = 0

# Sum of imaginary frequencies= 0

# Total Energy (hartree) = -3623.724133

| Atom | X        | Y        | Z        | Atom | X        | Y        | Z        |
|------|----------|----------|----------|------|----------|----------|----------|
| C    | -1.10371 | -1.03076 | -1.51122 | C    | -1.28419 | -5.75369 | 2.27556  |
| C    | -0.84073 | -1.91404 | -0.46119 | C    | -1.49730 | -4.38713 | 2.06475  |
| C    | 0.47056  | -2.36964 | -0.26595 | C    | 4.37880  | -4.45893 | -1.67960 |
| C    | 1.51128  | -1.95991 | -1.10028 | C    | 4.59387  | -5.67570 | -2.32134 |
| C    | 1.23401  | -1.08178 | -2.15403 | C    | 3.55846  | -6.31388 | -3.01933 |
| C    | -0.06543 | -0.61839 | -2.35174 | C    | 2.30483  | -5.69432 | -3.04358 |
| C    | -1.92903 | -2.40107 | 0.51567  | C    | 2.08496  | -4.47441 | -2.39962 |
| C    | 2.91633  | -2.54512 | -0.90835 | C    | -1.07957 | -8.13702 | 1.43731  |
| O    | 3.01745  | -2.83853 | 0.50122  | C    | 3.80100  | -7.61732 | -3.74077 |
| C    | 3.96988  | -1.50838 | -1.24787 | H    | -2.10897 | -0.66224 | -1.67958 |
| O    | -1.71815 | -1.62033 | 1.70864  | H    | 0.68605  | -3.06067 | 0.53776  |
| C    | -3.34085 | -2.13013 | 0.03745  | H    | 2.03684  | -0.76317 | -2.81201 |

|   |          |          |          |   |           |          |          |
|---|----------|----------|----------|---|-----------|----------|----------|
| C | -1.73785 | -3.89836 | 0.78149  | H | -0.27558  | 0.06830  | -3.16629 |
| C | 3.12029  | -3.83716 | -1.70990 | H | 3.87485   | -3.26113 | 0.64720  |
| C | -4.32957 | -2.95496 | -0.50550 | H | -2.44252  | -1.82127 | 2.31938  |
| C | -5.44988 | -2.14980 | -0.77119 | H | -4.23323  | -4.01658 | -0.67383 |
| C | -5.13947 | -0.83680 | -0.37247 | H | -6.38746  | -2.46097 | -1.20697 |
| N | -3.84950 | -0.87170 | 0.11918  | H | -3.38729  | -0.00308 | 0.40605  |
| N | 4.03650  | -0.39470 | -0.49006 | H | 3.52564   | -0.16248 | 0.37323  |
| C | 5.01787  | 0.45882  | -0.94940 | H | 6.41865   | 0.21824  | -2.65188 |
| C | 5.60255  | -0.17626 | -2.06509 | H | 5.12207   | -2.13473 | -3.02541 |
| C | 4.93706  | -1.39984 | -2.25607 | H | -2.89782  | 1.31319  | 2.37935  |
| C | -1.66669 | 2.92273  | 1.53000  | H | -0.81361  | 0.33747  | 3.53824  |
| C | -1.90302 | 1.72775  | 2.30101  | H | -7.03636  | 3.10428  | -0.55952 |
| C | -0.80436 | 1.21964  | 2.91322  | H | -5.16084  | 4.92481  | 0.09178  |
| C | 0.43044  | 1.89862  | 2.60185  | H | 2.76854   | 4.28041  | 2.63311  |
| C | 1.69842  | 1.41091  | 2.78570  | H | 4.83235   | 4.40008  | 0.90056  |
| C | -2.58847 | 3.65683  | 0.81950  | H | 3.54239   | 0.70837  | 4.62439  |
| C | -3.87077 | 3.09742  | 0.43587  | H | 4.00511   | -1.54418 | 5.53686  |
| C | -2.26189 | 5.02717  | 0.32690  | H | 0.93601   | -3.18601 | 3.01980  |
| C | 2.86177  | 2.06373  | 2.18126  | H | 0.47157   | -0.95056 | 2.12347  |
| C | 1.93748  | 0.05493  | 3.34192  | H | -3.59670  | 6.02212  | 1.69268  |
| N | -4.07063 | 1.78533  | 0.29413  | H | -3.06675  | 8.29737  | 0.87272  |
| C | -5.37284 | 1.62481  | -0.15501 | H | -0.29615  | 6.63378  | -1.95103 |
| C | -6.01234 | 2.92575  | -0.26384 | H | -0.84223  | 4.35574  | -1.14467 |
| C | -5.06489 | 3.84827  | 0.07171  | H | -1.33976  | 9.74934  | -0.30382 |
| C | 3.23946  | 3.46215  | 2.10427  | H | -0.37041  | 9.04982  | -1.61845 |
| C | 4.29840  | 3.52169  | 1.23564  | H | -2.10026  | 9.34341  | -1.84569 |
| C | 4.52420  | 2.16330  | 0.77547  | H | 3.83681   | -4.05935 | 5.08429  |
| N | 3.65459  | 1.30885  | 1.43083  | H | 2.27269   | -4.03825 | 5.90258  |
| C | 2.95573  | -0.14299 | 4.29151  | H | 2.39191   | -4.68484 | 4.25904  |
| C | 3.21695  | -1.41191 | 4.79913  | H | -7.87084  | -1.25992 | 0.40007  |
| C | 2.48594  | -2.52964 | 4.36565  | H | -10.18524 | -1.44484 | -0.45331 |
| C | 1.49229  | -2.33365 | 3.40119  | H | -9.33657  | 1.55580  | -3.40204 |
| C | 1.22273  | -1.06441 | 2.89245  | H | -7.02054  | 1.73828  | -2.54816 |
| C | -2.88300 | 6.15501  | 0.88485  | H | 7.13100   | 3.22541  | 0.87114  |
| C | -2.58067 | 7.43488  | 0.42293  | H | 8.73637   | 4.80243  | -0.16477 |
| C | -1.64854 | 7.63048  | -0.60589 | H | 7.10134   | 3.91796  | -4.03341 |
| C | -1.02566 | 6.50374  | -1.15548 | H | 5.49408   | 2.34989  | -2.99716 |
| C | -1.32966 | 5.21908  | -0.70230 | H | -11.73202 | -1.06915 | -2.41863 |
| C | -1.34416 | 9.01735  | -1.11899 | H | -12.02378 | 0.58948  | -1.88489 |
| C | 2.76329  | -3.90230 | 4.92906  | H | -11.43137 | 0.28990  | -3.52435 |
| C | -5.89955 | 0.37679  | -0.48175 | H | 9.90767   | 5.55402  | -2.21423 |
| C | 5.24569  | 1.74292  | -0.34735 | H | 9.25938   | 5.15583  | -3.82140 |
| C | 6.19954  | 2.67119  | -0.98740 | H | 8.53765   | 6.45880  | -2.86981 |

|   |          |          |          |   |          |          |          |
|---|----------|----------|----------|---|----------|----------|----------|
| C | -7.28254 | 0.26549  | -1.00141 | H | -1.89466 | -4.42701 | -1.29934 |
| C | -8.19285 | -0.64219 | -0.43178 | H | -1.54046 | -6.84443 | -0.92230 |
| C | -9.49533 | -0.74219 | -0.91399 | H | -1.08882 | -6.11623 | 3.28164  |
| C | -9.93469 | 0.05089  | -1.98360 | H | -1.44171 | -3.69935 | 2.90110  |
| C | -9.02297 | 0.94476  | -2.55945 | H | 5.20058  | -3.97726 | -1.15633 |
| C | -7.71922 | 1.05411  | -2.07867 | H | 5.57695  | -6.13845 | -2.28246 |
| C | 7.12018  | 3.38721  | -0.20166 | H | 1.48509  | -6.17457 | -3.57221 |
| C | 8.02285  | 4.27036  | -0.78872 | H | 1.09990  | -4.02328 | -2.42905 |
| C | 8.03383  | 4.47810  | -2.17472 | H | -0.31360 | -8.52702 | 0.75672  |
| C | 7.11343  | 3.76643  | -2.95705 | H | -0.75940 | -8.33681 | 2.46474  |
| C | 6.21193  | 2.87695  | -2.37854 | H | -1.99788 | -8.70939 | 1.25335  |
| C | -11.3550 | -0.04281 | -2.48413 | H | 4.46948  | -8.26929 | -3.16772 |
| C | 8.99025  | 5.46032  | -2.80451 | H | 2.86250  | -8.15260 | -3.91769 |
| C | -1.74522 | -4.80191 | -0.29140 | H | 4.27311  | -7.44419 | -4.71693 |
| C | -1.53773 | -6.16050 | -0.07708 | S | 0.05075  | 3.37975  | 1.66621  |
| C | -1.30462 | -6.66140 | 1.21375  |   |          |          |          |

**Table S7.** S<sub>0</sub> optimized geometry of the compound **4** at B3LYP/6-31G (d,p) level of theory and Empirical Dispersion GD2.

# Charge = 0

# Sum of imaginary frequencies = 0

# Total Energy (hartree) = -5624.917655

| Atom | X        | Y       | Z        | Atom | X        | Y        | Z        |
|------|----------|---------|----------|------|----------|----------|----------|
| C    | 1.11587  | 1.01574 | -1.41750 | C    | 1.36668  | 5.79528  | 2.34068  |
| C    | 0.87392  | 1.96474 | -0.41987 | C    | 1.56729  | 4.42850  | 2.11929  |
| C    | -0.42299 | 2.47353 | -0.26739 | C    | -4.21652 | 4.66833  | -1.75223 |
| C    | -1.46867 | 2.05580 | -1.09292 | C    | -4.37313 | 5.87583  | -2.42724 |
| C    | -1.21052 | 1.11494 | -2.09524 | C    | -3.31167 | 6.43826  | -3.15101 |
| C    | 0.07418  | 0.59557 | -2.24868 | C    | -2.09314 | 5.75229  | -3.16731 |
| C    | 1.96816  | 2.44897 | 0.55354  | C    | -1.93211 | 4.54119  | -2.48998 |
| C    | -2.85380 | 2.69796 | -0.94257 | C    | 1.16758  | 8.18471  | 1.51869  |
| O    | -2.96911 | 3.02122 | 0.46012  | C    | -3.49171 | 7.73220  | -3.90699 |
| C    | -3.94352 | 1.69947 | -1.28324 | H    | 2.10762  | 0.60088  | -1.55336 |
| O    | 1.76314  | 1.66086 | 1.74288  | H    | -0.62662 | 3.21100  | 0.49692  |
| C    | 3.37824  | 2.17978 | 0.06788  | H    | -2.01521 | 0.79006  | -2.74767 |
| C    | 1.78672  | 3.94523 | 0.83027  | H    | 0.26977  | -0.14125 | -3.02195 |
| C    | -2.99267 | 3.98040 | -1.77300 | H    | -3.81226 | 3.47846  | 0.58288  |

|   |          |          |          |   |           |          |          |
|---|----------|----------|----------|---|-----------|----------|----------|
| C | 4.36986  | 3.01068  | -0.46075 | H | 2.49352   | 1.85401  | 2.34904  |
| C | 5.49005  | 2.20793  | -0.73362 | H | 4.27534   | 4.07470  | -0.61424 |
| C | 5.17627  | 0.88998  | -0.35472 | H | 6.42935   | 2.52327  | -1.16273 |
| N | 3.88610  | 0.92024  | 0.13623  | H | 3.41894   | 0.04786  | 0.40215  |
| N | -4.05184 | 0.58944  | -0.52529 | H | -3.54718  | 0.33523  | 0.33579  |
| C | -5.06876 | -0.22409 | -0.98011 | H | -6.46589  | 0.07302  | -2.67701 |
| C | -5.63247 | 0.43436  | -2.09322 | H | -5.07681  | 2.37118  | -3.05651 |
| C | -4.91892 | 1.63000  | -2.28723 | H | 2.83367   | -1.31812 | 2.25808  |
| C | 1.63866  | -2.92088 | 1.36942  | H | 0.79845   | -0.33826 | 3.41283  |
| C | 1.84083  | -1.73631 | 2.16380  | H | 7.05578   | -3.05249 | -0.62309 |
| C | 0.75019  | -1.21785 | 2.78449  | H | 5.16213   | -4.88113 | -0.05987 |
| C | -0.52005 | -1.83769 | 2.49827  | H | -2.93794  | -4.12608 | 2.58671  |
| C | -1.75838 | -1.30146 | 2.72282  | H | -5.02073  | -4.17070 | 0.86850  |
| C | 2.57876  | -3.62307 | 0.65607  | H | -3.54451  | -0.56262 | 4.60308  |
| C | 3.87366  | -3.05882 | 0.31867  | H | -3.91645  | 1.69258  | 5.55018  |
| C | 2.25337  | -4.97370 | 0.11073  | H | -0.84077  | 3.26339  | 2.99609  |
| C | -2.95419 | -1.90851 | 2.13137  | H | -0.46417  | 1.02387  | 2.06799  |
| C | -1.94167 | 0.05376  | 3.29959  | H | 3.61485   | -6.02966 | 1.40254  |
| N | 4.08226  | -1.74434 | 0.22065  | H | 3.06964   | -8.26417 | 0.48947  |
| C | 5.39297  | -1.57753 | -0.20258 | H | 0.24053   | -6.47740 | -2.19751 |
| C | 6.02790  | -2.87732 | -0.33914 | H | 0.79766   | -4.23769 | -1.29228 |
| C | 5.07054  | -3.80435 | -0.04699 | H | 1.34806   | -9.66806 | -0.72499 |
| C | -3.38420 | -3.29241 | 2.05965  | H | 0.31420   | -8.91281 | -1.95722 |
| C | -4.45160 | -3.31278 | 1.19867  | H | 2.03465   | -9.17294 | -2.27568 |
| C | -4.63067 | -1.94726 | 0.74044  | H | -3.67608  | 4.21686  | 5.09745  |
| N | -3.72456 | -1.12579 | 1.38939  | H | -2.11977  | 4.11516  | 5.92424  |
| C | -2.93646 | 0.27331  | 4.26927  | H | -2.20067  | 4.79248  | 4.29033  |
| C | -3.14658 | 1.54363  | 4.79647  | H | 7.89713   | 1.28449  | 0.45143  |
| C | -2.38731 | 2.64200  | 4.36182  | H | 10.22013  | 1.48440  | -0.37625 |
| C | -1.41811 | 2.42537  | 3.37730  | H | 9.39124   | -1.44034 | -3.40568 |
| C | -1.19891 | 1.15403  | 2.84984  | H | 7.06735   | -1.63873 | -2.57688 |
| C | 2.88622  | -6.12498 | 0.60292  | H | -7.27220  | -2.90732 | 0.85899  |
| C | 2.57471  | -7.38265 | 0.08902  | H | -8.94770  | -4.42018 | -0.16121 |
| C | 1.62225  | -7.53279 | -0.92873 | H | -7.31871  | -3.59690 | -4.04589 |
| C | 0.98668  | -6.38317 | -1.41243 | H | -5.64124  | -2.09341 | -3.02541 |
| C | 1.29976  | -5.12042 | -0.90770 | H | 11.79156  | 1.14756  | -2.31334 |
| C | 1.30885  | -8.89464 | -1.49986 | H | 12.06254  | -0.53787 | -1.85741 |
| C | -2.60925 | 4.01620  | 4.94575  | H | 11.48553  | -0.15442 | -3.48454 |
| C | 5.93077  | -0.32417 | -0.48792 | H | -10.16272 | -5.13417 | -2.19247 |
| C | -5.34345 | -1.49865 | -0.37705 | H | -9.53025  | -4.74347 | -3.80778 |
| C | -6.33858 | -2.38831 | -1.00874 | H | -8.83553  | -6.07811 | -2.88052 |
| C | 7.31900  | -0.20561 | -0.99145 | H | 1.92139   | 4.48498  | -1.24916 |
| C | 8.22581  | 0.68595  | -0.39176 | H | 1.58777   | 6.90234  | -0.85420 |

|   |          |          |          |    |          |          |          |
|---|----------|----------|----------|----|----------|----------|----------|
| C | 9.53286  | 0.79459  | -0.85968 | H  | 1.18774  | 6.15335  | 3.35141  |
| C | 9.97997  | 0.02707  | -1.94447 | H  | 1.51841  | 3.73675  | 2.95269  |
| C | 9.07151  | -0.85017 | -2.55058 | H  | -5.05865 | 4.24593  | -1.21031 |
| C | 7.76348  | -0.96851 | -2.08412 | H  | -5.33010 | 6.39086  | -2.39446 |
| C | -7.27830 | -3.06860 | -0.21391 | H  | -1.25432 | 6.17277  | -3.71654 |
| C | -8.22045 | -3.91565 | -0.79212 | H  | -0.97341 | 4.03636  | -2.51592 |
| C | -8.25350 | -4.12177 | -2.17795 | H  | 0.39643  | 8.58433  | 0.84964  |
| C | -7.31412 | -3.44579 | -2.96941 | H  | 0.86135  | 8.38071  | 2.55108  |
| C | -6.37294 | -2.59241 | -2.39979 | H  | 2.08781  | 8.75144  | 1.32702  |
| C | 11.40487 | 0.12953  | -2.43021 | H  | -4.11380 | 8.43681  | -3.34402 |
| C | -9.25339 | -5.06582 | -2.79847 | H  | -2.52754 | 8.20842  | -4.11235 |
| C | 1.78711  | 4.85502  | -0.23735 | H  | -3.98786 | 7.55838  | -4.87101 |
| C | 1.59172  | 6.21374  | -0.01282 | Se | -0.20351 | -3.44055 | 1.47733  |
| C | 1.37911  | 6.70885  | 1.28379  |    |          |          |          |

**Table S8.**  $S_0$  optimized geometry of the compound **4.2H<sup>+</sup>** at B3LYP/6-31G (d,p) level of theory and Empirical Dispersion GD2.

# Charge = 2

# Sum of imaginary frequencies = 1

# Total Energy (hartree) = -5625.785978

| Atom | X        | Y        | Z        | Atom | X        | Y        | Z        |
|------|----------|----------|----------|------|----------|----------|----------|
| C    | -0.79826 | -1.00648 | -1.15859 | C    | -1.22403 | -4.39471 | 2.43434  |
| C    | -0.54891 | -2.01215 | -0.21852 | C    | 4.35949  | -4.78258 | -1.42143 |
| C    | 0.75682  | -2.49309 | -0.07468 | C    | 4.61032  | -5.82032 | -2.31735 |
| C    | 1.80531  | -2.01383 | -0.86307 | C    | 3.93731  | -5.89419 | -3.54410 |
| C    | 1.53346  | -1.02009 | -1.81366 | C    | 2.99716  | -4.89809 | -3.83784 |
| C    | 0.23960  | -0.51250 | -1.94960 | C    | 2.73869  | -3.85772 | -2.94561 |
| C    | -1.66065 | -2.55384 | 0.70684  | C    | -0.54651 | -8.14463 | 2.12105  |
| C    | 3.19945  | -2.64925 | -0.71474 | C    | 4.23238  | -6.99908 | -4.52717 |
| O    | 3.37029  | -3.13314 | 0.63042  | H    | -1.80265 | -0.62252 | -1.29512 |
| C    | 4.31878  | -1.62754 | -0.85124 | H    | 0.95965  | -3.25347 | 0.66603  |
| O    | -1.65913 | -1.66830 | 1.84255  | H    | 2.32726  | -0.65250 | -2.45674 |
| C    | -3.03224 | -2.43734 | 0.05435  | H    | 0.03770  | 0.25791  | -2.68695 |

|   |          |          |          |   |          |          |          |
|---|----------|----------|----------|---|----------|----------|----------|
| C | -1.37992 | -4.00796 | 1.10188  | H | 3.03428  | -4.04093 | 0.65764  |
| C | 3.41827  | -3.78673 | -1.72433 | H | -2.24848 | -2.04200 | 2.51550  |
| C | -3.75626 | -3.27284 | -0.80047 | H | -3.43547 | -4.23799 | -1.15816 |
| C | -4.96146 | -2.62908 | -1.09325 | H | -5.74284 | -2.97729 | -1.75216 |
| C | -4.98074 | -1.38983 | -0.42053 | H | -3.50318 | -0.63606 | 0.96496  |
| N | -3.76455 | -1.30851 | 0.25719  | H | 3.25257  | 0.06389  | -0.27354 |
| N | 4.15687  | -0.34447 | -0.46029 | H | 7.35176  | -0.35788 | -1.20215 |
| C | 5.35494  | 0.36291  | -0.57734 | H | 6.09808  | -2.72833 | -1.55024 |
| C | 6.30484  | -0.57332 | -1.04798 | H | -3.13688 | 1.42458  | 2.21152  |
| C | 5.66296  | -1.79939 | -1.21563 | H | -0.94016 | 0.75199  | 3.26530  |
| C | -2.16665 | 3.01943  | 1.04858  | H | -7.66108 | 1.98409  | 0.03764  |
| C | -2.19577 | 1.89440  | 1.95129  | H | -6.20658 | 4.20425  | 0.47353  |
| C | -1.02061 | 1.54830  | 2.53738  | H | 2.24619  | 4.67607  | 1.36365  |
| C | 0.15152  | 2.27023  | 2.11239  | H | 4.51766  | 4.51515  | -0.07002 |
| C | 1.44429  | 1.88386  | 2.37262  | H | 3.15596  | 1.50746  | 4.45590  |
| C | -3.24643 | 3.59746  | 0.41754  | H | 3.77388  | -0.63468 | 5.52658  |
| C | -4.47107 | 2.84017  | 0.27328  | H | 1.07048  | -2.72162 | 2.92181  |
| C | -3.18611 | 4.95357  | -0.18901 | H | 0.45877  | -0.59424 | 1.85186  |
| C | 2.58222  | 2.50747  | 1.72828  | H | -4.71707 | 5.78872  | 1.08368  |
| C | 1.74476  | 0.61239  | 3.08630  | H | -4.61831 | 8.03393  | 0.06610  |
| N | -4.41907 | 1.49518  | 0.02774  | H | -1.51713 | 6.70970  | -2.58745 |
| C | -5.69659 | 0.97786  | -0.16091 | H | -1.63268 | 4.44590  | -1.59907 |
| C | -6.58452 | 2.06806  | 0.03660  | H | -3.26864 | 9.68271  | -1.24249 |
| C | -5.83430 | 3.21113  | 0.27535  | H | -2.03211 | 9.11652  | -2.38814 |
| C | 2.85372  | 3.79568  | 1.21100  | H | -3.74854 | 8.97745  | -2.78966 |
| C | 4.04601  | 3.72439  | 0.49460  | H | 3.74516  | -3.57081 | 4.35665  |
| C | 4.50816  | 2.38704  | 0.54068  | H | 3.20786  | -3.02408 | 5.95000  |
| N | 3.60940  | 1.69950  | 1.33375  | H | 2.08298  | -3.88287 | 4.87172  |
| C | 2.69818  | 0.58130  | 4.12037  | H | -7.39431 | -2.56315 | 0.19028  |
| C | 3.04593  | -0.62682 | 4.72014  | H | -9.66051 | -3.17433 | -0.57671 |
| C | 2.47269  | -1.83723 | 4.29904  | H | -9.81653 | 0.38288  | -2.97781 |

|   |          |          |          |    |          |          |          |
|---|----------|----------|----------|----|----------|----------|----------|
| C | 1.52737  | -1.79906 | 3.26695  | H  | -7.54886 | 0.99873  | -2.22360 |
| C | 1.17387  | -0.59636 | 2.66202  | H  | 6.78039  | 3.74563  | 1.00439  |
| C | -4.03261 | 5.97768  | 0.26278  | H  | 8.67144  | 5.08110  | 0.14591  |
| C | -3.96727 | 7.24748  | -0.30543 | H  | 8.64034  | 2.80025  | -3.49453 |
| C | -3.06517 | 7.53455  | -1.34051 | H  | 6.72979  | 1.48054  | -2.66000 |
| C | -2.22224 | 6.50868  | -1.78557 | H  | -11.4240 | -2.87909 | -2.33814 |
| C | -2.28159 | 5.23296  | -1.22518 | H  | -12.0364 | -1.43376 | -1.52764 |
| C | -3.02126 | 8.90380  | -1.97070 | H  | -11.5464 | -1.33901 | -3.22438 |
| C | 2.89493  | -3.14930 | 4.90887  | H  | 10.55331 | 5.24972  | -1.45754 |
| C | -5.96638 | -0.36606 | -0.48396 | H  | 10.54743 | 4.29591  | -2.96213 |
| C | 5.49351  | 1.73595  | -0.24808 | H  | 9.53634  | 5.73858  | -2.81806 |
| C | 6.61594  | 2.51070  | -0.76188 | H  | -1.26889 | -4.68680 | -0.94314 |
| C | -7.30990 | -0.72808 | -0.94691 | H  | -0.82148 | -7.03540 | -0.36133 |
| C | -7.92030 | -1.92304 | -0.50927 | H  | -0.83132 | -6.00649 | 3.80347  |
| C | -9.19794 | -2.25978 | -0.93619 | H  | -1.28067 | -3.66631 | 3.23627  |
| C | -9.90839 | -1.43298 | -1.82183 | H  | 4.89521  | -4.74137 | -0.47860 |
| C | -9.29302 | -0.25388 | -2.27091 | H  | 5.33789  | -6.58545 | -2.06055 |
| C | -8.02077 | 0.10113  | -1.83975 | H  | 2.45394  | -4.94114 | -4.77802 |
| C | 7.17124  | 3.55546  | 0.01081  | H  | 1.99699  | -3.11098 | -3.20400 |
| C | 8.24089  | 4.29739  | -0.47023 | H  | 0.19786  | -8.58325 | 1.44779  |
| C | 8.78949  | 4.03964  | -1.73770 | H  | -0.18647 | -8.24064 | 3.14965  |
| C | 8.23415  | 3.00396  | -2.50809 | H  | -1.46082 | -8.74436 | 2.02907  |
| C | 7.16897  | 2.25028  | -2.03562 | H  | 4.55843  | -7.90952 | -4.01469 |
| C | -11.3022 | -1.79421 | -2.26009 | H  | 3.35316  | -7.23505 | -5.13500 |
| C | 9.92540  | 4.87058  | -2.26936 | H  | 5.03626  | -6.70205 | -5.21321 |
| C | -1.21839 | -4.97823 | 0.10088  | Se | -0.38738 | 3.69814  | 0.94824  |
| C | -0.94725 | -6.30190 | 0.43031  | H  | 3.73597  | 0.76023  | 1.68685  |
| C | -0.81732 | -6.70356 | 1.769625 | H  | -3.57296 | 1.052712 | -0.29912 |
| C | -0.95004 | -5.72690 | 2.760412 |    |          |          |          |

---

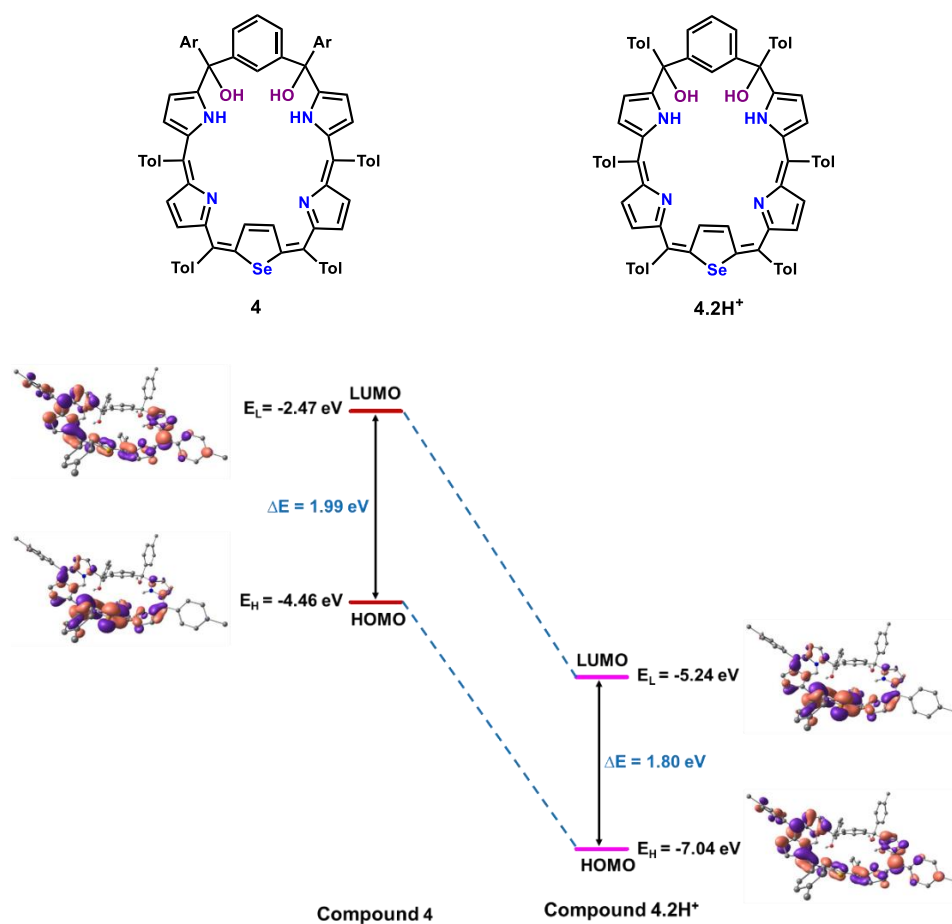

**Figure S48.** Energy-level diagram (selected FMOs) of compound **4** and its protonated derivative **4.2H<sup>+</sup>**.

**Table S9.**  $S_0$  optimized geometry of the compound **5** at B3LYP/6-31G (d,p) + LANL2DZ level of theory and Empirical Dispersion GD2.

# Charge = 0

# Sum of imaginary frequencies= 0

# Total Energy (hartree) = -3233.447628

| Atom | X        | Y        | Z        | Atom | X        | Y        | Z        |
|------|----------|----------|----------|------|----------|----------|----------|
| C    | 1.036886 | 1.773424 | -2.08677 | C    | 1.61407  | 5.929444 | 2.301107 |
| C    | 0.744744 | 2.374165 | -0.86198 | C    | 1.68705  | 4.581407 | 1.941639 |
| C    | -0.58983 | 2.67374  | -0.54856 | C    | -4.81788 | 4.560779 | -1.54445 |
| C    | -1.62827 | 2.376223 | -1.43283 | C    | -5.22733 | 5.79308  | -2.04686 |



|   |          |          |          |   |          |          |          |
|---|----------|----------|----------|---|----------|----------|----------|
| C | -1.32129 | 1.766005 | -2.65705 | C | -4.34468 | 6.610424 | -2.76684 |
| C | 0.001665 | 1.471207 | -2.97806 | C | -3.0384  | 6.147255 | -2.95322 |
| C | 1.819569 | 2.716299 | 0.187757 | C | -2.62296 | 4.914181 | -2.44643 |
| C | -3.07376 | 2.770383 | -1.07669 | C | 1.445591 | 8.393239 | 1.720062 |
| O | -3.07253 | 2.935608 | 0.354705 | C | -4.79971 | 7.931513 | -3.34037 |
| C | -4.0456  | 1.64779  | -1.41366 | H | 2.06251  | 1.537187 | -2.35038 |
| O | 1.527676 | 1.843118 | 1.296157 | H | -0.8267  | 3.146743 | 0.395147 |
| C | 3.248262 | 2.435704 | -0.25182 | H | -2.11761 | 1.521222 | -3.35397 |
| C | 1.701016 | 4.198267 | 0.598877 | H | 0.232542 | 0.997438 | -3.92786 |
| C | -3.5059  | 4.09568  | -1.73558 | H | -3.93958 | 3.275282 | 0.612268 |
| C | 4.245008 | 3.285758 | -0.74041 | H | 2.273271 | 1.887338 | 1.911638 |
| C | 5.405922 | 2.519511 | -0.92032 | H | 4.133545 | 4.343901 | -0.91994 |
| C | 5.118095 | 1.201484 | -0.52315 | H | 6.359072 | 2.866256 | -1.29011 |
| N | 3.791027 | 1.188985 | -0.13059 | H | 3.340793 | 0.30967  | 0.137787 |
| N | -4.07022 | 0.53929  | -0.63868 | H | -3.53764 | 0.328564 | 0.216091 |
| C | -5.02922 | -0.35069 | -1.08185 | H | -6.44081 | -0.17755 | -2.78648 |
| C | -5.63281 | 0.245626 | -2.20853 | H | -5.2348  | 2.202485 | -3.19601 |
| C | -5.01054 | 1.486472 | -2.41931 | H | 2.921591 | -1.45072 | 2.398668 |
| C | 1.83036  | -2.98626 | 1.301131 | H | 0.889223 | -0.53842 | 3.50571  |
| C | 1.938189 | -1.86568 | 2.204237 | H | 7.337286 | -2.55876 | -0.35519 |
| C | 0.825017 | -1.36537 | 2.806015 | H | 5.582098 | -4.52718 | 0.174838 |
| C | -0.47668 | -1.89796 | 2.469904 | H | -3.0374  | -4.09004 | 2.795133 |
| C | -1.69527 | -1.34941 | 2.750686 | H | -5.05053 | -4.1949  | 1.013783 |
| C | 2.839655 | -3.53405 | 0.547968 | H | -3.44834 | -0.8906  | 4.736072 |
| C | 4.09346  | -2.82553 | 0.29167  | H | -3.82202 | 1.186477 | 6.007336 |
| C | 2.681861 | -4.84983 | -0.13097 | H | -0.81754 | 3.157902 | 3.655009 |
| C | -2.90683 | -1.92571 | 2.130497 | H | -0.43847 | 1.093575 | 2.389329 |
| C | -1.8821  | -0.07582 | 3.496252 | H | 2.006971 | -5.903   | 1.625171 |
| N | 4.179434 | -1.50361 | 0.13714  | H | 1.729931 | -8.071   | 0.487967 |
| C | 5.507844 | -1.2341  | -0.1858  | H | 3.082067 | -6.3152  | -3.18953 |
| C | 6.274667 | -2.46971 | -0.18015 | H | 3.346832 | -4.14291 | -2.05581 |
| C | 5.387016 | -3.46682 | 0.090458 | H | 1.474344 | -9.31082 | -1.66366 |
| C | -3.40491 | -3.29065 | 2.165086 | H | 2.010543 | -8.58119 | -3.18598 |
| C | -4.44527 | -3.33772 | 1.27332  | H | 3.191057 | -9.26674 | -2.06862 |
| C | -4.54858 | -2.01043 | 0.696478 | H | -3.60224 | 3.729824 | 5.997106 |
| N | -3.60759 | -1.17705 | 1.294221 | H | -1.98483 | 3.576809 | 6.681188 |
| C | -2.85622 | -0.00836 | 4.509276 | H | -2.21899 | 4.475593 | 5.179793 |
| C | -3.0677  | 1.166273 | 5.223767 | H | 7.814286 | 1.663281 | 0.639661 |
| C | -2.32924 | 2.326337 | 4.946088 | H | 10.17275 | 1.976036 | -0.00743 |
| C | -1.38039 | 2.265318 | 3.918953 | H | 9.65873  | -0.81103 | -3.23239 |
| C | -1.15522 | 1.089139 | 3.203002 | H | 7.299539 | -1.12774 | -2.58128 |

|   |          |          |          |    |          |          |          |
|---|----------|----------|----------|----|----------|----------|----------|
| C | 2.227455 | -5.98375 | 0.565215 | H  | -7.36062 | -2.78738 | 0.811976 |
| C | 2.079645 | -7.21118 | -0.07874 | H  | -9.03744 | -4.32258 | -0.15027 |
| C | 2.384889 | -7.35941 | -1.43789 | H  | -7.10868 | -4.0282  | -3.97489 |
| C | 2.845081 | -6.23138 | -2.13138 | H  | -5.43171 | -2.49935 | -3.01323 |
| C | 2.997347 | -5.0031  | -1.49311 | H  | 11.9054  | 1.782433 | -1.82104 |
| C | 2.254185 | -8.69775 | -2.12547 | H  | 12.18902 | 0.074396 | -1.4839  |
| C | -2.54698 | 3.593814 | 5.738387 | H  | 11.71317 | 0.578664 | -3.10643 |
| C | 5.960445 | 0.038965 | -0.51699 | H  | -10.1076 | -5.31658 | -2.1031  |
| C | -5.26586 | -1.61037 | -0.43313 | H  | -9.50899 | -4.9508  | -3.72953 |
| C | -6.27062 | -2.52867 | -1.02709 | H  | -8.79181 | -6.26588 | -2.79971 |
| C | 7.38279  | 0.234229 | -0.91559 | H  | 1.614525 | 4.931381 | -1.42669 |
| C | 8.215312 | 1.119156 | -0.20984 | H  | 1.507783 | 7.306437 | -0.79047 |
| C | 9.547904 | 1.292124 | -0.57694 | H  | 1.60258  | 6.198591 | 3.354664 |
| C | 10.09818 | 0.599861 | -1.66452 | H  | 1.715386 | 3.827609 | 2.721354 |
| C | 9.263253 | -0.27193 | -2.37486 | H  | -5.53738 | 3.947131 | -1.0081  |
| C | 7.93113  | -0.45661 | -2.00796 | H  | -6.24965 | 6.124317 | -1.87976 |
| C | -7.29752 | -3.06758 | -0.23477 | H  | -2.32783 | 6.76119  | -3.50165 |
| C | -8.24514 | -3.9303  | -0.7831  | H  | -1.59981 | 4.593512 | -2.60386 |
| C | -8.19952 | -4.29475 | -2.13439 | H  | 0.419591 | 8.762228 | 1.598451 |
| C | -7.17198 | -3.75782 | -2.92348 | H  | 1.729429 | 8.551708 | 2.764409 |
| C | -6.22652 | -2.88905 | -2.38553 | H  | 2.089517 | 9.021699 | 1.095856 |
| C | 11.55047 | 0.771053 | -2.04179 | H  | -5.50102 | 8.438978 | -2.67035 |
| C | -9.2077  | -5.25351 | -2.72149 | H  | -3.95452 | 8.602919 | -3.51786 |
| C | 1.6284   | 5.204281 | -0.37553 | H  | -5.31343 | 7.791906 | -4.29992 |
| C | 1.562024 | 6.547199 | -0.01356 | Te | -0.20568 | -3.61846 | 1.224247 |
| C | 1.551993 | 6.936879 | 1.333763 |    |          |          |          |

**Table S10.** Comparison of the relative energies of *m*-benzicalixhexaphyrin(1.1.1.1.1.1)s **2-5** and *m*-benziheterohexaphyrin(1.1.1.1.1.1)s **6a-6d**.

| Compound | Relative Energy<br>(hartree) | Compound | Relative Energy<br>(hartree) |
|----------|------------------------------|----------|------------------------------|
| 2        | -3300.8                      | 6a       | -3147.8                      |
| 3b       | -3623.7                      | 6b       | -3470.8                      |
| 4        | -5624.9                      | 6c       | -5472.0                      |
| 5        | -3233.4                      | 6d       | -3080.5                      |

**References:**

1. S. Kumar, K. G. Thorat, W.-Z. Lee, M. Ravikanth, *Inorg. Chem.* **2018**, *57*, 8956–8963.
2. (a) A. Ulman, J. Manassen, *J. Am. Chem. Soc.* **1975**, *97*, 6540–6544; (b) P-Y. Heo, K. Shin, C-H. Lee, *Bull. Korean Chem. Soc.* **1996**, *17*, 515–520; (c) S. J. Narayanan, B. Sridevi, T. K. Chandrashekar, A. Vij, R. Roy, *J. Am. Chem. Soc.* **1999**, *121*, 9053–9068; (d) H. A. Stansbury, W. R. Proops, *J. Org. Chem.* **1962**, *27*, 320; (e) A. Ulman, J. Manassen, F. Frolow, D. Rabinovich, *Tetrahedron Lett.* **1978**, *19*, 1885–1886.
3. M. J. Frisch, G. W. Trucks, H. B. Schlegel, G. E. Scuseria, M. A. Robb, J. R. Cheeseman, G. Scalmani, V. Barone, B. Mennucci, G. A. Petersson et al. Gaussian 09, Revision C.01. Gaussian 09, Revision B.01; Gaussian, Inc.: Wallingford, CT, 2009.
4. A. D. Becke, *J. Chem. Phys.* **1993**, *98*, 1372–1377.
5. (a) S. Grimme, *J. Comput. Chem.* **2006**, *27*, 1787–1799; (b) A. Austin, G. A. Petersson, M. J. Frisch, F. J. Dobek, G. Scalmani, K. Throssell, *J. Chem. Theory Comput.* **2012**, *8*, 4989–5007.
6. W. J. Hehre, *Acc. Chem. Res.* **1976**, *9*, 399–406.
7. J. Tomasi, B. Mennucci, R. Cammi, *Chem. Rev.* **2005**, *105*, 2999–3093.
